# Supplementary material for: Mesenchymal state of intimal cells may explain higher propensity to ascending aortic aneurysm in bicuspid aortic valves
Source: PubMed Central journal article supplement (PMC5078843; doi:10.1038/srep35712), 2016-10-25
Supplement: srep35712-s1.pdf [file srep35712-s1.pdf]

## Supplementary materials

### Mesenchymal state of intimal cells may explain higher propensity to ascending aortic aneurysm in bicuspid aortic valves

Shohreh Maleki, Sanela Kjellqvist, Valentina Paloschi, Joelle Magné, Rui Branca, Lei Du, Kjell Hultenby, Johan Petrini, Jonas Fuxe, MIBAVA Leducq Consortium, Janne Lehtiö, Anders Franco-Cereceda, Per Eriksson, Hanna M. Björck.

| Page | Content                                                                                                                               |
|------|---------------------------------------------------------------------------------------------------------------------------------------|
| 2    | Detailed Material and Methods                                                                                                         |
| 6    | Supplementary Table 1A-C, Descriptive patient characteristics                                                                         |
| 8    | Supplementary Table 2, Antibodies                                                                                                     |
| 9    | Supplementary Table 3, Model parameter values                                                                                         |
| 10   | Supplementary Table 4, Significantly up and downregulated proteins, non-dilated and dilated aorta                                     |
| 46   | Supplementary Table 5, KEGG and Hallmark analysis, non-dilated and dilated aorta                                                      |
| 48   | Supplementary Table 6, Ingenuity pathway analysis, non-dilated and dilated aorta                                                      |
| 49   | Supplementary Table 7, PubMed search for 30 top upregulated proteins in BAV-ND                                                        |
| 51   | Supplementary Table 8, PubMed search for 30 top downregulated proteins in BAV-ND                                                      |
| 53   | Supplementary Table 9, mRNA expression, non-dilated and dilated aorta                                                                 |
| 54   | Figure S1, PCA and OPLS-DA of proteomic data                                                                                          |
| 55   | Figure S2, Protein–protein interactions (PPIs) network of proteins involved in enriched hallmark gene sets shown in Table S5b and S5d |
| 56   | Figure S3, Higher magnification of major pathways selected from Fig 1 and Fig S2                                                      |
| 60   | Figure S4, EM view of EC junctions in dilated BAV and TAV aorta                                                                       |
| 61   | Figure S5, Staining of neovascularization areas as internal control                                                                   |
| 62   | Figure S6, Relative distribution of PTPRB and CDH5-Y658                                                                               |
| 63   | Figure S7, cell proliferation in relation to cell junction                                                                            |
| 64   | Figure S8, Western blot analysis of MFNG and MYLK expression in BAV and TAV non-dilated aorta                                         |
| 65   | Figure S9, Internal thoracic arteries                                                                                                 |
| 66   | Figure S10, Internal thoracic arteries                                                                                                |
| 67   | Figure S11, Internal thoracic arteries                                                                                                |
| 68   | Figure S12, Internal thoracic arteries                                                                                                |
| 69   | References                                                                                                                            |

## Detailed Material and Methods

### *Clinical samples*

Ascending aorta and internal thoracic artery biopsies were obtained from the Advanced Study of Aortic Pathology (ASAP) biobank. A detailed description of the study population can be found elsewhere.<sup>1</sup> In brief, patients undergoing elective open-heart surgery for aortic valve and/or ascending aortic disease at the Karolinska University Hospital, Stockholm, Sweden were included. Patients were classified according to aortic valve cuspidity and dilatation based on visual inspection and transesophageal diameter measurements of the ascending aorta during surgery, respectively. An ascending aortic diameter of >45 mm was considered dilated, ascending aortas with a diameter <40 mm were classified as non-dilated. Non-dilated patients were operated due to dysfunctional valves. Patients with syndromic aortic pathologies, dissection and/or significant coronary artery disease (according to angiography measurements) were excluded from the study. The study was approved by the Human Research Ethics Committee at Karolinska Institutet (application number 2006/784-31/1) and methods were carried out in accordance with the relevant guidelines. Written informed consent was obtained from all patients according to the declaration of Helsinki.

Aortic biopsies were taken from the anterior part of the ascending aorta, a few cm above the aortic valve, and from the proximal portion of the internal thoracic artery. Internal thoracic arteries were used as controls for exposure to flow disturbances caused by the BAV, as well as for possible genetic alteration that could be traced in vessels other than the aorta. The intima-media of the aortic wall was separated from the adventitia. Tissue biopsies for histological studies were incubated in 4% Zn-formaldehyde for 24 hours and stored in ethanol until paraffin embedding. Tissue biopsies for protein expression were snap frozen on dry ice at the site of surgery and stored at -80°C pending protein extraction. Due to the small size of surgically removed non-dilated aorta, non-overlapping and randomly selected specimens were used for proteomic, RNA analysis, immunohistochemistry, immunofluorescence, electron microscopy and western blot from BAV=62 and TAV=54. Proteomic on dilated aorta was done on N=6 BAV and N=5 TAV. Characteristics of patients included in proteomic, RNA analysis and immunohistochemistry/fluorescence are shown in Supplementary Table 1a-c.

### *HiRIEF and LC-MS/MS of protein samples*

Total protein was extracted from the intima-media of 21 patients (5 BAV-ND, 5 TAV-ND, 6 BAV-D and 5 TAV-D), as previously described.<sup>2</sup> The intima-media were dissolved in a cell lysis buffer (2D protein extraction buffer V from GE Healthcare containing 30 mM Tris buffer pH 8.0) including protease inhibitor cocktail (Complete Mini Roche EDTA free). Tissue samples were mechanically homogenized using a TissueLyzer system (Qiagen), according to manufacturer's instructions. Samples were subsequently sonicated in a water bath sonicator at 4°C (30 seconds at high intensity followed by 30 seconds resting for 8 minutes) and pelleted at 12000g for 10 min at 4°C. Protein content was measured by Bradford protein assay (BioRad). Samples were aliquoted and stored at -80°C.

We used a liquid chromatography–mass spectrometry (LC-MS/MS)-based method with high-resolution isoelectric focusing (HiRIEF)<sup>3</sup> and pre-fractionation at the peptide level, at two different pH ranges, 3.7–4.9 and 4.00–4.25. For each LC-MS run of a HiRIEF fraction, the auto sampler (Ultimate 3000 RSLC system, Thermo Scientific Dionex) dispensed 15µl of mobile phase A (97% water, 3% acetonitrile, 0.1% formic acid) into the corresponding well of the microtiter plate (96 well V-bottom, polystyrene, Corning), mixed by aspirating/dispensing 10µl ten times, and finally injected 7µl into a C18 guard desalting column (Acclaim pepmap 100, 75µm x 2cm, nanoViper, Thermo). After 5min of flow at 5µl/min with the loading pump, the 10-port valve switched to analysis mode in which the NC pump provided a flow of 250nL/min through the guard column. The curved gradient (curve 6 in the Chromeleon software) then proceeded from 3% mobile phase B (95% acetonitrile, 5% water, 0.1% formic acid) to 45%B in 45min followed by wash at 99%B and re-equilibration. Total LC-MS run time was 69 min. We used a nano EASY-Spray column (pepmap RSLC, C18, 2µm bead size, 100Å, 75µm internal diameter, 50cm long, Thermo) on the nano electrospray ionization (NSI) EASY-Spray source

(Thermo) at 60°C. Online LC-MS was performed using a hybrid Q-Exactive mass spectrometer (Thermo Scientific). FTMS master scans with 70,000 resolution (and mass range 300-1700 m/z) were followed by data-dependent MS/MS (17,500 resolution) on the top 5 ions using higher energy collision dissociation (HCD) at 30% normalized collision energy. Precursors were isolated with a 2m/z window. Automatic gain control (AGC) targets were 1e6 for MS1 and 1e5 for MS2. Maximum injection times were 100ms for MS1 and 500ms for MS2. Dynamic exclusion was used with 60s duration. Precursors with unassigned charge state or charge state 1 were excluded. An underfill ratio of 1% was used.

All MS/MS spectra were searched by Sequest and processed with Percolator under the software platform Proteome Discoverer 1.4 against the human subset of Swissprot, including canonical and isoform entries, version 2015-12 (42080 sequences, from uniprot.org). Precursor mass tolerance of 10 ppm and product mass tolerance of 0.02 Da were used. The enzyme used was trypsin and up to one missed cleavage was considered. Oxidation of methionine was used as variable modification. Carbamidomethylation of cysteine, and iTRAQ8plex on peptide N-terminus and on lysine were used as fixed modifications. A cut off of 1% FDR at peptide level was used. One peptide per protein was considered sufficient for protein identification. Quantification was done using Isobaric tags for relative and absolute quantitation (iTRAQ, ABSciex). iTRAQ reporter ion quantitation and ratio calculations were done by the "Reporter ions Quantifier" module of Proteome Discoverer. The 21 samples used for proteomics were arranged in three iTRAQ8plex sets, each set containing 7 samples and one internal standard (prepared by pooling the peptides of all 21 samples), which was used as denominator in all ratio calculations. The quantitative value of each protein for each patient was calculated as the median of the PSM (peptide spectrum matches) ratios assigned to that particular protein. The obtained ratios were further normalized by median-centering of each sample. The mass spectrometry proteomics data have been deposited to the ProteomeXchange Consortium via the PRIDE partner repository with the dataset identifier PXD003702 and can be accessed at <https://www.ebi.ac.uk/pride/archive/login>. (**Username:** [reviewer95031@ebi.ac.uk](mailto:reviewer95031@ebi.ac.uk)  
**Password:** EhAG6nMr)

### ***Immunohistochemistry (IHC)***

Localization and protein expression levels were tested by immunostaining using deparaffinized tissue sections treated with or without DIVA solution (Biocare Medical), as described previously.<sup>4</sup> Following antigen retrieval, sections were washed and quenched for endogenous peroxidase activity with 3% hydrogen peroxide for 5 minutes. Nonspecific binding sites were blocked with 20% normal goat or horse serum for 30 minutes and then incubated overnight at 4°C with primary antibody (Supplementary Table 2). After washing, sections were incubated with biotinylated anti-rabbit or anti-goat IgG (Vector Laboratories) for 1 hour. Sections were then incubated with Avidin-biotin peroxidase complex (Vectastain ABC kit, Vector Laboratories) for 30 min in room temperature, followed by visualization by 3,3'-diaminobenzidine tetrahydrochloride (Dako). All sections were counterstained with Mayer's hematoxylin (Histolab Products). Quantification of percent area positive staining was performed using Image-Pro® Premier version 9.1 Software (Media Cybernetics®, Silver Spring, MD). The expression of each protein was studied in 6-10 patients from each group (BAV-ND and TAV-ND) in both aortas and internal thoracic arteries (unless otherwise stated).

### ***Western Blot analysis***

The expression level of Manic Fringe (MNFG) and MYLK (myosin light chain kinase) were analyzed by Western Blot. Protein lysates were prepared by tissue homogenization in RIPA buffer (Thermo Fisher Scientific) as described in the proteomic method section for non-dilated aorta of BAV and TAV patients. Twenty microgram of protein was re-suspended in Laemmli Sample Buffer (BioRad) containing 0.2M DTT and subjected to SDS-PAGE using 4-15% Bis-Tris Protein Gels (Invitrogen NuPAGE), or 4-20% Mini-PROTEAN TGX gels (BioRad) for 60 min at 120V. Proteins transfer was performed with Tran-Blot turbo system (Bio Rad) to nitrocellulose membranes (Bio Rad) according to standard protocols, followed by blocking in 5% dry-milk in TTBS. The blots were incubated with

monoclonal primary anti-MNFG or anti-MYLK antibodies overnight, followed by 30 minutes incubation with horseradish peroxidase–labeled secondary antibody. Enhanced chemiluminescence Western blot detection reagent (Amersham, GE Healthcare) was used for detection. Monoclonal anti-beta-actin antibody was used as loading control (Sigma).

### ***Immunofluorescence***

Acetone-fixed cryosections of four BAV and TAV non-dilated aorta were first incubated with rabbit anti-VE-Cadherin antibody or rabbit anti-Von Willebrand Factor antibody (Supplementary Table 2) at 4°C overnight, followed by AlexaFluor 594 labeled goat anti-rabbit IgG (Life technologies, Stockholm, Sweden) for 1h. Sections were then incubated overnight with mouse anti-clathrin antibody (Ab2731, Abcam, Stockholm, Sweden), followed by AlexaFluor 488 labeled goat anti-mouse IgG (Life technologies, Stockholm, Sweden), with subsequent staining of the nuclei using DAPI. Antibody specificity was confirmed by incubation with isotype-matched control IgG. Images were obtained using a Zeiss LSM700 confocal laser microscope using x40 water, 1.2 of numerical aperture (NA) objective lens. Each image consisted of a Z-stack of 15 to 20 optical slices taken at 0.3µm intervals.

### ***Transmission electron microscopy (TEM)***

TEM was done as described previously.<sup>5</sup> Briefly, samples of ascending aortas from three BAV and TAV non-dilated individuals were dissected and small pieces were fixed in 2% glutaraldehyde +1% paraformaldehyde in 0.1M phosphate buffer, pH 7.4 at room temperature and stored at 4°C. Specimens were rinsed in 0.1 M phosphate buffer, pH 7.4 and post-fixed in 2% osmium tetroxide 0.1 M phosphate buffer, pH 7.4 at 40°C for 2 hours, dehydrated in ethanol followed by acetone and embedded in LX-112 (Ladd, Burlington, Vermont, USA). Semi-thin sections were cut and stained with toluidine blue O and used for light microscopic analysis. Ultrathin sections (approximately 50-60 nm) were cut by a Leica EM UC 6 (Leica, Wien, Austria) and contrasted with uranyl acetate followed by lead citrate and examined in a Tecnai 12 Spirit Bio TWIN transmission electron microscope (FEI company, Eindhoven, The Netherlands) at 100 kV. Digital images were taken by using a Veleta camera (Olympus Soft Imaging Solutions, GmbH, Münster, Germany).<sup>6</sup>

### ***Statistical analysis***

Principal component analysis (PCA)<sup>7</sup>, and orthogonal projections to latent structures discriminant analysis (OPLS-DA) were used to analyze proteomics data. OPLS-DA is a supervised multivariate analysis method where the systematic variation in X matrix is divided into two parts, one that is linearly related to Y (and therefore predictive) and one that is unrelated (orthogonal) to Y<sup>8,9</sup>. Two new units from two types of analyses (PCA and OPLS-DA), scores and loadings can be obtained. The scores give information about the new observations projected onto a lower dimensional plane that summarizes the behavior of the original ones. The loadings reveal how the PC model plane is inserted into the variable space and thereby can be used to interpret the meaning of the scores. Quality parameters for all multivariate analysis models performed are shown in Supplementary Table 3. The protein expressions were subjected to UV scaling and mean centering prior to multivariate data analysis. The PCA and OPLS-DA analyses were performed using Simca P+13.0.2x64 (Umetrics) software. The multivariate models were mean centered and unit variance scaled and model complexity was estimated according to 7-fold cross-validation<sup>10</sup> in Simca P+14x64 (Umetrics) software, unless otherwise stated.

PCA analysis was carried out using color coding of TAV and BAV samples. The significance of differentially expressed proteins was analyzed by means of loadings in OPLS-DA model (with BAV samples as a Y vector), including jack-knife confidence levels derived from cross-validation of the loadings.<sup>9,10</sup> Significance was calculated as absolute values of loadings – absolute values of jack-knife confidence intervals; if positive indicates significant protein. Differential gene expression has been previously published by us<sup>11</sup> and here we present the age adjusted data. Briefly, RNA was extracted from intima-media biopsies of both non-dilated and dilated aorta and analyzed by Affymetrix GeneChip Human Exon 1.0 ST arrays, using Student's T-test assuming unequal variance (R 2.13.0).

The array data was validated by qRT-PCR for 11 genes.<sup>11</sup> Differences in protein expression assessed by IHC and WB were analyzed by student's t-test (GraphPad Prism 5, La Jolla, CA). Data are expressed as mean and percent area positive staining  $\pm$  SD for gene and protein expression, respectively. A P-value of  $P < 0.05$  was considered statistically significant. Ingenuity pathway analysis was performed on significant proteins from the OPLS-DA model. Canonical pathways are shown. KEGG pathway and Hallmark analysis within Gene Set Enrichment Analysis and the Molecular Signatures Database resource v 5.0 was used to investigate gene/protein sets.<sup>12</sup> Differentially expressed proteins were selected either in non-dilated or dilated samples and were mapped to protein-protein interaction database (Human Protein Reference Database).<sup>13</sup> The retrieved interactions are shown in Fig 1, and Figs S2 and S3.

**Supplementary Table 1a-c. Descriptive patient characteristics**

| Parameter <sup>1</sup>                   | BAV Non-dilated | TAV Non-dilated | P-value | BAV Dilated | TAV Dilated   | P-value |
|------------------------------------------|-----------------|-----------------|---------|-------------|---------------|---------|
| <b>N</b>                                 | 5               | 5               |         | 6           | 5             |         |
| <b>Age, years</b>                        | 60 (7)          | 69 (8)          | 0.08    | 54 (9)      | 70 (7)        | <0.05   |
| <b>Female gender</b>                     | 1 (20)          | 1 (20)          | NS      | 1 (17)      | 2 (40)        | 0.51    |
| <b>Smoking, current smokers</b>          | 1 (20)          | 0 (0)           | 0.29    | 0 (0)       | 0 (0)         | NS      |
| <b>BMI, Kg/m<sup>2</sup></b>             | 28.2 (1.7)      | 31.5 (6.7)      | 0.25    | 26.8 (3.5)  | 26.6 (4.5)    | 0.86    |
| <b>Triglycerides, mmo/L</b>              | 1.36 (0.31)     | 1.74 (1.00)     | 0.25    | 1.46 (0.88) | 1.05 (0.39)   | 0.52    |
| <b>Cholesterol, mmo/L</b>                | 5.34 (1.14)     | 4.98 (0.64)     | 0.53    | 4.97 (0.79) | 4.50 (1.13)   | 0.27    |
| <b>hsCRP, mg/L</b>                       | 0.68 (0.44)     | 1.95 (1.36)     | 0.08    | 1.63 (1.41) | 33.10 (38.27) | <0.05   |
| <b>Aortic aneurysm and valve disease</b> |                 |                 |         |             |               |         |
| <b>Max ascending aortic diameter, mm</b> | 34.0 (1.9)      | 31.6 (3.7)      | 0.35    | 53.1 (7.9)  | 56.7 (6.2)    | 0.27    |
| <b>Aortic valve stenosis</b>             | 4 (80)          | 4 (80)          | NS      | 3 (50)      | 0 (0)         | 0.06    |
| <b>Aortic valve regurgitation</b>        | 1 (20)          | 1 (20)          | NS      | 3 (50)      | 4 (80)        | 0.30    |
| <b>Medication</b>                        |                 |                 |         |             |               |         |
| <b>Beta blockers</b>                     | 1 (20)          | 3 (60)          | 0.20    | 2 (33)      | 3 (60)        | 0.38    |
| <b>Ca antagonists</b>                    | 1 (20)          | 2 (40)          | 0.49    | 0 (0)       | 1 (20)        | 0.25    |
| <b>ACE inhibitors</b>                    | 1 (20)          | 1 (20)          | NS      | 0 (0)       | 1 (20)        | 0.25    |
| <b>Statins</b>                           | 0 (0)           | 3 (60)          | <0.05   | 1 (17)      | 1 (20)        | 0.89    |

| Parameter <sup>1</sup>                   | BAV Non-dilated | TAV Non-dilated | P-value |
|------------------------------------------|-----------------|-----------------|---------|
| <b>N</b>                                 | 15              | 15              |         |
| <b>Age, years</b>                        | 52 (13)         | 75 (6)          | <0.0001 |
| <b>Female gender</b>                     | 4 (27)          | 6 (40)          | 0.44    |
| <b>Smoking, current smokers</b>          | 2 (13)          | 0 (0)           | 0.14    |
| <b>BMI, Kg/m<sup>2</sup></b>             | 25.3 (4.4)      | 26.1 (3.5)      | 0.82    |
| <b>Triglycerides, mmo/L</b>              | 1.39 (1.50)     | 1.18 (0.62)     | 0.87    |
| <b>Cholesterol, mmo/L</b>                | 5.41 (1.21)     | 4.61 (0.91)     | <0.05   |
| <b>hsCRP, mg/L</b>                       | 5.84 (15.08)    | 2.13 (1.92)     | 0.28    |
| <b>Aortic aneurysm and valve disease</b> |                 |                 |         |
| <b>Max ascending aortic diameter, mm</b> | 33.4 (4.8)      | 30.7 (4.3)      | 0.10    |
| <b>Aortic valve stenosis</b>             | 11 (73)         | 14 (93)         | 0.14    |
| <b>Aortic valve regurgitation</b>        | 4 (27)          | 1 (7)           | 0.14    |
| <b>Medication</b>                        |                 |                 |         |
| <b>Beta blockers</b>                     | 2 (13)          | 9 (60)          | <0.01   |
| <b>Ca antagonists</b>                    | 1 (7)           | 5 (33)          | 0.07    |
| <b>ACE inhibitors</b>                    | 6 (40)          | 6 (40)          | NS      |
| <b>Statins</b>                           | 4 (27)          | 11 (73)         | <0.05   |

| Parameters                               | BAV<br>Non-dilated | TAV<br>Non-dilated | P-<br>value | BAV<br>Dilated | TAV<br>Dilated | P-value |
|------------------------------------------|--------------------|--------------------|-------------|----------------|----------------|---------|
| <b>N</b>                                 | 31                 | 23                 |             | 44             | 21             |         |
| <b>Age, years</b>                        | 58 (10)            | 67 (12)            | <0.01       | 61 (11)        | 63 (14)        | 0.30    |
| <b>Female gender</b>                     | 6 (19)             | 6 (26)             | 0.56        | 11 (25)        | 9 (43)         | 0.14    |
| <b>Smoking, current smokers</b>          | 4 (13)             | 2 (9)              | 0.63        | 5 (11)         | 2 (10)         | 0.82    |
| <b>BMI, Kg/m<sup>2</sup></b>             | 26.7 (5.4)         | 26.8 (4.9)         | 0.91        | 26.2 (3.6)     | 27.1 (3.9)     | 0.51    |
| <b>Triglycerides, mmo/L</b>              | 1.28 (0.55)        | 1.03 (0.41)        | 0.06        | 1.56 (2.00)    | 1.19 (0.65)    | 0.62    |
| <b>Cholesterol, mmo/L</b>                | 5.07 (1.10)        | 5.33 (0.85)        | 0.16        | 5.08 (1.29)    | 4.83 (1.06)    | 0.42    |
| <b>hsCRP, mg/L</b>                       | 2.58 (3.89)        | 4.04 (4.08)        | 0.06        | 2.22 (2.80)    | 6.77 (16.89)   | <0.05   |
| <b>Aortic aneurysm and valve disease</b> |                    |                    |             |                |                |         |
| <b>Max ascending aortic diameter, mm</b> | 35.4 (3.4)         | 32.1 (4.3)         | <0.01       | 50.1 (3.2)     | 54.9 (8.1)     | 0.06    |
| <b>Aortic valve stenosis</b>             | 19 (61)            | 13 (57)            | 0.72        | 30 (68)        | 1 (5)          | <0.0001 |
| <b>Aortic valve regurgitation</b>        | 11 (35)            | 10 (43)            | 0.55        | 11 (25)        | 15 (71)        | <0.001  |
| <b>Medication</b>                        |                    |                    |             |                |                |         |
| <b>Beta blockers</b>                     | 13 (42)            | 10 (43)            | 0.91        | 16 (36)        | 10 (48)        | 0.39    |
| <b>Ca antagonists</b>                    | 4 (13)             | 0 (0)              | 0.07        | 4 (9)          | 2 (10)         | 0.96    |
| <b>ACE inhibitors</b>                    | 6 (19)             | 5 (22)             | 0.83        | 11 (25)        | 6 (29)         | 0.76    |
| <b>Statins</b>                           | 8 (26)             | 2 (9)              | 0.11        | 18 (41)        | 6 (29)         | 0.34    |

BMI, body mass index; hsCRP, high-sensitive C-reactive protein; ACE, Angiotensin-converting enzyme.  
<sup>1</sup>All continuous variables are presented as mean (SD) and ordinal variables are presented as n (%). P values indicate significance for differences between the two groups using a Mann-Whitney test for continuous variables and a Chi-square test for nominal variables. Non-dilated, aorta <40mm; Dilated, aorta >45mm; NS, not significant.

## Supplementary Table 2. Antibodies

|                   |                                                              |
|-------------------|--------------------------------------------------------------|
| CLDN5             | (sc-17667, Santa Cruz Biotechnology), without DIVA treatment |
| CDH5              | (ab33168, Abcam)                                             |
| CDH5-Phospho-Y658 | (ab27775, Abcam)                                             |
| CLTC (Clathrin)   | (Ab2731, Abcam)                                              |
| PTPRB             | (sc-1114, Santa Cruz Biotechnology), without DIVA treatment  |
| ROCK2             | (sc-1851, Santa Cruz Biotechnology)                          |
| MYLK              | (sc-25428, Santa Cruz Biotechnology; H00004638-M01, Abnova)  |
| MYL9              | (ab64161, Abcam)                                             |
| MYL9-Phospho-S19  | (ab64162, Abcam)                                             |
| MYL6              | (sc-109585, Santa Cruz Biotechnology)                        |
| MNFG              | (H00004242-M07, Abnova)                                      |
| KI67              | (ab 16667, Abcam), without DIVA treatment                    |
| ZEB1              | (ab87280, Abcam)                                             |
| Activated NOTCH1  | (ab8925, Abcam)                                              |
| NOTCH3            | (sc-5593, Santa Cruz Biotechnology)                          |
| NOTCH4            | (sc-8644, Santa Cruz Biotechnology)                          |
| JAG1              | (sc-6011, Santa Cruz Biotechnology)                          |
| JAG2              | (sc-5604, Santa Cruz Biotechnology)                          |
| DLL4              | (sc-18640, Santa Cruz Biotechnology)                         |
| vWF               | (A0082, DakoCytomation)                                      |



### Supplementary Table 3. Model parameter values

Model quality parameters of PCA and OPLS-DA. No of PCs refers to the optimal number of PCs for a particular multivariate data model according to cross-validation.  $R_x^2$  accounts for the explained variance while  $Q_y^2$  accounts for the cumulative fraction of the total variation of Y that can be predicted by the model.  $Q_x^2$  accounts for the cumulative fraction of the total variation of X that can be predicted by the model.  $R_y^2$  accounts for the explained variance for the Y component.

#### *PCA model*

| Model description                                          | No of PCs | No of samples | No of proteins | $R_x^2$ | $Q_x^2$ |
|------------------------------------------------------------|-----------|---------------|----------------|---------|---------|
| Non-dilated patients only included - <b>Supp Figure 1a</b> | 2         | 10            | 2894           | 0,42    | 0,04    |
| Dilated patients only included - <b>Supp Figure 1c</b>     | 2         | 11            | 2894           | 0,5     | 0,2     |

#### *OPLS-DA model*

| Model description                                                                            | No of PCs | No of samples | No of proteins | $R_y^2$ | $Q_y^2$ | $R_x^2$ |
|----------------------------------------------------------------------------------------------|-----------|---------------|----------------|---------|---------|---------|
| Non-dilated patients only included, TAV vs BAV discriminant analysis - <b>Supp Figure 1b</b> | 1+3       | 10            | 2894           | 1       | 0,52    | 0,6     |
| Dilated patients only included TAV vs BAV discriminant analysis - <b>Supp Figure 1d</b>      | 1+4       | 11            | 2894           | 1       | 0,88    | 0,75    |

**Supplementary Table 4a.** Loadings and jack-knife (JK) confidence intervals for significant proteins in non-dilated samples, sorted according to loading value. OPLS-DA model is based on TAV and BAV being added as a Y variable. The significance was calculated as ABS (loading) – ABS (jack-knife confidence interval); the positive values indicated significantly expressed proteins.

| Proteins upregulated in BAV non-dilated samples |                                                                                                                                          |                            |             |                                                  |                                          |  |
|-------------------------------------------------|------------------------------------------------------------------------------------------------------------------------------------------|----------------------------|-------------|--------------------------------------------------|------------------------------------------|--|
| Protein accession number                        | Protein name                                                                                                                             | Loading value <sup>a</sup> | Fold change | jack-knife (JK) confidence interval <sup>b</sup> | ABS (Loading value)-ABS(JK) <sup>c</sup> |  |
| Q96RK0                                          | Protein capicua homolog OS=Homo sapiens GN=CIC PE=1 SV=2 - [CIC_HUMAN]                                                                   | 0,046                      | 1,25        | 0,031                                            | 0,015                                    |  |
| P98170                                          | E3 ubiquitin-protein ligase XIAP OS=Homo sapiens GN=XIAP PE=1 SV=2 - [XIAP_HUMAN]                                                        | 0,046                      | 1,18        | 0,022                                            | 0,024                                    |  |
| P46527                                          | Cyclin-dependent kinase inhibitor 1B OS=Homo sapiens GN=CDKN1B PE=1 SV=1 - [CDN1B_HUMAN]                                                 | 0,045                      | 1,59        | 0,016                                            | 0,029                                    |  |
| Q9Y6K1-3                                        | Isoform 3 of DNA (cytosine-5)-methyltransferase 3A OS=Homo sapiens GN=DNMT3A - [DNM3A_HUMAN]                                             | 0,044                      | 1,53        | 0,031                                            | 0,013                                    |  |
| Q15293                                          | Reticulocalbin-1 OS=Homo sapiens GN=RCN1 PE=1 SV=1 - [RCN1_HUMAN]                                                                        | 0,043                      | 1,20        | 0,022                                            | 0,021                                    |  |
| P60900-2                                        | Isoform 2 of Proteasome subunit alpha type-6 OS=Homo sapiens GN=PSMA6 - [PSA6_HUMAN]                                                     | 0,043                      | 1,21        | 0,010                                            | 0,033                                    |  |
| O14964-2                                        | Isoform 2 of Hepatocyte growth factor-regulated tyrosine kinase substrate OS=Homo sapiens GN=HGS - [HGS_HUMAN]                           | 0,043                      | 1,30        | 0,029                                            | 0,014                                    |  |
| Q6UX71                                          | Plexin domain-containing protein 2 OS=Homo sapiens GN=PLXDC2 PE=1 SV=1 - [PXDC2_HUMAN]                                                   | 0,043                      | 1,28        | 0,031                                            | 0,012                                    |  |
| P0CG38                                          | POTE ankyrin domain family member I OS=Homo sapiens GN=POTEI PE=3 SV=1 - [POTEI_HUMAN]                                                   | 0,043                      | 1,45        | 0,021                                            | 0,022                                    |  |
| Q96FW1                                          | Ubiquitin thioesterase OTUB1 OS=Homo sapiens GN=OTUB1 PE=1 SV=2 - [OTUB1_HUMAN]                                                          | 0,043                      | 1,26        | 0,021                                            | 0,022                                    |  |
| P08579                                          | U2 small nuclear ribonucleoprotein B'' OS=Homo sapiens GN=SNRPB2 PE=1 SV=1 - [RU2B_HUMAN]                                                | 0,042                      | 1,31        | 0,027                                            | 0,016                                    |  |
| Q9NSE4                                          | Isoleucine--tRNA ligase, mitochondrial OS=Homo sapiens GN=IARS2 PE=1 SV=2 - [SYIM_HUMAN]                                                 | 0,042                      | 1,16        | 0,022                                            | 0,020                                    |  |
| P80404                                          | 4-aminobutyrate aminotransferase, mitochondrial OS=Homo sapiens GN=ABAT PE=1 SV=3 - [GABT_HUMAN]                                         | 0,042                      | 1,21        | 0,036                                            | 0,005                                    |  |
| Q969E4                                          | Transcription elongation factor A protein-like 3 OS=Homo sapiens GN=TCEAL3 PE=1 SV=1 - [TCAL3_HUMAN]                                     | 0,041                      | 1,21        | 0,029                                            | 0,012                                    |  |
| Q9UKZ1                                          | CCR4-NOT transcription complex subunit 11 OS=Homo sapiens GN=CNOT11 PE=1 SV=1 - [CNO11_HUMAN]                                            | 0,041                      | 1,25        | 0,024                                            | 0,017                                    |  |
| P51689-2                                        | Isoform 2 of Arylsulfatase D OS=Homo sapiens GN=ARSD - [ARSD_HUMAN]                                                                      | 0,041                      | 1,15        | 0,040                                            | 0,002                                    |  |
| P13995-2                                        | Isoform 2 of Bifunctional methylenetetrahydrofolate dehydrogenase/cyclohydrolase, mitochondrial OS=Homo sapiens GN=MTHFD2 - [MTDC_HUMAN] | 0,041                      | 1,63        | 0,028                                            | 0,013                                    |  |
| Q15942                                          | Zyxin OS=Homo sapiens GN=ZYX PE=1 SV=1 - [ZYX_HUMAN]                                                                                     | 0,041                      | 1,37        | 0,026                                            | 0,015                                    |  |
| Q14005-4                                        | Isoform 4 of Pro-interleukin-16 OS=Homo sapiens GN=IL16 - [IL16_HUMAN]                                                                   | 0,041                      | 1,24        | 0,027                                            | 0,014                                    |  |
| Q86YS7-2                                        | Isoform 2 of C2 domain-containing protein 5 OS=Homo sapiens GN=C2CD5 - [C2CD5_HUMAN]                                                     | 0,041                      | 1,11        | 0,035                                            | 0,006                                    |  |
| Q14108                                          | Lysosome membrane protein 2 OS=Homo sapiens GN=SCARB2 PE=1 SV=2 - [SCR2_HUMAN]                                                           | 0,040                      | 1,24        | 0,020                                            | 0,021                                    |  |
| Q8IVN8                                          | Somatomedin-B and thrombospondin type-1 domain-containing protein OS=Homo sapiens GN=SBSPON PE=1 SV=2 - [SBSPON_HUMAN]                   | 0,040                      | 2,11        | 0,030                                            | 0,010                                    |  |

|          |                                                                                                                                                                   |       |      |       |       |
|----------|-------------------------------------------------------------------------------------------------------------------------------------------------------------------|-------|------|-------|-------|
| P48163   | NADP-dependent malic enzyme OS=Homo sapiens GN=ME1 PE=1 SV=1 - [MAOX_HUMAN]                                                                                       | 0,040 | 1,20 | 0,017 | 0,023 |
| P46937-5 | Isoform 5 of Transcriptional coactivator YAP1 OS=Homo sapiens GN=YAP1 - [YAP1_HUMAN]                                                                              | 0,040 | 1,23 | 0,021 | 0,019 |
| Q01105-3 | Isoform 3 of Protein SET OS=Homo sapiens GN=SET - [SET_HUMAN]                                                                                                     | 0,040 | 1,13 | 0,036 | 0,004 |
| Q9NVG8   | TBC1 domain family member 13 OS=Homo sapiens GN=TBC1D13 PE=1 SV=3 - [TBC13_HUMAN]                                                                                 | 0,040 | 1,14 | 0,030 | 0,010 |
| Q9NUJ1   | Mycophenolic acid acyl-glucuronide esterase, mitochondrial OS=Homo sapiens GN=ABHD10 PE=1 SV=1 - [ABHDA_HUMAN]                                                    | 0,040 | 1,42 | 0,015 | 0,025 |
| Q9BRG1   | Vacuolar protein-sorting-associated protein 25 OS=Homo sapiens GN=VPS25 PE=1 SV=1 - [VPS25_HUMAN]                                                                 | 0,040 | 1,34 | 0,031 | 0,008 |
| P10515   | Dihydrolipoyllysine-residue acetyltransferase component of pyruvate dehydrogenase complex, mitochondrial OS=Homo sapiens GN=DLAT PE=1 SV=3 - [ODP2_HUMAN]         | 0,040 | 1,32 | 0,031 | 0,009 |
| Q15120   | [Pyruvate dehydrogenase (acetyl-transferring)] kinase isozyme 3, mitochondrial OS=Homo sapiens GN=PK3 PE=1 SV=1 - [PK3_HUMAN]                                     | 0,039 | 1,15 | 0,024 | 0,015 |
| Q9UK41   | Vacuolar protein sorting-associated protein 28 homolog OS=Homo sapiens GN=VPS28 PE=1 SV=1 - [VPS28_HUMAN]                                                         | 0,039 | 1,50 | 0,035 | 0,004 |
| P35232   | Prohibitin OS=Homo sapiens GN=PHB PE=1 SV=1 - [PHB_HUMAN]                                                                                                         | 0,039 | 1,21 | 0,033 | 0,007 |
| P05166   | Propionyl-CoA carboxylase beta chain, mitochondrial OS=Homo sapiens GN=PCCB PE=1 SV=3 - [PCCB_HUMAN]                                                              | 0,039 | 1,09 | 0,029 | 0,010 |
| Q63ZY3-3 | Isoform 3 of KN motif and ankyrin repeat domain-containing protein 2 OS=Homo sapiens GN=KANK2 - [KANK2_HUMAN]                                                     | 0,039 | 1,17 | 0,012 | 0,027 |
| Q9UBQ0   | Vacuolar protein sorting-associated protein 29 OS=Homo sapiens GN=VPS29 PE=1 SV=1 - [VPS29_HUMAN]                                                                 | 0,039 | 1,47 | 0,023 | 0,016 |
| Q8TF09   | Dynein light chain roadblock-type 2 OS=Homo sapiens GN=DYNLRB2 PE=1 SV=1 - [DLRB2_HUMAN]                                                                          | 0,038 | 1,50 | 0,015 | 0,024 |
| Q8NE01-2 | Isoform 2 of Metal transporter CNNM3 OS=Homo sapiens GN=CNNM3 - [CNNM3_HUMAN]                                                                                     | 0,038 | 1,22 | 0,032 | 0,007 |
| O95208-2 | Isoform 2 of Epsin-2 OS=Homo sapiens GN=EPN2 - [EPN2_HUMAN]                                                                                                       | 0,038 | 1,23 | 0,037 | 0,001 |
| O75083   | WD repeat-containing protein 1 OS=Homo sapiens GN=WDR1 PE=1 SV=4 - [WDR1_HUMAN]                                                                                   | 0,038 | 1,25 | 0,025 | 0,013 |
| P36957   | Dihydrolipoyllysine-residue succinyltransferase component of 2-oxoglutarate dehydrogenase complex, mitochondrial OS=Homo sapiens GN=DLST PE=1 SV=4 - [ODO2_HUMAN] | 0,038 | 1,21 | 0,027 | 0,011 |
| O14907   | Tax1-binding protein 3 OS=Homo sapiens GN=TAX1BP3 PE=1 SV=2 - [TX1B3_HUMAN]                                                                                       | 0,038 | 1,26 | 0,027 | 0,011 |
| P0CG39   | POTE ankyrin domain family member J OS=Homo sapiens GN=POTEJ PE=3 SV=1 - [POTEJ_HUMAN]                                                                            | 0,038 | 1,36 | 0,026 | 0,012 |
| P61020   | Ras-related protein Rab-5B OS=Homo sapiens GN=RAB5B PE=1 SV=1 - [RAB5B_HUMAN]                                                                                     | 0,038 | 1,16 | 0,025 | 0,013 |
| Q15311   | RalA-binding protein 1 OS=Homo sapiens GN=RALBP1 PE=1 SV=3 - [RBP1_HUMAN]                                                                                         | 0,038 | 1,29 | 0,032 | 0,006 |
| Q96RQ3   | Methylcrotonoyl-CoA carboxylase subunit alpha, mitochondrial OS=Homo sapiens GN=MCCC1 PE=1 SV=3 - [MCCA_HUMAN]                                                    | 0,037 | 1,19 | 0,034 | 0,004 |
| Q4G0N4-2 | Isoform 2 of NAD kinase 2, mitochondrial OS=Homo sapiens GN=NADK2 - [NAKD2_HUMAN]                                                                                 | 0,037 | 1,13 | 0,030 | 0,007 |
| Q8TC07-2 | Isoform 2 of TBC1 domain family member 15 OS=Homo sapiens GN=TBC1D15 - [TBC15_HUMAN]                                                                              | 0,037 | 1,34 | 0,032 | 0,005 |
| P49755   | Transmembrane emp24 domain-containing protein 10 OS=Homo sapiens GN=TMED10 PE=1 SV=2 - [TMEDA_HUMAN]                                                              | 0,037 | 1,14 | 0,033 | 0,004 |
| P30047   | GTP cyclohydrolase 1 feedback regulatory protein OS=Homo sapiens GN=GCHFR PE=1 SV=3 - [GFRP_HUMAN]                                                                | 0,037 | 1,18 | 0,033 | 0,004 |
| P55786   | Puromycin-sensitive aminopeptidase OS=Homo sapiens GN=NPEPPS PE=1 SV=2 - [PSA_HUMAN]                                                                              | 0,037 | 1,12 | 0,035 | 0,002 |
| P42226-2 | Isoform 2 of Signal transducer and activator of transcription 6 OS=Homo sapiens GN=STAT6 - [STAT6_HUMAN]                                                          | 0,037 | 1,80 | 0,035 | 0,002 |

|          |                                                                                                                                |       |      |       |       |
|----------|--------------------------------------------------------------------------------------------------------------------------------|-------|------|-------|-------|
| O00291-3 | Isoform 3 of Huntingtin-interacting protein 1 OS=Homo sapiens GN=HIP1 - [HIP1_HUMAN]                                           | 0,037 | 1,18 | 0,035 | 0,002 |
| Q9BY43   | Charged multivesicular body protein 4a OS=Homo sapiens GN=CHMP4A PE=1 SV=3 - [CHM4A_HUMAN]                                     | 0,036 | 1,27 | 0,031 | 0,005 |
| Q6YHK3-4 | Isoform 4 of CD109 antigen OS=Homo sapiens GN=CD109 - [CD109_HUMAN]                                                            | 0,036 | 1,20 | 0,032 | 0,005 |
| Q99714-2 | Isoform 2 of 3-hydroxyacyl-CoA dehydrogenase type-2 OS=Homo sapiens GN=HSD17B10 - [HCD2_HUMAN]                                 | 0,036 | 1,14 | 0,027 | 0,009 |
| O95999   | B-cell lymphoma/leukemia 10 OS=Homo sapiens GN=BCL10 PE=1 SV=1 - [BCL10_HUMAN]                                                 | 0,036 | 1,23 | 0,027 | 0,009 |
| Q15555-4 | Isoform 4 of Microtubule-associated protein RP/EB family member 2 OS=Homo sapiens GN=MAPRE2 - [MARE2_HUMAN]                    | 0,036 | 1,12 | 0,031 | 0,005 |
| Q05209-2 | Isoform 2 of Tyrosine-protein phosphatase non-receptor type 12 OS=Homo sapiens GN=PTPN12 - [PTN12_HUMAN]                       | 0,036 | 1,22 | 0,033 | 0,003 |
| P46926   | Glucosamine-6-phosphate isomerase 1 OS=Homo sapiens GN=GNPDA1 PE=1 SV=1 - [GNPI1_HUMAN]                                        | 0,036 | 1,43 | 0,025 | 0,011 |
| Q15165-3 | Isoform 3 of Serum paraoxonase/arylesterase 2 OS=Homo sapiens GN=PON2 - [PON2_HUMAN]                                           | 0,036 | 1,29 | 0,026 | 0,010 |
| P14649   | Myosin light chain 6B OS=Homo sapiens GN=MYL6B PE=1 SV=1 - [MYL6B_HUMAN]                                                       | 0,035 | 1,12 | 0,034 | 0,002 |
| Q8NBJ7-2 | Isoform 2 of Sulfatase-modifying factor 2 OS=Homo sapiens GN=SUMF2 - [SUMF2_HUMAN]                                             | 0,035 | 1,28 | 0,033 | 0,003 |
| P00367   | Glutamate dehydrogenase 1, mitochondrial OS=Homo sapiens GN=GLUD1 PE=1 SV=2 - [DHE3_HUMAN]                                     | 0,035 | 1,22 | 0,023 | 0,012 |
| Q96I20   | PRKC apoptosis WT1 regulator protein OS=Homo sapiens GN=PAWR PE=1 SV=1 - [PAWR_HUMAN]                                          | 0,035 | 1,13 | 0,022 | 0,013 |
| Q9H8Y8-2 | Isoform 2 of Golgi reassembly-stacking protein 2 OS=Homo sapiens GN=GORASP2 - [GORS2_HUMAN]                                    | 0,035 | 1,26 | 0,033 | 0,002 |
| Q9NR99   | Matrix-remodeling-associated protein 5 OS=Homo sapiens GN=MXRA5 PE=2 SV=3 - [MXRA5_HUMAN]                                      | 0,035 | 1,44 | 0,029 | 0,006 |
| Q00796   | Sorbitol dehydrogenase OS=Homo sapiens GN=SORD PE=1 SV=4 - [DHSO_HUMAN]                                                        | 0,035 | 1,17 | 0,033 | 0,002 |
| P67775-2 | Isoform 2 of Serine/threonine-protein phosphatase 2A catalytic subunit alpha isoform OS=Homo sapiens GN=PPP2CA - [PP2AA_HUMAN] | 0,035 | 1,26 | 0,032 | 0,003 |
| P26440-2 | Isoform 2 of Isovaleryl-CoA dehydrogenase, mitochondrial OS=Homo sapiens GN=IVD - [IVD_HUMAN]                                  | 0,035 | 1,38 | 0,021 | 0,013 |
| Q9HAU0-5 | Isoform 5 of Pleckstrin homology domain-containing family A member 5 OS=Homo sapiens GN=PLEKHA5 - [PKHA5_HUMAN]                | 0,034 | 1,13 | 0,031 | 0,003 |
| Q16891-2 | Isoform 2 of MICOS complex subunit MIC60 OS=Homo sapiens GN=IMMT - [MIC60_HUMAN]                                               | 0,034 | 1,17 | 0,029 | 0,005 |
| O75436   | Vacuolar protein sorting-associated protein 26A OS=Homo sapiens GN=VPS26A PE=1 SV=2 - [VP26A_HUMAN]                            | 0,034 | 1,08 | 0,021 | 0,013 |
| P45880-2 | Isoform 2 of Voltage-dependent anion-selective channel protein 2 OS=Homo sapiens GN=VDAC2 - [VDAC2_HUMAN]                      | 0,034 | 1,27 | 0,034 | 0,000 |
| P09622-2 | Isoform 2 of Dihydrolipoyl dehydrogenase, mitochondrial OS=Homo sapiens GN=DLD - [DLDH_HUMAN]                                  | 0,034 | 1,17 | 0,020 | 0,014 |
| P24043   | Laminin subunit alpha-2 OS=Homo sapiens GN=LAMA2 PE=1 SV=4 - [LAMA2_HUMAN]                                                     | 0,034 | 1,56 | 0,031 | 0,003 |
| Q96KA5-2 | Isoform 2 of Cleft lip and palate transmembrane protein 1-like protein OS=Homo sapiens GN=CLPTM1L - [CLP1L_HUMAN]              | 0,034 | 1,18 | 0,033 | 0,001 |
| Q92843-2 | Isoform 3 of Bcl-2-like protein 2 OS=Homo sapiens GN=BCL2L2 - [B2CL2_HUMAN]                                                    | 0,034 | 1,13 | 0,024 | 0,010 |
| Q96GX2   | Putative ataxin-7-like protein 3B OS=Homo sapiens GN=ATXN7L3B PE=3 SV=2 - [A7L3B_HUMAN]                                        | 0,033 | 1,16 | 0,027 | 0,007 |
| P12111   | Collagen alpha-3(VI) chain OS=Homo sapiens GN=COL6A3 PE=1 SV=5 - [CO6A3_HUMAN]                                                 | 0,033 | 1,34 | 0,031 | 0,003 |

|          |                                                                                                                                       |       |      |       |       |
|----------|---------------------------------------------------------------------------------------------------------------------------------------|-------|------|-------|-------|
| Q14249   | Endonuclease G, mitochondrial OS=Homo sapiens GN=ENDOG PE=1 SV=4 - [NUCG_HUMAN]                                                       | 0,033 | 1,63 | 0,027 | 0,006 |
| P18669   | Phosphoglycerate mutase 1 OS=Homo sapiens GN=PGAM1 PE=1 SV=2 - [PGAM1_HUMAN]                                                          | 0,033 | 1,21 | 0,025 | 0,008 |
| P07902   | Galactose-1-phosphate uridylyltransferase OS=Homo sapiens GN=GALT PE=1 SV=3 - [GALT_HUMAN]                                            | 0,033 | 1,24 | 0,031 | 0,002 |
| P29992   | Guanine nucleotide-binding protein subunit alpha-11 OS=Homo sapiens GN=GNA11 PE=1 SV=2 - [GNA11_HUMAN]                                | 0,033 | 1,44 | 0,021 | 0,012 |
| Q9Y2H6-2 | Isoform 2 of Fibronectin type-III domain-containing protein 3A OS=Homo sapiens GN=FND3A - [FND3A_HUMAN]                               | 0,033 | 1,19 | 0,025 | 0,008 |
| O00330-2 | Isoform 2 of Pyruvate dehydrogenase protein X component, mitochondrial OS=Homo sapiens GN=PDHX - [ODPX_HUMAN]                         | 0,033 | 1,20 | 0,025 | 0,008 |
| P28300   | Protein-lysine 6-oxidase OS=Homo sapiens GN=LOX PE=1 SV=2 - [LYOX_HUMAN]                                                              | 0,033 | 1,93 | 0,030 | 0,003 |
| P54922   | [Protein ADP-ribosylarginine] hydrolase OS=Homo sapiens GN=ADPRH PE=1 SV=1 - [ADPRH_HUMAN]                                            | 0,033 | 1,23 | 0,032 | 0,001 |
| Q96C86   | m7GpppX diphosphatase OS=Homo sapiens GN=DCPS PE=1 SV=2 - [DCPS_HUMAN]                                                                | 0,033 | 1,14 | 0,030 | 0,003 |
| O95967   | EGF-containing fibulin-like extracellular matrix protein 2 OS=Homo sapiens GN=EFEMP2 PE=1 SV=3 - [FBLN4_HUMAN]                        | 0,033 | 1,44 | 0,029 | 0,003 |
| Q9GZU7-2 | Isoform 2 of Carboxy-terminal domain RNA polymerase II polypeptide A small phosphatase 1 OS=Homo sapiens GN=CTDSP1 - [CTDS1_HUMAN]    | 0,032 | 1,12 | 0,030 | 0,002 |
| P63151   | Serine/threonine-protein phosphatase 2A 55 kDa regulatory subunit B alpha isoform OS=Homo sapiens GN=PPP2R2A PE=1 SV=1 - [2ABA_HUMAN] | 0,032 | 1,38 | 0,027 | 0,005 |
| O00764-2 | Isoform 2 of Pyridoxal kinase OS=Homo sapiens GN=PDXX - [PDXX_HUMAN]                                                                  | 0,032 | 1,29 | 0,028 | 0,004 |
| Q9H444   | Charged multivesicular body protein 4b OS=Homo sapiens GN=CHMP4B PE=1 SV=1 - [CHM4B_HUMAN]                                            | 0,032 | 1,26 | 0,023 | 0,009 |
| P25942   | Tumor necrosis factor receptor superfamily member 5 OS=Homo sapiens GN=CD40 PE=1 SV=1 - [TNRS_HUMAN]                                  | 0,032 | 1,23 | 0,030 | 0,002 |
| Q9UJU6   | Drebrin-like protein OS=Homo sapiens GN=DBNL PE=1 SV=1 - [DBNL_HUMAN]                                                                 | 0,032 | 1,39 | 0,019 | 0,012 |
| P46109   | Crk-like protein OS=Homo sapiens GN=CRKL PE=1 SV=1 - [CRKL_HUMAN]                                                                     | 0,032 | 1,23 | 0,030 | 0,001 |
| A6NIH7   | Protein unc-119 homolog B OS=Homo sapiens GN=UNC119B PE=1 SV=1 - [U119B_HUMAN]                                                        | 0,032 | 1,26 | 0,023 | 0,009 |
| Q9P0L0   | Vesicle-associated membrane protein-associated protein A OS=Homo sapiens GN=VAPA PE=1 SV=3 - [VAPA_HUMAN]                             | 0,031 | 1,13 | 0,029 | 0,002 |
| P49593   | Protein phosphatase 1F OS=Homo sapiens GN=PPM1F PE=1 SV=3 - [PPM1F_HUMAN]                                                             | 0,031 | 1,15 | 0,022 | 0,009 |
| P62070-3 | Isoform 3 of Ras-related protein R-Ras2 OS=Homo sapiens GN=RRAS2 - [RRAS2_HUMAN]                                                      | 0,031 | 1,46 | 0,024 | 0,007 |
| Q9UHG3   | Preylcysteine oxidase 1 OS=Homo sapiens GN=PCYOX1 PE=1 SV=3 - [PCYOX_HUMAN]                                                           | 0,031 | 1,15 | 0,031 | 0,000 |
| Q92542-2 | Isoform 2 of Nicastrin OS=Homo sapiens GN=NCSTN - [NICA_HUMAN]                                                                        | 0,031 | 1,32 | 0,027 | 0,004 |
| Q03135   | Caveolin-1 OS=Homo sapiens GN=CAV1 PE=1 SV=4 - [CAV1_HUMAN]                                                                           | 0,031 | 1,11 | 0,028 | 0,003 |
| P61158   | Actin-related protein 3 OS=Homo sapiens GN=ACTR3 PE=1 SV=3 - [ARP3_HUMAN]                                                             | 0,031 | 1,08 | 0,027 | 0,004 |
| Q9ULC3   | Ras-related protein Rab-23 OS=Homo sapiens GN=RAB23 PE=1 SV=1 - [RAB23_HUMAN]                                                         | 0,031 | 1,21 | 0,019 | 0,011 |
| O00410   | Importin-5 OS=Homo sapiens GN=IPOS5 PE=1 SV=4 - [IPOS_HUMAN]                                                                          | 0,030 | 1,23 | 0,026 | 0,004 |
| Q08379   | Golgin subfamily A member 2 OS=Homo sapiens GN=GOLGA2 PE=1 SV=3 - [GOGA2_HUMAN]                                                       | 0,030 | 1,45 | 0,025 | 0,005 |
| P07741   | Adenine phosphoribosyltransferase OS=Homo sapiens GN=APRT PE=1 SV=2 - [APT_HUMAN]                                                     | 0,030 | 1,10 | 0,027 | 0,004 |
| Q07507   | Dermatopontin OS=Homo sapiens GN=DPT PE=1 SV=2 - [DERM_HUMAN]                                                                         | 0,030 | 1,41 | 0,029 | 0,001 |
| Q6NZI2   | Polymerase I and transcript release factor OS=Homo sapiens GN=PTRF PE=1 SV=1 - [PTRF_HUMAN]                                           | 0,030 | 1,13 | 0,022 | 0,009 |

|           |                                                                                                                     |       |      |       |       |
|-----------|---------------------------------------------------------------------------------------------------------------------|-------|------|-------|-------|
| O43739-2  | Isoform 2 of Cytohesin-3 OS=Homo sapiens GN=CYTH3 - [CYH3_HUMAN]                                                    | 0,030 | 1,12 | 0,021 | 0,008 |
| O00468-6  | Isoform 6 of Agrin OS=Homo sapiens GN=AGRN - [AGRIN_HUMAN]                                                          | 0,029 | 1,45 | 0,016 | 0,013 |
| P08865    | 40S ribosomal protein SA OS=Homo sapiens GN=RPSA PE=1 SV=4 - [RSSA_HUMAN]                                           | 0,029 | 1,21 | 0,018 | 0,011 |
| Q93052    | Lipoma-preferred partner OS=Homo sapiens GN=LPP PE=1 SV=1 - [LPP_HUMAN]                                             | 0,029 | 1,15 | 0,025 | 0,004 |
| P25325    | 3-mercaptopyruvate sulfurtransferase OS=Homo sapiens GN=MPST PE=1 SV=3 - [THTM_HUMAN]                               | 0,029 | 1,52 | 0,025 | 0,004 |
| P07108    | Acyl-CoA-binding protein OS=Homo sapiens GN=DBI PE=1 SV=2 - [ACBP_HUMAN]                                            | 0,029 | 1,31 | 0,020 | 0,009 |
| P34741    | Syndecan-2 OS=Homo sapiens GN=SDC2 PE=1 SV=2 - [SDC2_HUMAN]                                                         | 0,029 | 1,20 | 0,024 | 0,005 |
| Q9HB71    | Calcyclin-binding protein OS=Homo sapiens GN=CACYBP PE=1 SV=2 - [CYBP_HUMAN]                                        | 0,028 | 1,13 | 0,028 | 0,001 |
| P61923    | Coatomer subunit zeta-1 OS=Homo sapiens GN=COPZ1 PE=1 SV=1 - [COPZ1_HUMAN]                                          | 0,028 | 1,18 | 0,027 | 0,002 |
| Q9Y508-2  | Isoform 2 of E3 ubiquitin-protein ligase RNF114 OS=Homo sapiens GN=RNF114 - [RN114_HUMAN]                           | 0,028 | 1,13 | 0,026 | 0,002 |
| Q8IWI45-4 | Isoform 4 of ATP-dependent (S)-NAD(P)H-hydrate dehydratase OS=Homo sapiens GN=CARKD - [NNRD_HUMAN]                  | 0,028 | 1,13 | 0,027 | 0,001 |
| Q92597    | Protein NDRG1 OS=Homo sapiens GN=NDRG1 PE=1 SV=1 - [NDRG1_HUMAN]                                                    | 0,028 | 1,18 | 0,024 | 0,004 |
| O75718    | Cartilage-associated protein OS=Homo sapiens GN=CRTAP PE=1 SV=1 - [CRTAP_HUMAN]                                     | 0,027 | 1,45 | 0,026 | 0,001 |
| Q12929    | Epidermal growth factor receptor kinase substrate 8 OS=Homo sapiens GN=EPS8 PE=1 SV=1 - [EPS8_HUMAN]                | 0,027 | 1,11 | 0,024 | 0,003 |
| O60279    | Sushi domain-containing protein 5 OS=Homo sapiens GN=SUSD5 PE=1 SV=3 - [SUSD5_HUMAN]                                | 0,027 | 1,27 | 0,026 | 0,002 |
| Q96TA1-2  | Isoform 2 of Niban-like protein 1 OS=Homo sapiens GN=FAM129B - [NIBL1_HUMAN]                                        | 0,027 | 1,15 | 0,019 | 0,008 |
| Q15785    | Mitochondrial import receptor subunit TOM34 OS=Homo sapiens GN=TOMM34 PE=1 SV=2 - [TOM34_HUMAN]                     | 0,027 | 1,36 | 0,025 | 0,003 |
| P11177-2  | Isoform 2 of Pyruvate dehydrogenase E1 component subunit beta, mitochondrial OS=Homo sapiens GN=PDHB - [ODPB_HUMAN] | 0,027 | 1,19 | 0,020 | 0,008 |
| Q15019    | Septin-2 OS=Homo sapiens GN=SEPT2 PE=1 SV=1 - [SEPT2_HUMAN]                                                         | 0,027 | 1,08 | 0,019 | 0,008 |
| O60936    | Nucleolar protein 3 OS=Homo sapiens GN=NOL3 PE=1 SV=2 - [NOL3_HUMAN]                                                | 0,027 | 1,25 | 0,020 | 0,006 |
| P20774    | Mimecan OS=Homo sapiens GN=OGN PE=1 SV=1 - [MIME_HUMAN]                                                             | 0,027 | 1,32 | 0,022 | 0,005 |
| P53680-2  | Isoform 2 of AP-2 complex subunit sigma OS=Homo sapiens GN=AP2S1 - [AP2S1_HUMAN]                                    | 0,027 | 1,16 | 0,021 | 0,006 |
| P43034    | Platelet-activating factor acetylhydrolase IB subunit alpha OS=Homo sapiens GN=PFAFH1B1 PE=1 SV=2 - [LIS1_HUMAN]    | 0,025 | 1,19 | 0,017 | 0,009 |
| P04275    | von Willebrand factor OS=Homo sapiens GN=VWF PE=1 SV=4 - [VWF_HUMAN]                                                | 0,025 | 1,79 | 0,021 | 0,004 |
| Q15286    | Ras-related protein Rab-35 OS=Homo sapiens GN=RAB35 PE=1 SV=1 - [RAB35_HUMAN]                                       | 0,025 | 1,29 | 0,017 | 0,009 |
| Q16363-2  | Isoform 2 of Laminin subunit alpha-4 OS=Homo sapiens GN=LAMA4 - [LAMA4_HUMAN]                                       | 0,025 | 1,24 | 0,021 | 0,004 |
| Q13043-2  | Isoform 2 of Serine/threonine-protein kinase 4 OS=Homo sapiens GN=STK4 - [STK4_HUMAN]                               | 0,025 | 1,12 | 0,020 | 0,005 |
| Q8TF74-2  | Isoform 2 of WAS/WASL-interacting protein family member 2 OS=Homo sapiens GN=WIPF2 - [WIPF2_HUMAN]                  | 0,025 | 1,33 | 0,022 | 0,002 |
| Q7Z304    | MAM domain-containing protein 2 OS=Homo sapiens GN=MAMDC2 PE=2 SV=3 - [MAMC2_HUMAN]                                 | 0,025 | 1,75 | 0,019 | 0,006 |
| P21810    | Biglycan OS=Homo sapiens GN=BGN PE=1 SV=2 - [PGS1_HUMAN]                                                            | 0,024 | 1,33 | 0,018 | 0,007 |
| O43760    | Synaptogyrin-2 OS=Homo sapiens GN=SYNGR2 PE=1 SV=1 - [SNG2_HUMAN]                                                   | 0,024 | 1,29 | 0,020 | 0,004 |
| Q92626    | Peroxidasin homolog OS=Homo sapiens GN=PXDN PE=1 SV=2 - [PXDN_HUMAN]                                                | 0,024 | 1,19 | 0,019 | 0,004 |
| Q15907-2  | Isoform 2 of Ras-related protein Rab-11B OS=Homo sapiens GN=RAB11B - [RB11B_HUMAN]                                  | 0,024 | 1,28 | 0,021 | 0,003 |

|          |                                                                                                              |       |      |       |       |
|----------|--------------------------------------------------------------------------------------------------------------|-------|------|-------|-------|
| Q8IWU6   | Extracellular sulfatase Sulf-1 OS=Homo sapiens GN=SULF1 PE=1 SV=1 - [SULF1_HUMAN]                            | 0,023 | 1,55 | 0,016 | 0,008 |
| P11279   | Lysosome-associated membrane glycoprotein 1 OS=Homo sapiens GN=LAMP1 PE=1 SV=3 - [LAMP1_HUMAN]               | 0,023 | 1,39 | 0,013 | 0,009 |
| Q86X52   | Chondroitin sulfate synthase 1 OS=Homo sapiens GN=CHSY1 PE=1 SV=3 - [CHSS1_HUMAN]                            | 0,022 | 1,33 | 0,021 | 0,001 |
| Q96CG8-3 | Isoform 3 of Collagen triple helix repeat-containing protein 1 OS=Homo sapiens GN=CTHRC1 - [CTHR1_HUMAN]     | 0,020 | 1,30 | 0,013 | 0,007 |
| O00300   | Tumor necrosis factor receptor superfamily member 11B OS=Homo sapiens GN=TNFRSF11B PE=1 SV=3 - [TR11B_HUMAN] | 0,020 | 1,37 | 0,015 | 0,005 |
| Q9H8L6   | Multimerin-2 OS=Homo sapiens GN=MMRN2 PE=1 SV=2 - [MMRN2_HUMAN]                                              | 0,020 | 1,76 | 0,017 | 0,003 |
| Q96C24-2 | Isoform 2 of Synaptotagmin-like protein 4 OS=Homo sapiens GN=SYTL4 - [SYTL4_HUMAN]                           | 0,018 | 1,44 | 0,013 | 0,005 |

**Proteins downregulated in BAV non-dilated samples**

| <b>Protein accession number</b> | <b>Protein name</b>                                                                                                                      | <b>Loading value<sup>a</sup></b> | <b>Fold change</b> | <b>jack-knife (JK) confidence interval<sup>b</sup></b> | <b>ABS (Loading value)-ABS(JK)<sup>c</sup></b> |
|---------------------------------|------------------------------------------------------------------------------------------------------------------------------------------|----------------------------------|--------------------|--------------------------------------------------------|------------------------------------------------|
| P01603                          | Ig kappa chain V-I region Ka OS=Homo sapiens PE=1 SV=1 - [KV111_HUMAN]                                                                   | -0,050                           | 0,67               | 0,016                                                  | 0,034                                          |
| P17980                          | 26S protease regulatory subunit 6A OS=Homo sapiens GN=PSMC3 PE=1 SV=3 - [PRS6A_HUMAN]                                                    | -0,047                           | 0,93               | 0,031                                                  | 0,016                                          |
| P01612                          | Ig kappa chain V-I region Mev OS=Homo sapiens PE=1 SV=1 - [KV120_HUMAN]                                                                  | -0,047                           | 0,68               | 0,021                                                  | 0,026                                          |
| Q6DHV7-2                        | Isoform 2 of Adenosine deaminase-like protein OS=Homo sapiens GN=ADAL - [ADAL_HUMAN]                                                     | -0,046                           | 0,73               | 0,023                                                  | 0,023                                          |
| O43150-2                        | Isoform 2 of Arf-GAP with SH3 domain, ANK repeat and PH domain-containing protein 2 OS=Homo sapiens GN=ASAP2 - [ASAP2_HUMAN]             | -0,045                           | 0,80               | 0,015                                                  | 0,031                                          |
| Q9UH62                          | Armadillo repeat-containing X-linked protein 3 OS=Homo sapiens GN=ARMCX3 PE=1 SV=1 - [ARMX3_HUMAN]                                       | -0,044                           | 0,70               | 0,018                                                  | 0,027                                          |
| Q16537-2                        | Isoform 2 of Serine/threonine-protein phosphatase 2A 56 kDa regulatory subunit epsilon isoform OS=Homo sapiens GN=PPP2R5E - [2A5E_HUMAN] | -0,044                           | 0,91               | 0,026                                                  | 0,018                                          |
| Q9H6S3                          | Epidermal growth factor receptor kinase substrate 8-like protein 2 OS=Homo sapiens GN=EPS8L2 PE=1 SV=2 - [ES8L2_HUMAN]                   | -0,044                           | 0,84               | 0,025                                                  | 0,018                                          |
| Q9H6T3-2                        | Isoform 2 of RNA polymerase II-associated protein 3 OS=Homo sapiens GN=RPAP3 - [RPAP3_HUMAN]                                             | -0,042                           | 0,80               | 0,028                                                  | 0,014                                          |
| Q9NR09                          | Baculoviral IAP repeat-containing protein 6 OS=Homo sapiens GN=BIRC6 PE=1 SV=2 - [BIRC6_HUMAN]                                           | -0,041                           | 0,77               | 0,028                                                  | 0,013                                          |
| P00738                          | Haptoglobin OS=Homo sapiens GN=HP PE=1 SV=1 - [HPT_HUMAN]                                                                                | -0,041                           | 0,53               | 0,015                                                  | 0,026                                          |
| P01766                          | Ig heavy chain V-III region BRO OS=Homo sapiens PE=1 SV=1 - [HV305_HUMAN]                                                                | -0,041                           | 0,75               | 0,024                                                  | 0,017                                          |
| P01137                          | Transforming growth factor beta-1 OS=Homo sapiens GN=TGFB1 PE=1 SV=2 - [TGFB1_HUMAN]                                                     | -0,041                           | 0,74               | 0,029                                                  | 0,012                                          |
| P10114                          | Ras-related protein Rap-2a OS=Homo sapiens GN=RAP2A PE=1 SV=1 - [RAP2A_HUMAN]                                                            | -0,041                           | 0,48               | 0,038                                                  | 0,003                                          |
| P00751                          | Complement factor B OS=Homo sapiens GN=CFB PE=1 SV=2 - [CFAB_HUMAN]                                                                      | -0,040                           | 0,69               | 0,014                                                  | 0,026                                          |
| Q6P179-3                        | Isoform 3 of Endoplasmic reticulum aminopeptidase 2 OS=Homo sapiens GN=ERAP2 - [ERAP2_HUMAN]                                             | -0,040                           | 0,67               | 0,026                                                  | 0,015                                          |
| Q8TBB5-2                        | Isoform 2 of Kelch domain-containing protein 4 OS=Homo sapiens GN=KLHDC4 - [KLDC4_HUMAN]                                                 | -0,040                           | 0,69               | 0,028                                                  | 0,012                                          |
| P30443                          | HLA class I histocompatibility antigen, A-1 alpha chain OS=Homo sapiens GN=HLA-A PE=1 SV=1 - [1A01_HUMAN]                                | -0,040                           | 0,18               | 0,019                                                  | 0,021                                          |

|           |                                                                                                                    |        |      |       |       |
|-----------|--------------------------------------------------------------------------------------------------------------------|--------|------|-------|-------|
| Q9H4A4    | Aminopeptidase B OS=Homo sapiens GN=RNPEP PE=1 SV=2 - [AMPB_HUMAN]                                                 | -0,040 | 0,76 | 0,031 | 0,008 |
| P01834    | Ig kappa chain C region OS=Homo sapiens GN=IGKC PE=1 SV=1 - [IGKC_HUMAN]                                           | -0,040 | 0,56 | 0,025 | 0,015 |
| Q15386    | Ubiquitin-protein ligase E3C OS=Homo sapiens GN=UBE3C PE=1 SV=3 - [UBE3C_HUMAN]                                    | -0,039 | 0,68 | 0,032 | 0,007 |
| Q9NP78-3  | Isoform 3 of ATP-binding cassette sub-family B member 9 OS=Homo sapiens GN=ABCB9 - [ABCB9_HUMAN]                   | -0,039 | 0,44 | 0,019 | 0,020 |
| Q07812-5  | Isoform Epsilon of Apoptosis regulator BAX OS=Homo sapiens GN=BAX - [BAX_HUMAN]                                    | -0,039 | 0,90 | 0,031 | 0,008 |
| P01596    | Ig kappa chain V-I region CAR OS=Homo sapiens PE=1 SV=1 - [KV104_HUMAN]                                            | -0,039 | 0,78 | 0,033 | 0,006 |
| Q15813    | Tubulin-specific chaperone E OS=Homo sapiens GN=TBCE PE=1 SV=1 - [TBCE_HUMAN]                                      | -0,039 | 0,89 | 0,022 | 0,016 |
| P01594    | Ig kappa chain V-I region AU OS=Homo sapiens PE=1 SV=1 - [KV102_HUMAN]                                             | -0,038 | 0,75 | 0,023 | 0,015 |
| Q8I WV7   | E3 ubiquitin-protein ligase UBR1 OS=Homo sapiens GN=UBR1 PE=1 SV=1 - [UBR1_HUMAN]                                  | -0,038 | 0,81 | 0,025 | 0,013 |
| P01605    | Ig kappa chain V-I region Lay OS=Homo sapiens PE=1 SV=1 - [KV113_HUMAN]                                            | -0,038 | 0,78 | 0,026 | 0,012 |
| Q6IQ22    | Ras-related protein Rab-12 OS=Homo sapiens GN=RAB12 PE=1 SV=3 - [RAB12_HUMAN]                                      | -0,038 | 0,76 | 0,028 | 0,011 |
| O43670-2  | Isoform 2 of BUB3-interacting and GLEBS motif-containing protein ZNF207 OS=Homo sapiens GN=ZNF207 - [ZNF207_HUMAN] | -0,038 | 0,85 | 0,035 | 0,003 |
| P04424-3  | Isoform 3 of Argininosuccinate lyase OS=Homo sapiens GN=ASL - [ARLY_HUMAN]                                         | -0,038 | 0,81 | 0,021 | 0,018 |
| Q13310-2  | Isoform 2 of Polyadenylate-binding protein 4 OS=Homo sapiens GN=PABPC4 - [PABP4_HUMAN]                             | -0,038 | 0,85 | 0,032 | 0,006 |
| P15586-2  | Isoform 2 of N-acetylglucosamine-6-sulfatase OS=Homo sapiens GN=GNS - [GNS_HUMAN]                                  | -0,037 | 0,89 | 0,031 | 0,006 |
| A5D8V6    | Vacuolar protein sorting-associated protein 37C OS=Homo sapiens GN=VPS37C PE=1 SV=2 - [VP37C_HUMAN]                | -0,037 | 0,86 | 0,030 | 0,007 |
| P52790    | Hexokinase-3 OS=Homo sapiens GN=HK3 PE=1 SV=2 - [HXK3_HUMAN]                                                       | -0,037 | 0,62 | 0,021 | 0,015 |
| Q9UGT4    | Sushi domain-containing protein 2 OS=Homo sapiens GN=SUSD2 PE=1 SV=1 - [SUSD2_HUMAN]                               | -0,037 | 0,65 | 0,032 | 0,005 |
| P61221    | ATP-binding cassette sub-family E member 1 OS=Homo sapiens GN=ABCE1 PE=1 SV=1 - [ABCE1_HUMAN]                      | -0,037 | 0,86 | 0,029 | 0,008 |
| Q6ZVK8-2  | Isoform 2 of 8-oxo-dGDP phosphatase NUDT18 OS=Homo sapiens GN=NUDT18 - [NUDT18_HUMAN]                              | -0,036 | 0,76 | 0,028 | 0,009 |
| Q7Z478    | ATP-dependent RNA helicase DHX29 OS=Homo sapiens GN=DHX29 PE=1 SV=2 - [DHX29_HUMAN]                                | -0,036 | 0,89 | 0,030 | 0,006 |
| Q8IXT5    | RNA-binding protein 12B OS=Homo sapiens GN=RBM12B PE=1 SV=2 - [RB12B_HUMAN]                                        | -0,036 | 0,75 | 0,027 | 0,010 |
| P06681    | Complement C2 OS=Homo sapiens GN=C2 PE=1 SV=2 - [CO2_HUMAN]                                                        | -0,036 | 0,69 | 0,017 | 0,019 |
| P41227-2  | Isoform 2 of N-alpha-acetyltransferase 10 OS=Homo sapiens GN=NAA10 - [NAA10_HUMAN]                                 | -0,036 | 0,80 | 0,034 | 0,002 |
| Q7Z6Z7-2  | Isoform 2 of E3 ubiquitin-protein ligase HUWE1 OS=Homo sapiens GN=HUWE1 - [HUWE1_HUMAN]                            | -0,036 | 0,87 | 0,030 | 0,006 |
| Q8NG68    | Tubulin--tyrosine ligase OS=Homo sapiens GN=TTL PE=1 SV=2 - [TTL_HUMAN]                                            | -0,036 | 0,74 | 0,034 | 0,002 |
| P48735-2  | Isoform 2 of Isocitrate dehydrogenase [NADP], mitochondrial OS=Homo sapiens GN=IDH2 - [IDHP_HUMAN]                 | -0,036 | 0,88 | 0,027 | 0,009 |
| O75348    | V-type proton ATPase subunit G 1 OS=Homo sapiens GN=ATP6V1G1 PE=1 SV=3 - [VATG1_HUMAN]                             | -0,036 | 0,87 | 0,034 | 0,002 |
| P49789    | Bis(5'-adenosyl)-triphosphatase OS=Homo sapiens GN=FHIT PE=1 SV=3 - [FHIT_HUMAN]                                   | -0,036 | 0,87 | 0,036 | 0,000 |
| Q99832    | T-complex protein 1 subunit eta OS=Homo sapiens GN=CCT7 PE=1 SV=2 - [TCPH_HUMAN]                                   | -0,036 | 0,94 | 0,026 | 0,009 |
| Q8N108-17 | Isoform 7 of Mesoderm induction early response protein 1 OS=Homo sapiens GN=MIER1 - [MIER1_HUMAN]                  | -0,035 | 0,79 | 0,028 | 0,008 |
| Q9NR45    | Sialic acid synthase OS=Homo sapiens GN=NANS PE=1 SV=2 - [SIAS_HUMAN]                                              | -0,035 | 0,80 | 0,027 | 0,008 |
| P42858    | Huntingtin OS=Homo sapiens GN=HTT PE=1 SV=2 - [HD_HUMAN]                                                           | -0,035 | 0,77 | 0,025 | 0,010 |



|          |                                                                                                       |        |      |       |       |
|----------|-------------------------------------------------------------------------------------------------------|--------|------|-------|-------|
| Q5TZA2   | Rootletin OS=Homo sapiens GN=CROCC PE=1 SV=1 - [CROCC_HUMAN]                                          | -0,035 | 0,84 | 0,027 | 0,008 |
| P04434   | Ig kappa chain V-III region VH (Fragment) OS=Homo sapiens PE=4 SV=1 - [KV310_HUMAN]                   | -0,035 | 0,62 | 0,030 | 0,005 |
| P01024   | Complement C3 OS=Homo sapiens GN=C3 PE=1 SV=2 - [CO3_HUMAN]                                           | -0,035 | 0,67 | 0,023 | 0,012 |
| Q5M775   | Cytospin-B OS=Homo sapiens GN=SPECC1 PE=1 SV=1 - [CYTSB_HUMAN]                                        | -0,035 | 0,74 | 0,032 | 0,002 |
| P27361   | Mitogen-activated protein kinase 3 OS=Homo sapiens GN=MAPK3 PE=1 SV=4 - [MK03_HUMAN]                  | -0,035 | 0,89 | 0,034 | 0,000 |
| P09455   | Retinol-binding protein 1 OS=Homo sapiens GN=RBP1 PE=1 SV=2 - [RET1_HUMAN]                            | -0,035 | 0,78 | 0,020 | 0,015 |
| P29622   | Kallistatin OS=Homo sapiens GN=SERPINA4 PE=1 SV=3 - [KAIN_HUMAN]                                      | -0,034 | 0,72 | 0,029 | 0,006 |
| Q9Y263   | Phospholipase A-2-activating protein OS=Homo sapiens GN=PLAA PE=1 SV=2 - [PLAP_HUMAN]                 | -0,034 | 0,79 | 0,024 | 0,010 |
| Q92859-2 | Isoform 2 of Neogenin OS=Homo sapiens GN=NEO1 - [NEO1_HUMAN]                                          | -0,034 | 0,84 | 0,033 | 0,001 |
| O00231   | 26S proteasome non-ATPase regulatory subunit 11 OS=Homo sapiens GN=PSMD11 PE=1 SV=3 - [PSD11_HUMAN]   | -0,034 | 0,85 | 0,018 | 0,016 |
| Q9NYL9   | Tropomodulin-3 OS=Homo sapiens GN=TMOD3 PE=1 SV=1 - [TMOD3_HUMAN]                                     | -0,034 | 0,75 | 0,028 | 0,006 |
| P13716   | Delta-aminolevulinic acid dehydratase OS=Homo sapiens GN=ALAD PE=1 SV=1 - [HEM2_HUMAN]                | -0,034 | 0,72 | 0,025 | 0,008 |
| Q96GZ6-6 | Isoform 6 of Solute carrier family 41 member 3 OS=Homo sapiens GN=SLC41A3 - [S41A3_HUMAN]             | -0,034 | 0,73 | 0,032 | 0,001 |
| O14939-4 | Isoform PLD2B of Phospholipase D2 OS=Homo sapiens GN=PLD2 - [PLD2_HUMAN]                              | -0,033 | 0,85 | 0,029 | 0,005 |
| P0CG05   | Ig lambda-2 chain C regions OS=Homo sapiens GN=IGLC2 PE=1 SV=1 - [LAC2_HUMAN]                         | -0,033 | 0,66 | 0,031 | 0,002 |
| Q8N163   | Cell cycle and apoptosis regulator protein 2 OS=Homo sapiens GN=CCAR2 PE=1 SV=2 - [CCAR2_HUMAN]       | -0,033 | 0,70 | 0,022 | 0,011 |
| Q9H0D6-2 | Isoform 2 of 5'-3' exoribonuclease 2 OS=Homo sapiens GN=XRN2 - [XRN2_HUMAN]                           | -0,033 | 0,71 | 0,023 | 0,010 |
| Q9H357   | Tyrosine-protein phosphatase non-receptor type 23 OS=Homo sapiens GN=PTPN23 PE=1 SV=1 - [PTN23_HUMAN] | -0,033 | 0,89 | 0,028 | 0,005 |
| Q9HBI0-3 | Isoform 3 of Gamma-parvin OS=Homo sapiens GN=PARVG - [PARVG_HUMAN]                                    | -0,033 | 0,69 | 0,029 | 0,004 |
| P01857   | Ig gamma-1 chain C region OS=Homo sapiens GN=IGHG1 PE=1 SV=1 - [IGHG1_HUMAN]                          | -0,033 | 0,65 | 0,032 | 0,001 |
| Q9BSB4   | Autophagy-related protein 101 OS=Homo sapiens GN=ATG101 PE=1 SV=1 - [ATGA1_HUMAN]                     | -0,033 | 0,83 | 0,031 | 0,002 |
| Q9NSY0   | Nuclear receptor-binding protein 2 OS=Homo sapiens GN=NRBP2 PE=2 SV=2 - [NRBP2_HUMAN]                 | -0,032 | 0,85 | 0,030 | 0,003 |
| P20339-2 | Isoform 2 of Ras-related protein Rab-5A OS=Homo sapiens GN=RAB5A - [RAB5A_HUMAN]                      | -0,032 | 0,70 | 0,027 | 0,005 |
| P30566   | Adenylosuccinate lyase OS=Homo sapiens GN=ADSL PE=1 SV=2 - [PUR8_HUMAN]                               | -0,032 | 0,79 | 0,032 | 0,000 |
| Q9NTJ4-3 | Isoform 3 of Alpha-mannosidase 2C1 OS=Homo sapiens GN=MAN2C1 - [MA2C1_HUMAN]                          | -0,032 | 0,81 | 0,028 | 0,005 |
| P06865   | Beta-hexosaminidase subunit alpha OS=Homo sapiens GN=HEXA PE=1 SV=2 - [HEXA_HUMAN]                    | -0,032 | 0,88 | 0,032 | 0,000 |
| P57076   | UPF0769 protein C21orf59 OS=Homo sapiens GN=C21orf59 PE=1 SV=1 - [CU059_HUMAN]                        | -0,032 | 0,81 | 0,027 | 0,006 |
| P17544-5 | Isoform 5 of Cyclic AMP-dependent transcription factor ATF-7 OS=Homo sapiens GN=ATF7 - [ATF7_HUMAN]   | -0,032 | 0,74 | 0,028 | 0,004 |
| P01743   | Ig heavy chain V-I region HG3 OS=Homo sapiens PE=3 SV=1 - [HV102_HUMAN]                               | -0,032 | 0,65 | 0,032 | 0,000 |
| Q8IXB1-2 | Isoform 2 of DnaJ homolog subfamily C member 10 OS=Homo sapiens GN=DNAJC10 - [DJC10_HUMAN]            | -0,032 | 0,85 | 0,017 | 0,015 |
| Q9NRW7-2 | Isoform 2 of Vacuolar protein sorting-associated protein 45 OS=Homo sapiens GN=VPS45 - [VPS45_HUMAN]  | -0,032 | 0,70 | 0,023 | 0,009 |
| P08575-2 | Isoform 2 of Receptor-type tyrosine-protein phosphatase C OS=Homo sapiens GN=PTPRC - [PTPRC_HUMAN]    | -0,031 | 0,68 | 0,008 | 0,023 |
| Q6P2Q9   | Pre-mRNA-processing-splicing factor 8 OS=Homo sapiens GN=PRPF8 PE=1 SV=2 - [PRP8_HUMAN]               | -0,031 | 0,81 | 0,020 | 0,011 |

|          |                                                                                                                                    |        |      |       |       |
|----------|------------------------------------------------------------------------------------------------------------------------------------|--------|------|-------|-------|
| P42566   | Epidermal growth factor receptor substrate 15 OS=Homo sapiens GN=EPS15 PE=1 SV=2 - [EPS15_HUMAN]                                   | -0,031 | 0,84 | 0,026 | 0,005 |
| Q9NZ32   | Actin-related protein 10 OS=Homo sapiens GN=ACTR10 PE=1 SV=1 - [ARP10_HUMAN]                                                       | -0,031 | 0,79 | 0,029 | 0,001 |
| P52655   | Transcription initiation factor IIA subunit 1 OS=Homo sapiens GN=GTF2A1 PE=1 SV=1 - [TF2AA_HUMAN]                                  | -0,031 | 0,76 | 0,026 | 0,004 |
| Q9ULC4-2 | Isoform 2 of Malignant T-cell-amplified sequence 1 OS=Homo sapiens GN=MCTS1 - [MCTS1_HUMAN]                                        | -0,031 | 0,86 | 0,026 | 0,004 |
| P02679-2 | Isoform Gamma-A of Fibrinogen gamma chain OS=Homo sapiens GN=FGG - [FIBG_HUMAN]                                                    | -0,030 | 0,68 | 0,016 | 0,014 |
| P02675   | Fibrinogen beta chain OS=Homo sapiens GN=FGB PE=1 SV=2 - [FIBB_HUMAN]                                                              | -0,030 | 0,69 | 0,020 | 0,010 |
| Q5JSH3-4 | Isoform 4 of WD repeat-containing protein 44 OS=Homo sapiens GN=WDR44 - [WDR44_HUMAN]                                              | -0,030 | 0,89 | 0,025 | 0,005 |
| Q10570   | Cleavage and polyadenylation specificity factor subunit 1 OS=Homo sapiens GN=CPSF1 PE=1 SV=2 - [CPSF1_HUMAN]                       | -0,030 | 0,86 | 0,023 | 0,007 |
| Q75N90   | Fibrillin-3 OS=Homo sapiens GN=FBN3 PE=2 SV=3 - [FBN3_HUMAN]                                                                       | -0,030 | 0,67 | 0,027 | 0,003 |
| Q14624-3 | Isoform 3 of Inter-alpha-trypsin inhibitor heavy chain H4 OS=Homo sapiens GN=ITIH4 - [ITIH4_HUMAN]                                 | -0,030 | 0,72 | 0,020 | 0,010 |
| P05155-2 | Isoform 2 of Plasma protease C1 inhibitor OS=Homo sapiens GN=SERPING1 - [IC1_HUMAN]                                                | -0,030 | 0,80 | 0,024 | 0,006 |
| Q14457   | Beclin-1 OS=Homo sapiens GN=BECN1 PE=1 SV=2 - [BECN1_HUMAN]                                                                        | -0,030 | 0,95 | 0,018 | 0,012 |
| P49327   | Fatty acid synthase OS=Homo sapiens GN=FASN PE=1 SV=3 - [FAS_HUMAN]                                                                | -0,030 | 0,83 | 0,028 | 0,002 |
| P27658   | Collagen alpha-1(VIII) chain OS=Homo sapiens GN=COL8A1 PE=1 SV=2 - [CO8A1_HUMAN]                                                   | -0,030 | 0,58 | 0,029 | 0,001 |
| P08603   | Complement factor H OS=Homo sapiens GN=CFH PE=1 SV=4 - [CFAH_HUMAN]                                                                | -0,030 | 0,75 | 0,018 | 0,012 |
| Q969Z0-2 | Isoform 2 of Protein TBRG4 OS=Homo sapiens GN=TBRG4 - [TBRG4_HUMAN]                                                                | -0,029 | 0,86 | 0,028 | 0,002 |
| Q12888   | Tumor suppressor p53-binding protein 1 OS=Homo sapiens GN=TP53BP1 PE=1 SV=2 - [TP53B_HUMAN]                                        | -0,029 | 0,85 | 0,029 | 0,001 |
| P02768   | Serum albumin OS=Homo sapiens GN=ALB PE=1 SV=2 - [ALBU_HUMAN]                                                                      | -0,029 | 0,76 | 0,028 | 0,001 |
| P67936-2 | Isoform 2 of Tropomyosin alpha-4 chain OS=Homo sapiens GN=TPM4 - [TPM4_HUMAN]                                                      | -0,029 | 0,78 | 0,028 | 0,001 |
| P02671-2 | Isoform 2 of Fibrinogen alpha chain OS=Homo sapiens GN=FGA - [FIBA_HUMAN]                                                          | -0,029 | 0,67 | 0,021 | 0,008 |
| Q9Y2X3   | Nucleolar protein 58 OS=Homo sapiens GN=NOP58 PE=1 SV=1 - [NOP58_HUMAN]                                                            | -0,029 | 0,73 | 0,026 | 0,003 |
| P02787   | Serotransferrin OS=Homo sapiens GN=TF PE=1 SV=3 - [TRFE_HUMAN]                                                                     | -0,028 | 0,82 | 0,027 | 0,002 |
| P36894   | Bone morphogenetic protein receptor type-1A OS=Homo sapiens GN=BMPRI1A PE=1 SV=2 - [BMR1A_HUMAN]                                   | -0,028 | 0,84 | 0,025 | 0,003 |
| Q08AG7   | Mitotic-spindle organizing protein 1 OS=Homo sapiens GN=MZT1 PE=1 SV=2 - [MZT1_HUMAN]                                              | -0,028 | 0,83 | 0,018 | 0,010 |
| P18428   | Lipopolysaccharide-binding protein OS=Homo sapiens GN=LBP PE=1 SV=3 - [LBP_HUMAN]                                                  | -0,028 | 0,68 | 0,020 | 0,008 |
| P54578   | Ubiquitin carboxyl-terminal hydrolase 14 OS=Homo sapiens GN=USP14 PE=1 SV=3 - [UBP14_HUMAN]                                        | -0,028 | 0,95 | 0,021 | 0,006 |
| Q8TAQ9-2 | Isoform 2 of SUN domain-containing protein 3 OS=Homo sapiens GN=SUN3 - [SUN3_HUMAN]                                                | -0,028 | 0,64 | 0,022 | 0,006 |
| P42704   | Leucine-rich PPR motif-containing protein, mitochondrial OS=Homo sapiens GN=LRPPRC PE=1 SV=3 - [LRPPRC_HUMAN]                      | -0,027 | 0,94 | 0,024 | 0,004 |
| O00232-2 | Isoform 2 of 26S proteasome non-ATPase regulatory subunit 12 OS=Homo sapiens GN=PSMD12 - [PSD12_HUMAN]                             | -0,027 | 0,83 | 0,025 | 0,002 |
| P46977-2 | Isoform 2 of Dolichyl-diphosphooligosaccharide--protein glycosyltransferase subunit STT3A OS=Homo sapiens GN=STT3A - [STT3A_HUMAN] | -0,027 | 0,90 | 0,025 | 0,002 |
| Q9BVJ6-2 | Isoform 2 of U3 small nucleolar RNA-associated protein 14 homolog A OS=Homo sapiens                                                | -0,027 | 0,86 | 0,024 | 0,003 |

| Protein accession number | Protein name                                                                                                | Loading value <sup>a</sup> | Fold change | jack-knife (JK) confidence interval <sup>b</sup> | ABS (Loading value)-ABS(JK) <sup>c</sup> |
|--------------------------|-------------------------------------------------------------------------------------------------------------|----------------------------|-------------|--------------------------------------------------|------------------------------------------|
|                          | GN=UTP14A - [UT14A_HUMAN]                                                                                   |                            |             |                                                  |                                          |
| Q92616                   | Translational activator GCN1 OS=Homo sapiens GN=GCN1L1 PE=1 SV=6 - [GCN1L_HUMAN]                            | -0,027                     | 0,94        | 0,023                                            | 0,003                                    |
| Q96T58                   | Msx2-interacting protein OS=Homo sapiens GN=SPEN PE=1 SV=1 - [MINT_HUMAN]                                   | -0,026                     | 0,93        | 0,018                                            | 0,009                                    |
| Q9NQE9                   | Histidine triad nucleotide-binding protein 3 OS=Homo sapiens GN=HINT3 PE=1 SV=1 - [HINT3_HUMAN]             | -0,026                     | 0,86        | 0,024                                            | 0,002                                    |
| P39900                   | Macrophage metalloelastase OS=Homo sapiens GN=MMP12 PE=1 SV=1 - [MMP12_HUMAN]                               | -0,026                     | 0,64        | 0,023                                            | 0,002                                    |
| Q16799                   | Reticulon-1 OS=Homo sapiens GN=RTN1 PE=1 SV=1 - [RTN1_HUMAN]                                                | -0,025                     | 0,77        | 0,024                                            | 0,001                                    |
| Q9NWW4                   | UPF0609 protein C4orf27 OS=Homo sapiens GN=C4orf27 PE=1 SV=2 - [CD027_HUMAN]                                | -0,025                     | 0,89        | 0,012                                            | 0,013                                    |
| P78527                   | DNA-dependent protein kinase catalytic subunit OS=Homo sapiens GN=PRKDC PE=1 SV=3 - [PRKDC_HUMAN]           | -0,025                     | 0,92        | 0,023                                            | 0,002                                    |
| Q8IX12-2                 | Isoform 2 of Cell division cycle and apoptosis regulator protein 1 OS=Homo sapiens GN=CCAR1 - [CCAR1_HUMAN] | -0,025                     | 0,84        | 0,017                                            | 0,007                                    |
| Q5XPI4                   | E3 ubiquitin-protein ligase RNF123 OS=Homo sapiens GN=RNF123 PE=1 SV=1 - [RNF123_HUMAN]                     | -0,023                     | 0,88        | 0,017                                            | 0,006                                    |
| P19971                   | Thymidine phosphorylase OS=Homo sapiens GN=TYMP PE=1 SV=2 - [TYPH_HUMAN]                                    | -0,022                     | 0,87        | 0,017                                            | 0,005                                    |
| P07358                   | Complement component C8 beta chain OS=Homo sapiens GN=C8B PE=1 SV=3 - [CO8B_HUMAN]                          | -0,022                     | 0,83        | 0,017                                            | 0,005                                    |

**Supplementary Table 4b.** Loadings and jack-knife (JK) confidence intervals for significant proteins in diluted samples, sorted according to loading value. OPLS-DA model is based on TAV and BAV being added as a Y variable. The significance was calculated as ABS (loading) – ABS (jack-knife confidence interval); the positive values indicated significantly expressed proteins.

| Proteins upregulated in BAV diluted samples |                                                                                                                                     |                            |             |                                                  |                                          |
|---------------------------------------------|-------------------------------------------------------------------------------------------------------------------------------------|----------------------------|-------------|--------------------------------------------------|------------------------------------------|
| Protein accession number                    | Protein name                                                                                                                        | Loading value <sup>a</sup> | Fold change | jack-knife (JK) confidence interval <sup>b</sup> | ABS (Loading value)-ABS(JK) <sup>c</sup> |
| O75525-2                                    | Isoform 2 of KH domain-containing, RNA-binding, signal transduction-associated protein 3 OS=Homo sapiens GN=KHDRB53 - [KHDR3_HUMAN] | 0,038                      | 1,95        | 0,017                                            | 0,021                                    |
| P56945-4                                    | Isoform 4 of Breast cancer anti-estrogen resistance protein 1 OS=Homo sapiens GN=BCAR1 - [BCAR1_HUMAN]                              | 0,038                      | 1,32        | 0,008                                            | 0,031                                    |
| Q92620                                      | Pre-mRNA-splicing factor ATP-dependent RNA helicase PRP16 OS=Homo sapiens GN=DHX38 PE=1 SV=2 - [PRP16_HUMAN]                        | 0,038                      | 1,35        | 0,025                                            | 0,013                                    |
| O60547-2                                    | Isoform 2 of GDP-mannose 4,6 dehydratase OS=Homo sapiens GN=GMDS - [GMDS_HUMAN]                                                     | 0,037                      | 1,65        | 0,012                                            | 0,025                                    |
| O14907                                      | Tax1-binding protein 3 OS=Homo sapiens GN=TAX1BP3 PE=1 SV=2 - [TX1B3_HUMAN]                                                         | 0,037                      | 1,16        | 0,022                                            | 0,015                                    |
| Q53HC5                                      | Kelch-like protein 26 OS=Homo sapiens GN=KLHL26 PE=1 SV=2 - [KLH26_HUMAN]                                                           | 0,037                      | 1,28        | 0,021                                            | 0,016                                    |
| Q9NQX7-2                                    | Isoform 2 of Integral membrane protein 2C OS=Homo sapiens GN=ITM2C - [ITM2C_HUMAN]                                                  | 0,037                      | 1,79        | 0,021                                            | 0,016                                    |
| O60637-3                                    | Isoform 3 of Tetraspanin-3 OS=Homo sapiens GN=TSPAN3 - [TSN3_HUMAN]                                                                 | 0,036                      | 1,55        | 0,018                                            | 0,019                                    |
| Q15785                                      | Mitochondrial import receptor subunit TOM34 OS=Homo sapiens GN=TOMM34 PE=1 SV=2 - [TOM34_HUMAN]                                     | 0,036                      | 1,55        | 0,016                                            | 0,020                                    |

|          |                                                                                                                |       |      |       |       |
|----------|----------------------------------------------------------------------------------------------------------------|-------|------|-------|-------|
| Q8TF09   | Dynein light chain roadblock-type 2 OS=Homo sapiens GN=DYNLRB2 PE=1 SV=1 - [DLRB2_HUMAN]                       | 0,036 | 1,47 | 0,018 | 0,018 |
| Q96HN2-3 | Isoform 3 of Adenosylhomocysteinase 3 OS=Homo sapiens GN=AHCYL2 - [SAHH3_HUMAN]                                | 0,036 | 1,39 | 0,028 | 0,008 |
| P78356   | Phosphatidylinositol 5-phosphate 4-kinase type-2 beta OS=Homo sapiens GN=PIP4K2B PE=1 SV=1 - [PI42B_HUMAN]     | 0,036 | 1,48 | 0,016 | 0,020 |
| Q8IVH8-3 | Isoform 3 of Mitogen-activated protein kinase kinase kinase 3 OS=Homo sapiens GN=MAP4K3 - [M4K3_HUMAN]         | 0,036 | 1,39 | 0,016 | 0,019 |
| Q9H7D0   | Dedicator of cytokinesis protein 5 OS=Homo sapiens GN=DOCK5 PE=1 SV=3 - [DOCK5_HUMAN]                          | 0,036 | 1,58 | 0,015 | 0,021 |
| Q08722-2 | Isoform OA3-293 of Leukocyte surface antigen CD47 OS=Homo sapiens GN=CD47 - [CD47_HUMAN]                       | 0,035 | 1,68 | 0,021 | 0,015 |
| P27986   | Phosphatidylinositol 3-kinase regulatory subunit alpha OS=Homo sapiens GN=PIK3R1 PE=1 SV=2 - [P85A_HUMAN]      | 0,035 | 1,35 | 0,026 | 0,010 |
| Q9BW83-2 | Isoform 2 of Intraflagellar transport protein 27 homolog OS=Homo sapiens GN=IFT27 - [IFT27_HUMAN]              | 0,035 | 1,59 | 0,014 | 0,021 |
| Q9Y5Z4   | Heme-binding protein 2 OS=Homo sapiens GN=HEBP2 PE=1 SV=1 - [HEBP2_HUMAN]                                      | 0,035 | 1,40 | 0,015 | 0,019 |
| O43739-2 | Isoform 2 of Cytohesin-3 OS=Homo sapiens GN=CYTH3 - [CYH3_HUMAN]                                               | 0,035 | 1,41 | 0,013 | 0,022 |
| P09211   | Glutathione S-transferase P OS=Homo sapiens GN=GSTP1 PE=1 SV=2 - [GSTP1_HUMAN]                                 | 0,035 | 1,26 | 0,008 | 0,026 |
| Q96RF0-2 | Isoform 2 of Sorting nexin-18 OS=Homo sapiens GN=SNX18 - [SNX18_HUMAN]                                         | 0,035 | 1,35 | 0,011 | 0,024 |
| Q8TF74-2 | Isoform 2 of WAS/WASL-interacting protein family member 2 OS=Homo sapiens GN=WIPF2 - [WIPF2_HUMAN]             | 0,035 | 1,29 | 0,026 | 0,009 |
| P08237-2 | Isoform 2 of ATP-dependent 6-phosphofructokinase, muscle type OS=Homo sapiens GN=PFKM - [PFKAM_HUMAN]          | 0,034 | 1,59 | 0,018 | 0,017 |
| O60279   | Sushi domain-containing protein 5 OS=Homo sapiens GN=SUSD5 PE=1 SV=3 - [SUSD5_HUMAN]                           | 0,034 | 1,88 | 0,011 | 0,023 |
| Q96P44-3 | Isoform 3 of Collagen alpha-1(XI) chain OS=Homo sapiens GN=COL21A1 - [COLA1_HUMAN]                             | 0,034 | 2,02 | 0,016 | 0,018 |
| P48745   | Protein NOV homolog OS=Homo sapiens GN=NOV PE=1 SV=1 - [NOV_HUMAN]                                             | 0,034 | 1,56 | 0,022 | 0,012 |
| P00441   | Superoxide dismutase [Cu-Zn] OS=Homo sapiens GN=SOD1 PE=1 SV=2 - [SODC_HUMAN]                                  | 0,034 | 1,37 | 0,016 | 0,018 |
| O75112-2 | Isoform 2 of LIM domain-binding protein 3 OS=Homo sapiens GN=LDB3 - [LDB3_HUMAN]                               | 0,034 | 2,19 | 0,012 | 0,022 |
| Q96CT7   | Coiled-coil domain-containing protein 124 OS=Homo sapiens GN=CCDC124 PE=1 SV=1 - [CC124_HUMAN]                 | 0,034 | 1,29 | 0,016 | 0,018 |
| Q9BSD7   | Cancer-related nucleoside-triphosphatase OS=Homo sapiens GN=NTPCR PE=1 SV=1 - [NTPCR_HUMAN]                    | 0,034 | 1,85 | 0,023 | 0,011 |
| P62979   | Ubiquitin-40S ribosomal protein S27a OS=Homo sapiens GN=RPS27A PE=1 SV=2 - [RS27A_HUMAN]                       | 0,034 | 1,30 | 0,023 | 0,011 |
| P07902   | Galactose-1-phosphate uridylyltransferase OS=Homo sapiens GN=GALT PE=1 SV=3 - [GALT_HUMAN]                     | 0,034 | 1,27 | 0,020 | 0,013 |
| O15357   | Phosphatidylinositol 3,4,5-trisphosphate 5-phosphatase 2 OS=Homo sapiens GN=INPPL1 PE=1 SV=2 - [SHIP2_HUMAN]   | 0,034 | 1,16 | 0,010 | 0,024 |
| O14964-2 | Isoform 2 of Hepatocyte growth factor-regulated tyrosine kinase substrate OS=Homo sapiens GN=HGS - [HGS_HUMAN] | 0,033 | 1,28 | 0,027 | 0,007 |
| O94760   | N(G),N(G)-dimethylarginine dimethylaminohydrolase 1 OS=Homo sapiens GN=DDAH1 PE=1 SV=3 - [DDAH1_HUMAN]         | 0,033 | 2,10 | 0,018 | 0,015 |
| Q9H0E2   | Toll-interacting protein OS=Homo sapiens GN=TOLLIP PE=1 SV=1 - [TOLIP_HUMAN]                                   | 0,033 | 1,31 | 0,024 | 0,009 |
| Q9C0D5-2 | Isoform 2 of Protein TANC1 OS=Homo sapiens GN=TANC1 - [TANC1_HUMAN]                                            | 0,033 | 1,32 | 0,021 | 0,013 |
| O15231-5 | Isoform 5 of Zinc finger protein 185 OS=Homo sapiens GN=ZNF185 - [ZN185_HUMAN]                                 | 0,033 | 2,02 | 0,017 | 0,017 |
| Q9NSK0   | Kinesin light chain 4 OS=Homo sapiens GN=KLC4 PE=1 SV=3 - [KLC4_HUMAN]                                         | 0,033 | 1,18 | 0,020 | 0,013 |
| O95562   | Vesicle transport protein SFT2B OS=Homo sapiens GN=SFT2D2 PE=1 SV=1 - [SFT2B_HUMAN]                            | 0,033 | 1,29 | 0,020 | 0,013 |

|          |                                                                                                                        |       |      |       |       |
|----------|------------------------------------------------------------------------------------------------------------------------|-------|------|-------|-------|
| O75718   | Cartilage-associated protein OS=Homo sapiens GN=CRTAP PE=1 SV=1 - [CRTAP_HUMAN]                                        | 0,033 | 2,00 | 0,017 | 0,016 |
| Q9NZN5-2 | Isoform 2 of Rho guanine nucleotide exchange factor 12 OS=Homo sapiens GN=ARHGEF12 - [ARHGC_HUMAN]                     | 0,033 | 1,35 | 0,021 | 0,012 |
| Q9NRF8   | CTP synthase 2 OS=Homo sapiens GN=CTPS2 PE=1 SV=1 - [PYRG2_HUMAN]                                                      | 0,033 | 1,91 | 0,018 | 0,015 |
| Q14974   | Importin subunit beta-1 OS=Homo sapiens GN=KPNB1 PE=1 SV=2 - [IMB1_HUMAN]                                              | 0,033 | 1,72 | 0,023 | 0,009 |
| P50579   | Methionine aminopeptidase 2 OS=Homo sapiens GN=METAP2 PE=1 SV=1 - [MAP2_HUMAN]                                         | 0,033 | 1,16 | 0,020 | 0,012 |
| Q9NZZ3   | Charged multivesicular body protein 5 OS=Homo sapiens GN=CHMP5 PE=1 SV=1 - [CHMP5_HUMAN]                               | 0,033 | 1,17 | 0,019 | 0,014 |
| Q99439   | Calponin-2 OS=Homo sapiens GN=CNN2 PE=1 SV=4 - [CNN2_HUMAN]                                                            | 0,033 | 1,40 | 0,024 | 0,008 |
| Q9UKG1   | DCC-interacting protein 13-alpha OS=Homo sapiens GN=APPL1 PE=1 SV=1 - [DP13A_HUMAN]                                    | 0,033 | 1,24 | 0,016 | 0,017 |
| Q14393-3 | Isoform 3 of Growth arrest-specific protein 6 OS=Homo sapiens GN=GAS6 - [GAS6_HUMAN]                                   | 0,033 | 1,44 | 0,022 | 0,010 |
| P33527-8 | Isoform 8 of Multidrug resistance-associated protein 1 OS=Homo sapiens GN=ABCC1 - [MRP1_HUMAN]                         | 0,032 | 1,53 | 0,021 | 0,012 |
| Q06830   | Peroxiredoxin-1 OS=Homo sapiens GN=PRDX1 PE=1 SV=1 - [PRDX1_HUMAN]                                                     | 0,032 | 1,22 | 0,024 | 0,009 |
| Q99747-2 | Isoform 2 of Gamma-soluble NSF attachment protein OS=Homo sapiens GN=NAPG - [SNAG_HUMAN]                               | 0,032 | 1,28 | 0,014 | 0,018 |
| Q99518   | Dimethylaniline monooxygenase [N-oxide-forming] 2 OS=Homo sapiens GN=FMO2 PE=1 SV=4 - [FMO2_HUMAN]                     | 0,032 | 1,38 | 0,015 | 0,017 |
| P09417   | Dihydropteridine reductase OS=Homo sapiens GN=QDPR PE=1 SV=2 - [DHPR_HUMAN]                                            | 0,032 | 1,33 | 0,021 | 0,011 |
| P15374   | Ubiquitin carboxyl-terminal hydrolase isozyme L3 OS=Homo sapiens GN=UCHL3 PE=1 SV=1 - [UCHL3_HUMAN]                    | 0,032 | 1,12 | 0,026 | 0,006 |
| P35249-2 | Isoform 2 of Replication factor C subunit 4 OS=Homo sapiens GN=RFC4 - [RFC4_HUMAN]                                     | 0,032 | 1,27 | 0,022 | 0,010 |
| P05067-7 | Isoform L-APP733 of Amyloid beta A4 protein OS=Homo sapiens GN=APP - [A4_HUMAN]                                        | 0,032 | 2,06 | 0,025 | 0,007 |
| Q96T58   | Msx2-interacting protein OS=Homo sapiens GN=SPEN PE=1 SV=1 - [MINT_HUMAN]                                              | 0,032 | 1,21 | 0,026 | 0,006 |
| Q9H653   | Epidermal growth factor receptor kinase substrate 8-like protein 2 OS=Homo sapiens GN=EPS8L2 PE=1 SV=2 - [ES8L2_HUMAN] | 0,032 | 1,21 | 0,015 | 0,016 |
| O95295   | SNARE-associated protein Snapin OS=Homo sapiens GN=SNAPIN PE=1 SV=1 - [SNAPN_HUMAN]                                    | 0,032 | 1,27 | 0,021 | 0,010 |
| P17812-2 | Isoform 2 of CTP synthase 1 OS=Homo sapiens GN=CTPS1 - [PYRG1_HUMAN]                                                   | 0,032 | 1,33 | 0,005 | 0,026 |
| Q14011   | Cold-inducible RNA-binding protein OS=Homo sapiens GN=CIRBP PE=1 SV=1 - [CIRBP_HUMAN]                                  | 0,032 | 1,96 | 0,018 | 0,013 |
| Q14156-3 | Isoform 3 of Protein EFR3 homolog A OS=Homo sapiens GN=EFR3A - [EFR3A_HUMAN]                                           | 0,032 | 1,22 | 0,009 | 0,022 |
| Q14204   | Cytoplasmic dynein 1 heavy chain 1 OS=Homo sapiens GN=DYNC1H1 PE=1 SV=5 - [DYHC1_HUMAN]                                | 0,032 | 1,15 | 0,011 | 0,020 |
| Q9P0K7-4 | Isoform 4 of Ankyrin OS=Homo sapiens GN=RAI14 - [RAI14_HUMAN]                                                          | 0,032 | 1,23 | 0,018 | 0,014 |
| Q9UKX5   | Integrin alpha-11 OS=Homo sapiens GN=ITGA11 PE=1 SV=2 - [ITA11_HUMAN]                                                  | 0,032 | 1,37 | 0,016 | 0,016 |
| P25325   | 3-mercaptopyruvate sulfurtransferase OS=Homo sapiens GN=MPST PE=1 SV=3 - [THTM_HUMAN]                                  | 0,031 | 2,02 | 0,026 | 0,006 |
| Q13126-7 | Isoform 7 of S-methyl-5'-thioadenosine phosphorylase OS=Homo sapiens GN=MTAP - [MTAP_HUMAN]                            | 0,031 | 1,65 | 0,015 | 0,016 |
| Q8WUP2   | Filamin-binding LIM protein 1 OS=Homo sapiens GN=FBLIM1 PE=1 SV=2 - [FBL1_HUMAN]                                       | 0,031 | 1,36 | 0,015 | 0,017 |
| O15061   | Synemin OS=Homo sapiens GN=SYNM PE=1 SV=2 - [SYNM_HUMAN]                                                               | 0,031 | 1,29 | 0,013 | 0,018 |
| P10644-2 | Isoform 2 of cAMP-dependent protein kinase type I-alpha regulatory subunit OS=Homo sapiens GN=PRKAR1A - [KAPO_HUMAN]   | 0,031 | 1,29 | 0,013 | 0,018 |
| Q13683-9 | Isoform Alpha-7X2DB of Integrin alpha-7 OS=Homo sapiens GN=ITGA7 - [ITA7_HUMAN]                                        | 0,031 | 1,62 | 0,020 | 0,011 |
| P35080-2 | Isoform IIb of Profilin-2 OS=Homo sapiens GN=PFN2 - [PROF2_HUMAN]                                                      | 0,031 | 1,26 | 0,009 | 0,022 |

|          |                                                                                                                                       |       |      |       |       |
|----------|---------------------------------------------------------------------------------------------------------------------------------------|-------|------|-------|-------|
| O94875-2 | Isoform 2 of Sorbin and SH3 domain-containing protein 2 OS=Homo sapiens GN=SORBS2 - [SRBS2_HUMAN]                                     | 0,031 | 1,38 | 0,025 | 0,006 |
| Q6EMK4   | Vasorin OS=Homo sapiens GN=VASN PE=1 SV=1 - [VASN_HUMAN]                                                                              | 0,031 | 1,46 | 0,016 | 0,015 |
| Q9NRR1   | Cytokine-like protein 1 OS=Homo sapiens GN=CYTL1 PE=1 SV=1 - [CYTL1_HUMAN]                                                            | 0,031 | 3,03 | 0,029 | 0,002 |
| Q96N67-4 | Isoform 4 of Dedicator of cytokinesis protein 7 OS=Homo sapiens GN=DOCK7 - [DOCK7_HUMAN]                                              | 0,031 | 1,15 | 0,022 | 0,009 |
| P09525   | Annexin A4 OS=Homo sapiens GN=ANXA4 PE=1 SV=4 - [ANXA4_HUMAN]                                                                         | 0,031 | 1,18 | 0,023 | 0,008 |
| Q9H330-3 | Isoform 3 of Transmembrane protein 245 OS=Homo sapiens GN=TMEM245 - [TM245_HUMAN]                                                     | 0,031 | 1,41 | 0,015 | 0,016 |
| Q6PCE3   | Glucose 1,6-bisphosphate synthase OS=Homo sapiens GN=PGM2L1 PE=1 SV=3 - [PGM2L_HUMAN]                                                 | 0,031 | 1,51 | 0,019 | 0,012 |
| P63151   | Serine/threonine-protein phosphatase 2A 55 kDa regulatory subunit B alpha isoform OS=Homo sapiens GN=PPP2R2A PE=1 SV=1 - [2ABA_HUMAN] | 0,031 | 1,58 | 0,024 | 0,007 |
| O14576-4 | Isoform 4 of Cytoplasmic dynein 1 intermediate chain 1 OS=Homo sapiens GN=DYNC1I1 - [DC1I1_HUMAN]                                     | 0,031 | 1,55 | 0,012 | 0,018 |
| P53582   | Methionine aminopeptidase 1 OS=Homo sapiens GN=METAP1 PE=1 SV=2 - [MAP11_HUMAN]                                                       | 0,031 | 1,24 | 0,023 | 0,008 |
| P14649   | Myosin light chain 6B OS=Homo sapiens GN=MYL6B PE=1 SV=1 - [MYL6B_HUMAN]                                                              | 0,031 | 1,33 | 0,011 | 0,020 |
| P46937-5 | Isoform 5 of Transcriptional coactivator YAP1 OS=Homo sapiens GN=YAP1 - [YAP1_HUMAN]                                                  | 0,030 | 1,41 | 0,016 | 0,014 |
| P35580   | Myosin-10 OS=Homo sapiens GN=MYH10 PE=1 SV=3 - [MYH10_HUMAN]                                                                          | 0,030 | 1,40 | 0,008 | 0,023 |
| Q9HB71   | Calcyclin-binding protein OS=Homo sapiens GN=CACYBP PE=1 SV=2 - [CYBP_HUMAN]                                                          | 0,030 | 1,07 | 0,015 | 0,015 |
| Q8TDB4   | Protein MGARP OS=Homo sapiens GN=MGARP PE=1 SV=1 - [HUMMR_HUMAN]                                                                      | 0,030 | 1,75 | 0,022 | 0,009 |
| Q13393-4 | Isoform PLD1D of Phospholipase D1 OS=Homo sapiens GN=PLD1 - [PLD1_HUMAN]                                                              | 0,030 | 1,22 | 0,012 | 0,018 |
| P11362-6 | Isoform 12 of Fibroblast growth factor receptor 1 OS=Homo sapiens GN=FGFR1 - [FGFR1_HUMAN]                                            | 0,030 | 1,26 | 0,012 | 0,018 |
| P50995-2 | Isoform 2 of Annexin A11 OS=Homo sapiens GN=ANXA11 - [ANX11_HUMAN]                                                                    | 0,030 | 1,26 | 0,013 | 0,017 |
| P15559-3 | Isoform 3 of NAD(P)H dehydrogenase [quinone] 1 OS=Homo sapiens GN=NQO1 - [NQO1_HUMAN]                                                 | 0,030 | 2,96 | 0,019 | 0,011 |
| P53041   | Serine/threonine-protein phosphatase 5 OS=Homo sapiens GN=PPP5C PE=1 SV=1 - [PPP5_HUMAN]                                              | 0,030 | 1,23 | 0,012 | 0,019 |
| P06756-3 | Isoform 3 of Integrin alpha-V OS=Homo sapiens GN=ITGAV - [ITAV_HUMAN]                                                                 | 0,030 | 1,31 | 0,011 | 0,020 |
| P52943   | Cysteine-rich protein 2 OS=Homo sapiens GN=CRIP2 PE=1 SV=1 - [CRIP2_HUMAN]                                                            | 0,030 | 1,36 | 0,021 | 0,009 |
| P20338   | Ras-related protein Rab-4A OS=Homo sapiens GN=RAB4A PE=1 SV=3 - [RAB4A_HUMAN]                                                         | 0,030 | 1,26 | 0,014 | 0,016 |
| P08758   | Annexin A5 OS=Homo sapiens GN=ANXA5 PE=1 SV=2 - [ANXA5_HUMAN]                                                                         | 0,030 | 1,19 | 0,021 | 0,009 |
| Q5XXA6-3 | Isoform 3 of Anoctamin-1 OS=Homo sapiens GN=ANO1 - [ANO1_HUMAN]                                                                       | 0,030 | 1,70 | 0,011 | 0,019 |
| P28074-3 | Isoform 3 of Proteasome subunit beta type-5 OS=Homo sapiens GN=PSMB5 - [PSB5_HUMAN]                                                   | 0,030 | 1,42 | 0,015 | 0,015 |
| Q16643   | Drebrin OS=Homo sapiens GN=DBN1 PE=1 SV=4 - [DREB_HUMAN]                                                                              | 0,030 | 1,28 | 0,018 | 0,012 |
| P06396-2 | Isoform 2 of Gelsolin OS=Homo sapiens GN=GSN - [GELS_HUMAN]                                                                           | 0,030 | 1,26 | 0,016 | 0,014 |
| Q9H098   | Protein FAM107B OS=Homo sapiens GN=FAM107B PE=1 SV=1 - [F107B_HUMAN]                                                                  | 0,030 | 1,45 | 0,021 | 0,009 |
| O00244   | Copper transport protein ATOX1 OS=Homo sapiens GN=ATOX1 PE=1 SV=1 - [ATOX1_HUMAN]                                                     | 0,030 | 1,18 | 0,017 | 0,013 |
| P17174   | Aspartate aminotransferase, cytoplasmic OS=Homo sapiens GN=GOT1 PE=1 SV=3 - [AATC_HUMAN]                                              | 0,030 | 1,12 | 0,018 | 0,012 |
| Q96N55   | Ankyrin repeat and SOCS box protein 16 OS=Homo sapiens GN=ASB16 PE=1 SV=2 - [ASB16_HUMAN]                                             | 0,030 | 2,02 | 0,025 | 0,005 |
| Q9P2B2   | Prostaglandin F2 receptor negative regulator OS=Homo sapiens GN=PTGFRN PE=1 SV=2 - [FPRP_HUMAN]                                       | 0,030 | 1,41 | 0,026 | 0,004 |
| P04083   | Annexin A1 OS=Homo sapiens GN=ANXA1 PE=1 SV=2 - [ANXA1_HUMAN]                                                                         | 0,030 | 1,19 | 0,014 | 0,016 |
| P62879   | Guanine nucleotide-binding protein G(i)/G(s)/G(t) subunit beta-2 OS=Homo sapiens GN=GNB2 PE=1                                         | 0,030 | 1,20 | 0,023 | 0,007 |

|          |                                                                                                                |       |      |       |       |
|----------|----------------------------------------------------------------------------------------------------------------|-------|------|-------|-------|
|          | SV=3 - [GBB2_HUMAN]                                                                                            |       |      |       |       |
| P12931   | Proto-oncogene tyrosine-protein kinase Src OS=Homo sapiens GN=SRC PE=1 SV=3 - [SRC_HUMAN]                      | 0,030 | 1,25 | 0,024 | 0,006 |
| Q15111   | Inactive phospholipase C-like protein 1 OS=Homo sapiens GN=PLCL1 PE=1 SV=3 - [PLCL1_HUMAN]                     | 0,030 | 1,42 | 0,010 | 0,020 |
| P30086   | Phosphatidylethanolamine-binding protein 1 OS=Homo sapiens GN=PEBP1 PE=1 SV=3 - [PEBP1_HUMAN]                  | 0,030 | 1,34 | 0,019 | 0,011 |
| Q08380   | Galectin-3-binding protein OS=Homo sapiens GN=LGALS3BP PE=1 SV=1 - [LG3BP_HUMAN]                               | 0,030 | 1,92 | 0,024 | 0,006 |
| Q92934   | Bcl2-associated agonist of cell death OS=Homo sapiens GN=BAD PE=1 SV=3 - [BAD_HUMAN]                           | 0,029 | 1,16 | 0,014 | 0,016 |
| Q9Y4G8   | Rap guanine nucleotide exchange factor 2 OS=Homo sapiens GN=RAPGEF2 PE=1 SV=1 - [RPGF2_HUMAN]                  | 0,029 | 1,29 | 0,014 | 0,016 |
| Q9UBQ0   | Vacuolar protein sorting-associated protein 29 OS=Homo sapiens GN=VPS29 PE=1 SV=1 - [VPS29_HUMAN]              | 0,029 | 1,29 | 0,021 | 0,009 |
| Q01995   | Transgelin OS=Homo sapiens GN=TAGLN PE=1 SV=4 - [TAGL_HUMAN]                                                   | 0,029 | 1,37 | 0,015 | 0,015 |
| Q96HC4   | PDZ and LIM domain protein 5 OS=Homo sapiens GN=PDLIM5 PE=1 SV=5 - [PDLI5_HUMAN]                               | 0,029 | 1,16 | 0,013 | 0,016 |
| Q14247   | Src substrate cortactin OS=Homo sapiens GN=CTTN PE=1 SV=2 - [SRC8_HUMAN]                                       | 0,029 | 1,31 | 0,013 | 0,017 |
| P50502   | Hsc70-interacting protein OS=Homo sapiens GN=ST13 PE=1 SV=2 - [F10A1_HUMAN]                                    | 0,029 | 1,18 | 0,015 | 0,015 |
| P57087-2 | Isoform 2 of Junctional adhesion molecule B OS=Homo sapiens GN=JAM2 - [JAM2_HUMAN]                             | 0,029 | 1,57 | 0,014 | 0,015 |
| Q8WZA0   | Protein LZIC OS=Homo sapiens GN=LZIC PE=1 SV=1 - [LZIC_HUMAN]                                                  | 0,029 | 1,15 | 0,023 | 0,006 |
| Q14678-2 | Isoform 2 of KN motif and ankyrin repeat domain-containing protein 1 OS=Homo sapiens GN=KANK1 - [KANK1_HUMAN]  | 0,029 | 1,56 | 0,013 | 0,016 |
| P0CAP2-3 | Isoform 3 of DNA-directed RNA polymerase II subunit GRINL1A OS=Homo sapiens GN=POLR2M - [GRL1A_HUMAN]          | 0,029 | 1,22 | 0,013 | 0,016 |
| Q92734-4 | Isoform 4 of Protein TFG OS=Homo sapiens GN=TFG - [TFG_HUMAN]                                                  | 0,029 | 1,26 | 0,014 | 0,014 |
| Q12979-4 | Isoform 4 of Active breakpoint cluster region-related protein OS=Homo sapiens GN=ABR - [ABR_HUMAN]             | 0,029 | 1,27 | 0,018 | 0,011 |
| Q9NPC6   | Myozenin-2 OS=Homo sapiens GN=MYOZ2 PE=1 SV=1 - [MYOZ2_HUMAN]                                                  | 0,029 | 1,73 | 0,022 | 0,007 |
| Q4G0F5   | Vacuolar protein sorting-associated protein 26B OS=Homo sapiens GN=VPS26B PE=1 SV=2 - [VP26B_HUMAN]            | 0,029 | 1,25 | 0,012 | 0,017 |
| P50416-2 | Isoform 2 of Carnitine O-palmitoyltransferase 1, liver isoform OS=Homo sapiens GN=CPT1A - [CPT1A_HUMAN]        | 0,029 | 1,30 | 0,019 | 0,010 |
| Q06124-2 | Isoform 2 of Tyrosine-protein phosphatase non-receptor type 11 OS=Homo sapiens GN=PTPN11 - [PTN11_HUMAN]       | 0,029 | 1,28 | 0,010 | 0,018 |
| Q99426-2 | Isoform 2 of Tubulin-folding cofactor B OS=Homo sapiens GN=TBCB - [TBCB_HUMAN]                                 | 0,029 | 1,26 | 0,014 | 0,014 |
| O95071-2 | Isoform 2 of E3 ubiquitin-protein ligase UBR5 OS=Homo sapiens GN=UBR5 - [UBR5_HUMAN]                           | 0,029 | 1,17 | 0,018 | 0,011 |
| Q07092-2 | Isoform 2 of Collagen alpha-1(XVI) chain OS=Homo sapiens GN=COL16A1 - [COGA1_HUMAN]                            | 0,029 | 1,89 | 0,020 | 0,009 |
| P29558-2 | Isoform 2 of RNA-binding motif, single-stranded-interacting protein 1 OS=Homo sapiens GN=RBMS1 - [RBMS1_HUMAN] | 0,029 | 1,15 | 0,016 | 0,013 |
| Q9NZU5   | LIM and cysteine-rich domains protein 1 OS=Homo sapiens GN=LMCD1 PE=1 SV=1 - [LMCD1_HUMAN]                     | 0,029 | 1,40 | 0,010 | 0,018 |
| O95757   | Heat shock 70 kDa protein 4L OS=Homo sapiens GN=HSPA4L PE=1 SV=3 - [HS74L_HUMAN]                               | 0,029 | 1,30 | 0,009 | 0,019 |
| P26447   | Protein S100-A4 OS=Homo sapiens GN=S100A4 PE=1 SV=1 - [S10A4_HUMAN]                                            | 0,029 | 1,28 | 0,023 | 0,006 |
| Q9UBX5   | Fibulin-5 OS=Homo sapiens GN=FBLN5 PE=1 SV=1 - [FBLN5_HUMAN]                                                   | 0,029 | 1,47 | 0,011 | 0,017 |
| Q16881-5 | Isoform 5 of Thioredoxin reductase 1, cytoplasmic OS=Homo sapiens GN=TXNRD1 - [TRXR1_HUMAN]                    | 0,029 | 1,26 | 0,012 | 0,017 |

|           |                                                                                                                 |       |      |       |       |
|-----------|-----------------------------------------------------------------------------------------------------------------|-------|------|-------|-------|
| Q9UBQ7    | Glyoxylate reductase/hydroxypyruvate reductase OS=Homo sapiens GN=GRHPR PE=1 SV=1 - [GRHPR_HUMAN]               | 0,029 | 1,44 | 0,013 | 0,016 |
| O00159-2  | Isoform 2 of Unconventional myosin-Ic OS=Homo sapiens GN=MYO1C - [MYO1C_HUMAN]                                  | 0,029 | 1,35 | 0,014 | 0,015 |
| Q9NR12-2  | Isoform 2 of PDZ and LIM domain protein 7 OS=Homo sapiens GN=PDLIM7 - [PDLI7_HUMAN]                             | 0,028 | 1,34 | 0,009 | 0,020 |
| Q6ZVM7    | TOM1-like protein 2 OS=Homo sapiens GN=TOM1L2 PE=1 SV=1 - [TM1L2_HUMAN]                                         | 0,028 | 1,31 | 0,027 | 0,002 |
| P10915    | Hyaluronan and proteoglycan link protein 1 OS=Homo sapiens GN=HAPLN1 PE=2 SV=2 - [HPLN1_HUMAN]                  | 0,028 | 2,46 | 0,021 | 0,007 |
| Q8NF91-4  | Isoform 4 of Nesprin-1 OS=Homo sapiens GN=SYNE1 - [SYNE1_HUMAN]                                                 | 0,028 | 1,27 | 0,017 | 0,011 |
| Q9NRA8-2  | Isoform 2 of Eukaryotic translation initiation factor 4E transporter OS=Homo sapiens GN=EIF4ENIF1 - [4ET_HUMAN] | 0,028 | 1,25 | 0,019 | 0,010 |
| Q06828    | Fibromodulin OS=Homo sapiens GN=FMOD PE=1 SV=2 - [FMOD_HUMAN]                                                   | 0,028 | 1,49 | 0,020 | 0,009 |
| O60814    | Histone H2B type 1-K OS=Homo sapiens GN=HIST1H2BK PE=1 SV=3 - [H2B1K_HUMAN]                                     | 0,028 | 1,24 | 0,025 | 0,003 |
| Q9H7C9-3  | Isoform 3 of Mth938 domain-containing protein OS=Homo sapiens GN=AAMDC - [AAMDC_HUMAN]                          | 0,028 | 1,51 | 0,027 | 0,002 |
| P42330    | Aldo-keto reductase family 1 member C3 OS=Homo sapiens GN=AKR1C3 PE=1 SV=4 - [AK1C3_HUMAN]                      | 0,028 | 1,40 | 0,012 | 0,016 |
| Q6UVK1    | Chondroitin sulfate proteoglycan 4 OS=Homo sapiens GN=CSPG4 PE=1 SV=2 - [CSPG4_HUMAN]                           | 0,028 | 1,26 | 0,021 | 0,008 |
| Q969P0-3  | Isoform 3 of Immunoglobulin superfamily member 8 OS=Homo sapiens GN=IGSF8 - [IGSF8_HUMAN]                       | 0,028 | 1,38 | 0,016 | 0,012 |
| O75751    | Solute carrier family 22 member 3 OS=Homo sapiens GN=SLC22A3 PE=1 SV=1 - [S22A3_HUMAN]                          | 0,028 | 2,07 | 0,020 | 0,008 |
| Q9BXF6    | Rab11 family-interacting protein 5 OS=Homo sapiens GN=RAB11FIP5 PE=1 SV=1 - [RFIP5_HUMAN]                       | 0,028 | 1,28 | 0,020 | 0,008 |
| Q16832    | Discoidin domain-containing receptor 2 OS=Homo sapiens GN=DDR2 PE=1 SV=2 - [DDR2_HUMAN]                         | 0,028 | 1,26 | 0,022 | 0,006 |
| Q9UPQ0-10 | Isoform 10 of LIM and calponin homology domains-containing protein 1 OS=Homo sapiens GN=LIMCH1 - [LIMC1_HUMAN]  | 0,028 | 1,31 | 0,015 | 0,013 |
| Q8NBF2    | NHL repeat-containing protein 2 OS=Homo sapiens GN=NHLRC2 PE=1 SV=1 - [NHLC2_HUMAN]                             | 0,028 | 1,15 | 0,021 | 0,007 |
| P02461    | Collagen alpha-1(III) chain OS=Homo sapiens GN=COL3A1 PE=1 SV=4 - [CO3A1_HUMAN]                                 | 0,028 | 1,48 | 0,024 | 0,004 |
| O75110-2  | Isoform Short of Probable phospholipid-transporting ATPase IIA OS=Homo sapiens GN=ATP9A - [ATP9A_HUMAN]         | 0,028 | 1,35 | 0,017 | 0,011 |
| Q9BUP0    | EF-hand domain-containing protein D1 OS=Homo sapiens GN=EFHD1 PE=1 SV=1 - [EFHD1_HUMAN]                         | 0,028 | 1,39 | 0,019 | 0,009 |
| O95834    | Echinoderm microtubule-associated protein-like 2 OS=Homo sapiens GN=EML2 PE=1 SV=1 - [EMAL2_HUMAN]              | 0,028 | 1,31 | 0,011 | 0,016 |
| Q9H6U6-6  | Isoform 6 of Breast carcinoma-amplified sequence 3 OS=Homo sapiens GN=BCAS3 - [BCAS3_HUMAN]                     | 0,028 | 1,22 | 0,017 | 0,011 |
| P11142    | Heat shock cognate 71 kDa protein OS=Homo sapiens GN=HSPA8 PE=1 SV=1 - [HSP7C_HUMAN]                            | 0,028 | 1,07 | 0,011 | 0,017 |
| P08174-4  | Isoform 4 of Complement decay-accelerating factor OS=Homo sapiens GN=CD55 - [DAF_HUMAN]                         | 0,028 | 1,34 | 0,013 | 0,014 |
| P34096    | Ribonuclease 4 OS=Homo sapiens GN=RNASE4 PE=1 SV=3 - [RNAS4_HUMAN]                                              | 0,028 | 1,45 | 0,017 | 0,010 |
| Q8IWX3    | Ankyrin repeat and KH domain-containing protein 1 OS=Homo sapiens GN=ANKHD1 PE=1 SV=1 - [ANKH1_HUMAN]           | 0,028 | 1,23 | 0,026 | 0,001 |
| Q13563-5  | Isoform 5 of Polycystin-2 OS=Homo sapiens GN=PKD2 - [PKD2_HUMAN]                                                | 0,028 | 1,28 | 0,012 | 0,016 |
| Q9NVE7    | Pantothenate kinase 4 OS=Homo sapiens GN=PANK4 PE=1 SV=1 - [PANK4_HUMAN]                                        | 0,028 | 1,23 | 0,019 | 0,009 |
| Q13439-3  | Isoform 3 of Golgin subfamily A member 4 OS=Homo sapiens GN=GOLGA4 - [GOGA4_HUMAN]                              | 0,028 | 1,19 | 0,019 | 0,009 |
| Q7Z304    | MAM domain-containing protein 2 OS=Homo sapiens GN=MAMDC2 PE=2 SV=3 - [MAMC2_HUMAN]                             | 0,028 | 1,55 | 0,025 | 0,003 |
| P09936    | Ubiquitin carboxyl-terminal hydrolase isozyme L1 OS=Homo sapiens GN=UCHL1 PE=1 SV=2 -                           | 0,028 | 1,56 | 0,016 | 0,011 |



|          | [UCHL1_HUMAN]                                                                                                |       |      |       |       |  |  |
|----------|--------------------------------------------------------------------------------------------------------------|-------|------|-------|-------|--|--|
| P07311   | Acylphosphatase-1 OS=Homo sapiens GN=ACYP1 PE=1 SV=2 - [ACYP1_HUMAN]                                         | 0,028 | 1,34 | 0,013 | 0,015 |  |  |
| P53602   | Diphosphomevalonate decarboxylase OS=Homo sapiens GN=MVD PE=1 SV=1 - [MVD1_HUMAN]                            | 0,028 | 1,16 | 0,025 | 0,003 |  |  |
| Q96RW7-2 | Isoform 2 of Hemicentin-1 OS=Homo sapiens GN=HMCN1 - [HMCN1_HUMAN]                                           | 0,027 | 1,43 | 0,023 | 0,005 |  |  |
| P40222   | Alpha-taxilin OS=Homo sapiens GN=TXLNA PE=1 SV=3 - [TXLNA_HUMAN]                                             | 0,027 | 1,10 | 0,019 | 0,008 |  |  |
| Q12765   | Secernin-1 OS=Homo sapiens GN=SCRN1 PE=1 SV=2 - [SCRN1_HUMAN]                                                | 0,027 | 1,15 | 0,017 | 0,010 |  |  |
| Q13620-3 | Isoform 3 of Cullin-4B OS=Homo sapiens GN=CUL4B - [CUL4B_HUMAN]                                              | 0,027 | 1,20 | 0,020 | 0,008 |  |  |
| P45974-2 | Isoform Short of Ubiquitin carboxyl-terminal hydrolase 5 OS=Homo sapiens GN=USP5 - [UBP5_HUMAN]              | 0,027 | 1,13 | 0,017 | 0,011 |  |  |
| O43707   | Alpha-actinin-4 OS=Homo sapiens GN=ACTN4 PE=1 SV=2 - [ACTN4_HUMAN]                                           | 0,027 | 1,19 | 0,016 | 0,011 |  |  |
| Q07954   | Prolow-density lipoprotein receptor-related protein 1 OS=Homo sapiens GN=LRP1 PE=1 SV=2 - [LRP1_HUMAN]       | 0,027 | 1,18 | 0,024 | 0,003 |  |  |
| P07737   | Profilin-1 OS=Homo sapiens GN=PFN1 PE=1 SV=2 - [PROF1_HUMAN]                                                 | 0,027 | 1,09 | 0,019 | 0,008 |  |  |
| P61020   | Ras-related protein Rab-5B OS=Homo sapiens GN=RAB5B PE=1 SV=1 - [RAB5B_HUMAN]                                | 0,027 | 1,22 | 0,022 | 0,005 |  |  |
| Q9Y2B9   | cAMP-dependent protein kinase inhibitor gamma OS=Homo sapiens GN=PKIG PE=2 SV=1 - [IPKG_HUMAN]               | 0,027 | 1,35 | 0,024 | 0,003 |  |  |
| P19105   | Myosin regulatory light chain 12A OS=Homo sapiens GN=MYL12A PE=1 SV=2 - [ML12A_HUMAN]                        | 0,027 | 1,23 | 0,013 | 0,014 |  |  |
| Q9NRX5   | Serine incorporator 1 OS=Homo sapiens GN=SERINC1 PE=1 SV=1 - [SERC1_HUMAN]                                   | 0,027 | 1,21 | 0,016 | 0,011 |  |  |
| P16112-3 | Isoform 3 of Aggrecan core protein OS=Homo sapiens GN=ACAN - [PGCA_HUMAN]                                    | 0,027 | 1,75 | 0,023 | 0,004 |  |  |
| Q32MZ4-4 | Isoform 4 of Leucine-rich repeat flightless-interacting protein 1 OS=Homo sapiens GN=LRRFIP1 - [LRRF1_HUMAN] | 0,027 | 1,23 | 0,013 | 0,014 |  |  |
| O75116   | Rho-associated protein kinase 2 OS=Homo sapiens GN=ROCK2 PE=1 SV=4 - [ROCK2_HUMAN]                           | 0,027 | 1,23 | 0,012 | 0,015 |  |  |
| Q15843   | NEDD8 OS=Homo sapiens GN=NEDD8 PE=1 SV=1 - [NEDD8_HUMAN]                                                     | 0,027 | 1,17 | 0,025 | 0,002 |  |  |
| Q4G0N4-2 | Isoform 2 of NAD kinase 2, mitochondrial OS=Homo sapiens GN=NADK2 - [NAKD2_HUMAN]                            | 0,027 | 1,15 | 0,023 | 0,003 |  |  |
| Q9UBT7-3 | Isoform 3 of Alpha-catulin OS=Homo sapiens GN=CTNNA1 - [CTNL1_HUMAN]                                         | 0,027 | 1,74 | 0,017 | 0,010 |  |  |
| Q9UBC2-3 | Isoform 3 of Epidermal growth factor receptor substrate 15-like 1 OS=Homo sapiens GN=EPS15L1 - [EP15R_HUMAN] | 0,027 | 1,09 | 0,027 | 0,000 |  |  |
| Q8N6G6   | ADAMTS-like protein 1 OS=Homo sapiens GN=ADAMTSL1 PE=1 SV=4 - [ATL1_HUMAN]                                   | 0,027 | 1,46 | 0,010 | 0,017 |  |  |
| Q8TET4   | Neutral alpha-glucosidase C OS=Homo sapiens GN=GANC PE=2 SV=3 - [GANC_HUMAN]                                 | 0,027 | 1,36 | 0,015 | 0,012 |  |  |
| O60888-3 | Isoform C of Protein CutA OS=Homo sapiens GN=CUTA - [CUTA_HUMAN]                                             | 0,027 | 1,37 | 0,014 | 0,012 |  |  |
| P46934-4 | Isoform 4 of E3 ubiquitin-protein ligase NEDD4 OS=Homo sapiens GN=NEDD4 - [NEDD4_HUMAN]                      | 0,027 | 1,34 | 0,009 | 0,018 |  |  |
| Q00613-2 | Isoform Short of Heat shock factor protein 1 OS=Homo sapiens GN=HSF1 - [HSF1_HUMAN]                          | 0,027 | 1,13 | 0,025 | 0,002 |  |  |
| Q15121   | Astrocytic phosphoprotein PEA-15 OS=Homo sapiens GN=PEA15 PE=1 SV=2 - [PEA15_HUMAN]                          | 0,027 | 1,21 | 0,023 | 0,004 |  |  |
| Q53LP3   | Ankyrin repeat domain-containing protein SOWAHC OS=Homo sapiens GN=SOWAHC PE=1 SV=1 - [SWAHC_HUMAN]          | 0,027 | 1,18 | 0,020 | 0,007 |  |  |
| Q9UNE7-2 | Isoform 2 of E3 ubiquitin-protein ligase CHIP OS=Homo sapiens GN=STUB1 - [CHIP_HUMAN]                        | 0,027 | 1,27 | 0,015 | 0,011 |  |  |
| Q8N573-8 | Isoform 8 of Oxidation resistance protein 1 OS=Homo sapiens GN=OXR1 - [OXR1_HUMAN]                           | 0,027 | 1,24 | 0,019 | 0,008 |  |  |
| P48960-2 | Isoform 2 of CD97 antigen OS=Homo sapiens GN=CD97 - [CD97_HUMAN]                                             | 0,027 | 1,52 | 0,026 | 0,000 |  |  |
| Q9P2K6   | Kelch-like protein 42 OS=Homo sapiens GN=KLHL42 PE=1 SV=2 - [KLH42_HUMAN]                                    | 0,027 | 1,62 | 0,015 | 0,012 |  |  |
| Q14289-2 | Isoform 2 of Protein-tyrosine kinase 2-beta OS=Homo sapiens GN=PTK2B - [FAK2_HUMAN]                          | 0,027 | 1,34 | 0,013 | 0,014 |  |  |

|          |                                                                                                                  |       |      |       |       |
|----------|------------------------------------------------------------------------------------------------------------------|-------|------|-------|-------|
| Q9UBP9   | PTB domain-containing engulfment adapter protein 1 OS=Homo sapiens GN=GULP1 PE=1 SV=1 - [GULP1_HUMAN]            | 0,027 | 1,27 | 0,016 | 0,010 |
| Q9NQ48-3 | Isoform 3 of Leucine zipper transcription factor-like protein 1 OS=Homo sapiens GN=LZTFL1 - [LZTFL1_HUMAN]       | 0,026 | 1,16 | 0,015 | 0,012 |
| O95861-4 | Isoform 4 of 3'(2'),5'-bisphosphate nucleotidase 1 OS=Homo sapiens GN=BPNT1 - [BPNT1_HUMAN]                      | 0,026 | 1,09 | 0,017 | 0,010 |
| Q9H3U1-2 | Isoform 2 of Protein unc-45 homolog A OS=Homo sapiens GN=UNC45A - [UNC45A_HUMAN]                                 | 0,026 | 1,17 | 0,017 | 0,009 |
| Q7L7X3-3 | Isoform 3 of Serine/threonine-protein kinase TAO1 OS=Homo sapiens GN=TAOK1 - [TAOK1_HUMAN]                       | 0,026 | 1,09 | 0,015 | 0,012 |
| O75628   | GTP-binding protein REM 1 OS=Homo sapiens GN=REM1 PE=1 SV=2 - [REM1_HUMAN]                                       | 0,026 | 1,46 | 0,014 | 0,013 |
| Q16513-2 | Isoform 2 of Serine/threonine-protein kinase N2 OS=Homo sapiens GN=PKN2 - [PKN2_HUMAN]                           | 0,026 | 1,22 | 0,014 | 0,012 |
| Q08431   | Lactadherin OS=Homo sapiens GN=MFG8 PE=1 SV=2 - [MFGM_HUMAN]                                                     | 0,026 | 1,48 | 0,023 | 0,003 |
| P52294   | Importin subunit alpha-5 OS=Homo sapiens GN=KPNA1 PE=1 SV=3 - [IMAS_HUMAN]                                       | 0,026 | 1,17 | 0,022 | 0,004 |
| Q9P2K5-3 | Isoform 3 of Myelin expression factor 2 OS=Homo sapiens GN=MYEF2 - [MYEF2_HUMAN]                                 | 0,026 | 1,30 | 0,013 | 0,014 |
| Q6ZMJ4-2 | Isoform 2 of Interleukin-34 OS=Homo sapiens GN=IL34 - [IL34_HUMAN]                                               | 0,026 | 1,43 | 0,014 | 0,012 |
| Q9BUK6-5 | Isoform 5 of Protein misato homolog 1 OS=Homo sapiens GN=MSTO1 - [MSTO1_HUMAN]                                   | 0,026 | 1,17 | 0,026 | 0,000 |
| Q96EC8   | Protein YIPF6 OS=Homo sapiens GN=YIPF6 PE=1 SV=2 - [YIPF6_HUMAN]                                                 | 0,026 | 1,18 | 0,025 | 0,002 |
| O60551   | Glycylpeptide N-tetradecanoyltransferase 2 OS=Homo sapiens GN=NMT2 PE=1 SV=1 - [NMT2_HUMAN]                      | 0,026 | 1,15 | 0,021 | 0,005 |
| Q9Y266   | Nuclear migration protein nudC OS=Homo sapiens GN=NUDC PE=1 SV=1 - [NUDC_HUMAN]                                  | 0,026 | 1,10 | 0,017 | 0,009 |
| Q9BV57   | 1,2-dihydroxy-3-keto-5-methylthiopentene dioxygenase OS=Homo sapiens GN=ADI1 PE=1 SV=1 - [MTND_HUMAN]            | 0,026 | 1,29 | 0,019 | 0,007 |
| P51911   | Calponin-1 OS=Homo sapiens GN=CNN1 PE=1 SV=2 - [CNN1_HUMAN]                                                      | 0,026 | 1,49 | 0,014 | 0,012 |
| Q9NZN3   | EH domain-containing protein 3 OS=Homo sapiens GN=EHD3 PE=1 SV=2 - [EHD3_HUMAN]                                  | 0,026 | 1,45 | 0,013 | 0,013 |
| Q9UMX5   | Neudesin OS=Homo sapiens GN=NENF PE=1 SV=1 - [NENF_HUMAN]                                                        | 0,026 | 1,20 | 0,014 | 0,012 |
| A6NIH7   | Protein unc-119 homolog B OS=Homo sapiens GN=UNC119B PE=1 SV=1 - [U119B_HUMAN]                                   | 0,026 | 1,15 | 0,021 | 0,004 |
| Q86YT6   | E3 ubiquitin-protein ligase MIB1 OS=Homo sapiens GN=MIB1 PE=1 SV=1 - [MIB1_HUMAN]                                | 0,026 | 1,16 | 0,022 | 0,004 |
| Q53SF7-4 | Isoform 4 of Cordon-bleu protein-like 1 OS=Homo sapiens GN=COBLL1 - [COBL1_HUMAN]                                | 0,026 | 1,18 | 0,010 | 0,016 |
| Q8N6Y2   | Leucine-rich repeat-containing protein 17 OS=Homo sapiens GN=LRR17 PE=2 SV=1 - [LRC17_HUMAN]                     | 0,026 | 1,50 | 0,017 | 0,009 |
| P13591-4 | Isoform 4 of Neural cell adhesion molecule 1 OS=Homo sapiens GN=NCAM1 - [NCAM1_HUMAN]                            | 0,026 | 2,37 | 0,024 | 0,002 |
| P24844   | Myosin regulatory light polypeptide 9 OS=Homo sapiens GN=MYL9 PE=1 SV=4 - [MYL9_HUMAN]                           | 0,026 | 1,37 | 0,014 | 0,012 |
| P09471-2 | Isoform Alpha-2 of Guanine nucleotide-binding protein G(o) subunit alpha OS=Homo sapiens GN=GNAO1 - [GNAO_HUMAN] | 0,026 | 1,85 | 0,014 | 0,011 |
| Q15642-2 | Isoform 2 of Cdc42-interacting protein 4 OS=Homo sapiens GN=TRIP10 - [CIP4_HUMAN]                                | 0,026 | 1,27 | 0,017 | 0,009 |
| O75578-3 | Isoform 3 of Integrin alpha-10 OS=Homo sapiens GN=ITGA10 - [ITA10_HUMAN]                                         | 0,026 | 1,40 | 0,018 | 0,007 |
| P08133   | Annexin A6 OS=Homo sapiens GN=ANXA6 PE=1 SV=3 - [ANXA6_HUMAN]                                                    | 0,026 | 1,20 | 0,016 | 0,010 |
| P09486   | SPARC OS=Homo sapiens GN=SPARC PE=1 SV=1 - [SPRC_HUMAN]                                                          | 0,026 | 1,40 | 0,020 | 0,006 |
| P22061   | Protein-L-isoaspartate(D-aspartate) O-methyltransferase OS=Homo sapiens GN=PCMT1 PE=1 SV=4 - [PIMT_HUMAN]        | 0,026 | 1,41 | 0,021 | 0,005 |
| O43237-2 | Isoform 2 of Cytoplasmic dynein 1 light intermediate chain 2 OS=Homo sapiens GN=DYNC1L2 - [DC1L2_HUMAN]          | 0,026 | 1,06 | 0,022 | 0,003 |

|          |                                                                                                                                       |       |      |       |       |
|----------|---------------------------------------------------------------------------------------------------------------------------------------|-------|------|-------|-------|
| P55083   | Microfibril-associated glycoprotein 4 OS=Homo sapiens GN=MFAP4 PE=1 SV=2 - [MFAP4_HUMAN]                                              | 0,026 | 1,86 | 0,016 | 0,010 |
| Q96EQ0   | Small glutamine-rich tetratricopeptide repeat-containing protein beta OS=Homo sapiens GN=SGTB PE=1 SV=1 - [SGTB_HUMAN]                | 0,026 | 1,20 | 0,013 | 0,013 |
| Q14714   | Sarcospan OS=Homo sapiens GN=SSPN PE=2 SV=3 - [SSPN_HUMAN]                                                                            | 0,026 | 1,52 | 0,021 | 0,004 |
| Q6UXI9   | Nephronectin OS=Homo sapiens GN=NPNT PE=2 SV=3 - [NPNT_HUMAN]                                                                         | 0,026 | 1,73 | 0,019 | 0,006 |
| Q9UNF0-2 | Isoform 2 of Protein kinase C and casein kinase substrate in neurons protein 2 OS=Homo sapiens GN=PACSIN2 - [PACSIN2_HUMAN]           | 0,026 | 1,15 | 0,019 | 0,006 |
| O15498   | Synaptobrevin homolog YKT6 OS=Homo sapiens GN=YKT6 PE=1 SV=1 - [YKT6_HUMAN]                                                           | 0,025 | 1,13 | 0,016 | 0,010 |
| Q14642   | Type I inositol 1,4,5-trisphosphate 5-phosphatase OS=Homo sapiens GN=INPP5A PE=1 SV=1 - [ISP1_HUMAN]                                  | 0,025 | 1,25 | 0,014 | 0,012 |
| Q86UU1-3 | Isoform 3 of Pleckstrin homology-like domain family B member 1 OS=Homo sapiens GN=PHLDB1 - [PHLB1_HUMAN]                              | 0,025 | 1,22 | 0,016 | 0,009 |
| P11216   | Glycogen phosphorylase, brain form OS=Homo sapiens GN=PYGB PE=1 SV=5 - [PYGB_HUMAN]                                                   | 0,025 | 1,32 | 0,025 | 0,001 |
| Q96DR7   | Rho guanine nucleotide exchange factor 26 OS=Homo sapiens GN=ARHGQ PE=1 SV=4 - [ARHGQ_HUMAN]                                          | 0,025 | 1,35 | 0,014 | 0,012 |
| P08572   | Collagen alpha-2(IV) chain OS=Homo sapiens GN=COL4A2 PE=1 SV=4 - [CO4A2_HUMAN]                                                        | 0,025 | 1,28 | 0,021 | 0,004 |
| P36871   | Phosphoglucomutase-1 OS=Homo sapiens GN=PGM1 PE=1 SV=3 - [PGM1_HUMAN]                                                                 | 0,025 | 1,34 | 0,016 | 0,009 |
| Q6IQ22   | Ras-related protein Rab-12 OS=Homo sapiens GN=RAB12 PE=1 SV=3 - [RAB12_HUMAN]                                                         | 0,025 | 1,27 | 0,007 | 0,018 |
| O95926-2 | Isoform 2 of Pre-mRNA-splicing factor SYF2 OS=Homo sapiens GN=SYF2 - [SYF2_HUMAN]                                                     | 0,025 | 1,28 | 0,016 | 0,009 |
| P30626-3 | Isoform 3 of Sorcin OS=Homo sapiens GN=SRI - [SORCN_HUMAN]                                                                            | 0,025 | 1,19 | 0,019 | 0,007 |
| P30153   | Serine/threonine-protein phosphatase 2A 65 kDa regulatory subunit A alpha isoform OS=Homo sapiens GN=PPP2R1A PE=1 SV=4 - [2AAA_HUMAN] | 0,025 | 1,13 | 0,017 | 0,008 |
| O60237   | Protein phosphatase 1 regulatory subunit 12B OS=Homo sapiens GN=PPP1R12B PE=1 SV=2 - [MYPT2_HUMAN]                                    | 0,025 | 1,27 | 0,012 | 0,013 |
| Q6ZN30-2 | Isoform 2 of Zinc finger protein basonuclin-2 OS=Homo sapiens GN=BNC2 - [BNC2_HUMAN]                                                  | 0,025 | 1,47 | 0,017 | 0,009 |
| O75157-2 | Isoform 2 of TSC22 domain family protein 2 OS=Homo sapiens GN=TSC22D2 - [T22D2_HUMAN]                                                 | 0,025 | 1,26 | 0,024 | 0,001 |
| Q9UJ04   | Testis-specific Y-encoded-like protein 4 OS=Homo sapiens GN=TSPYL4 PE=1 SV=2 - [TSPYL4_HUMAN]                                         | 0,025 | 1,15 | 0,015 | 0,010 |
| P40123   | Adenylyl cyclase-associated protein 2 OS=Homo sapiens GN=CAP2 PE=1 SV=1 - [CAP2_HUMAN]                                                | 0,025 | 1,24 | 0,012 | 0,013 |
| P50238   | Cysteine-rich protein 1 OS=Homo sapiens GN=CRIP1 PE=1 SV=3 - [CRIP1_HUMAN]                                                            | 0,025 | 1,58 | 0,018 | 0,007 |
| P40763-3 | Isoform 3 of Signal transducer and activator of transcription 3 OS=Homo sapiens GN=STAT3 - [STAT3_HUMAN]                              | 0,025 | 1,14 | 0,023 | 0,002 |
| Q9UM47   | Neurogenic locus notch homolog protein 3 OS=Homo sapiens GN=NOTCH3 PE=1 SV=2 - [NOTC3_HUMAN]                                          | 0,025 | 1,37 | 0,012 | 0,013 |
| O75475   | PC4 and SFRS1-interacting protein OS=Homo sapiens GN=PSIP1 PE=1 SV=1 - [PSIP1_HUMAN]                                                  | 0,025 | 1,36 | 0,014 | 0,011 |
| Q96JY6-4 | Isoform 4 of PDZ and LIM domain protein 2 OS=Homo sapiens GN=PDLIM2 - [PDLI2_HUMAN]                                                   | 0,025 | 1,17 | 0,018 | 0,007 |
| Q15404   | Ras suppressor protein 1 OS=Homo sapiens GN=RSU1 PE=1 SV=3 - [RSU1_HUMAN]                                                             | 0,025 | 1,28 | 0,014 | 0,011 |
| Q99497   | Protein deglycase DJ-1 OS=Homo sapiens GN=PARK7 PE=1 SV=2 - [PARK7_HUMAN]                                                             | 0,025 | 1,18 | 0,019 | 0,006 |
| P43034   | Platelet-activating factor acetylhydrolase IB subunit alpha OS=Homo sapiens GN=PFAH1B1 PE=1 SV=2 - [LIS1_HUMAN]                       | 0,025 | 1,18 | 0,020 | 0,005 |
| Q8NCHO   | Carbohydrate sulfotransferase 14 OS=Homo sapiens GN=CHST14 PE=1 SV=2 - [CHSTE_HUMAN]                                                  | 0,025 | 1,67 | 0,022 | 0,002 |
| Q96ST3   | Paired amphipathic helix protein Sin3a OS=Homo sapiens GN=SIN3A PE=1 SV=2 - [SIN3A_HUMAN]                                             | 0,025 | 1,12 | 0,018 | 0,007 |

|          |                                                                                                                       |       |      |       |       |
|----------|-----------------------------------------------------------------------------------------------------------------------|-------|------|-------|-------|
| Q99436-2 | Isoform 2 of Proteasome subunit beta type-7 OS=Homo sapiens GN=PSMB7 - [PSB7_HUMAN]                                   | 0,025 | 1,24 | 0,014 | 0,011 |
| P13611-5 | Isoform Vint of Versican core protein OS=Homo sapiens GN=VCAN - [CSPG2_HUMAN]                                         | 0,025 | 1,97 | 0,023 | 0,002 |
| P13797   | Plastin-3 OS=Homo sapiens GN=PLS3 PE=1 SV=4 - [PLST_HUMAN]                                                            | 0,025 | 1,30 | 0,019 | 0,006 |
| Q9Y281-3 | Isoform 3 of Cofilin-2 OS=Homo sapiens GN=CFL2 - [COF2_HUMAN]                                                         | 0,025 | 1,32 | 0,016 | 0,009 |
| Q6NZY7   | Cdc42 effector protein 5 OS=Homo sapiens GN=CDC42EP5 PE=2 SV=1 - [BORG3_HUMAN]                                        | 0,025 | 1,19 | 0,022 | 0,003 |
| Q9UBP4   | Dickkopf-related protein 3 OS=Homo sapiens GN=DKK3 PE=1 SV=2 - [DKK3_HUMAN]                                           | 0,025 | 1,84 | 0,018 | 0,007 |
| O43813   | LanC-like protein 1 OS=Homo sapiens GN=LANCL1 PE=1 SV=1 - [LANC1_HUMAN]                                               | 0,025 | 1,22 | 0,014 | 0,011 |
| Q96I34   | Protein phosphatase 1 regulatory subunit 16A OS=Homo sapiens GN=PPP1R16A PE=1 SV=1 - [PP16A_HUMAN]                    | 0,025 | 1,22 | 0,011 | 0,014 |
| Q9NSY0   | Nuclear receptor-binding protein 2 OS=Homo sapiens GN=NRBP2 PE=2 SV=2 - [NRBP2_HUMAN]                                 | 0,025 | 1,22 | 0,014 | 0,010 |
| O14733   | Dual specificity mitogen-activated protein kinase kinase 7 OS=Homo sapiens GN=MAP2K7 PE=1 SV=2 - [MP2K7_HUMAN]        | 0,025 | 1,13 | 0,022 | 0,003 |
| Q9C0E8-2 | Isoform 2 of Protein lunapark OS=Homo sapiens GN=LNP - [LNP_HUMAN]                                                    | 0,025 | 1,23 | 0,013 | 0,011 |
| P60981   | Destrin OS=Homo sapiens GN=DSTN PE=1 SV=3 - [DEST_HUMAN]                                                              | 0,025 | 1,28 | 0,020 | 0,004 |
| P48059-3 | Isoform 3 of LIM and senescent cell antigen-like-containing domain protein 1 OS=Homo sapiens GN=LIMS1 - [LIMS1_HUMAN] | 0,025 | 1,29 | 0,007 | 0,018 |
| P55196   | Afadin OS=Homo sapiens GN=MLLT4 PE=1 SV=3 - [AFAD_HUMAN]                                                              | 0,025 | 1,18 | 0,012 | 0,013 |
| Q16851   | UTP--glucose-1-phosphate uridylyltransferase OS=Homo sapiens GN=UGP2 PE=1 SV=5 - [UGPA_HUMAN]                         | 0,025 | 1,16 | 0,021 | 0,004 |
| Q9NZM3-4 | Isoform 4 of Intersectin-2 OS=Homo sapiens GN=ITSN2 - [ITSN2_HUMAN]                                                   | 0,025 | 1,18 | 0,017 | 0,008 |
| Q9BY44-3 | Isoform 3 of Eukaryotic translation initiation factor 2A OS=Homo sapiens GN=EIF2A - [EIF2A_HUMAN]                     | 0,025 | 1,20 | 0,023 | 0,001 |
| Q8N1G4   | Leucine-rich repeat-containing protein 47 OS=Homo sapiens GN=LRR47 PE=1 SV=1 - [LRC47_HUMAN]                          | 0,025 | 1,15 | 0,019 | 0,006 |
| Q9BZG1-4 | Isoform 4 of Ras-related protein Rab-34 OS=Homo sapiens GN=RAB34 - [RAB34_HUMAN]                                      | 0,025 | 1,23 | 0,019 | 0,006 |
| Q13976-2 | Isoform Beta of cGMP-dependent protein kinase 1 OS=Homo sapiens GN=PRKG1 - [KGP1_HUMAN]                               | 0,025 | 1,25 | 0,020 | 0,005 |
| Q6AZY7-2 | Isoform 2 of Scavenger receptor class A member 3 OS=Homo sapiens GN=SCARA3 - [SCAR3_HUMAN]                            | 0,025 | 1,54 | 0,019 | 0,006 |
| P20336   | Ras-related protein Rab-3A OS=Homo sapiens GN=RAB3A PE=1 SV=1 - [RAB3A_HUMAN]                                         | 0,025 | 1,24 | 0,010 | 0,015 |
| Q8WUY3-4 | Isoform 4 of Protein prune homolog 2 OS=Homo sapiens GN=PRUNE2 - [PRUN2_HUMAN]                                        | 0,025 | 1,39 | 0,015 | 0,010 |
| Q6NW29   | RWD domain-containing protein 4 OS=Homo sapiens GN=RWDD4 PE=1 SV=3 - [RWDD4_HUMAN]                                    | 0,025 | 1,14 | 0,024 | 0,001 |
| P51178   | 1-phosphatidylinositol 4,5-bisphosphate phosphodiesterase delta-1 OS=Homo sapiens GN=PLCD1 PE=1 SV=2 - [PLCD1_HUMAN]  | 0,025 | 1,17 | 0,023 | 0,002 |
| Q5JR59   | Microtubule-associated tumor suppressor candidate 2 OS=Homo sapiens GN=MTUS2 PE=1 SV=3 - [MTUS2_HUMAN]                | 0,025 | 1,43 | 0,011 | 0,013 |
| P04792   | Heat shock protein beta-1 OS=Homo sapiens GN=HSPB1 PE=1 SV=2 - [HSPB1_HUMAN]                                          | 0,024 | 1,27 | 0,015 | 0,009 |
| Q9HD33-3 | Isoform 3 of 39S ribosomal protein L47, mitochondrial OS=Homo sapiens GN=MRPL47 - [RM47_HUMAN]                        | 0,024 | 1,18 | 0,020 | 0,004 |
| Q9Y625   | Glypican-6 OS=Homo sapiens GN=GPC6 PE=1 SV=1 - [GPC6_HUMAN]                                                           | 0,024 | 1,75 | 0,016 | 0,008 |
| P19022-2 | Isoform 2 of Cadherin-2 OS=Homo sapiens GN=CDH2 - [CADH2_HUMAN]                                                       | 0,024 | 1,35 | 0,021 | 0,003 |
| Q93063   | Exostosin-2 OS=Homo sapiens GN=EXT2 PE=1 SV=1 - [EXT2_HUMAN]                                                          | 0,024 | 1,70 | 0,015 | 0,009 |
| P02511   | Alpha-crystallin B chain OS=Homo sapiens GN=CRYAB PE=1 SV=2 - [CRYAB_HUMAN]                                           | 0,024 | 1,38 | 0,024 | 0,000 |

|          |                                                                                                                       |       |      |       |       |
|----------|-----------------------------------------------------------------------------------------------------------------------|-------|------|-------|-------|
| P12429   | Annexin A3 OS=Homo sapiens GN=ANXA3 PE=1 SV=3 - [ANXA3_HUMAN]                                                         | 0,024 | 1,91 | 0,013 | 0,011 |
| P53420   | Collagen alpha-4(IV) chain OS=Homo sapiens GN=COL4A4 PE=1 SV=3 - [CO4A4_HUMAN]                                        | 0,024 | 1,54 | 0,022 | 0,002 |
| Q4KMQ2-3 | Isoform 3 of Anoctamin-6 OS=Homo sapiens GN=ANO6 - [ANO6_HUMAN]                                                       | 0,024 | 1,26 | 0,013 | 0,011 |
| P05230   | Fibroblast growth factor 1 OS=Homo sapiens GN=FGF1 PE=1 SV=1 - [FGF1_HUMAN]                                           | 0,024 | 1,29 | 0,011 | 0,013 |
| O75368   | SH3 domain-binding glutamic acid-rich-like protein OS=Homo sapiens GN=SH3BGLR PE=1 SV=1 - [SH3L1_HUMAN]               | 0,024 | 1,20 | 0,014 | 0,011 |
| Q15020-4 | Isoform 4 of Squamous cell carcinoma antigen recognized by T-cells 3 OS=Homo sapiens GN=SART3 - [SART3_HUMAN]         | 0,024 | 1,26 | 0,018 | 0,006 |
| O94832   | Unconventional myosin-1d OS=Homo sapiens GN=MYO1D PE=1 SV=2 - [MYO1D_HUMAN]                                           | 0,024 | 1,24 | 0,019 | 0,006 |
| O15230   | Laminin subunit alpha-5 OS=Homo sapiens GN=LAMA5 PE=1 SV=8 - [LAMA5_HUMAN]                                            | 0,024 | 1,23 | 0,016 | 0,008 |
| Q96JQ0   | Protocadherin-16 OS=Homo sapiens GN=DCHS1 PE=1 SV=1 - [PCD16_HUMAN]                                                   | 0,024 | 1,45 | 0,017 | 0,007 |
| Q9UGI8-2 | Isoform 2 of Testin OS=Homo sapiens GN=TES - [TES_HUMAN]                                                              | 0,024 | 1,40 | 0,015 | 0,009 |
| O60271-4 | Isoform 4 of C-Jun-amino-terminal kinase-interacting protein 4 OS=Homo sapiens GN=SPAG9 - [JIP4_HUMAN]                | 0,024 | 1,15 | 0,018 | 0,006 |
| P23352   | Anosmin-1 OS=Homo sapiens GN=ANOS1 PE=1 SV=3 - [KALM_HUMAN]                                                           | 0,024 | 1,34 | 0,016 | 0,008 |
| Q75T13-2 | Isoform 2 of GPI inositol-deacylase OS=Homo sapiens GN=PGAP1 - [PGAP1_HUMAN]                                          | 0,024 | 1,16 | 0,022 | 0,002 |
| Q5JRA6-2 | Isoform 2 of Melanoma inhibitory activity protein 3 OS=Homo sapiens GN=MIA3 - [MIA3_HUMAN]                            | 0,024 | 1,05 | 0,019 | 0,005 |
| Q9Y2G5-2 | Isoform B of GDP-fucose protein O-fucosyltransferase 2 OS=Homo sapiens GN=POFUT2 - [OFUT2_HUMAN]                      | 0,024 | 1,19 | 0,019 | 0,005 |
| Q9P227-2 | Isoform 2 of Rho GTPase-activating protein 23 OS=Homo sapiens GN=ARHGAP23 - [RHG23_HUMAN]                             | 0,024 | 1,17 | 0,020 | 0,004 |
| O43294-2 | Isoform 2 of Transforming growth factor beta-1-induced transcript 1 protein OS=Homo sapiens GN=TGFB11 - [TGF11_HUMAN] | 0,024 | 1,17 | 0,017 | 0,007 |
| O75970-5 | Isoform 4 of Multiple PDZ domain protein OS=Homo sapiens GN=MPDZ - [MPDZ_HUMAN]                                       | 0,024 | 1,17 | 0,013 | 0,010 |
| Q8IW45-4 | Isoform 4 of ATP-dependent (S)-NAD(P)H-hydrate dehydratase OS=Homo sapiens GN=CARKD - [NNRD_HUMAN]                    | 0,024 | 1,34 | 0,018 | 0,006 |
| P62847-2 | Isoform 2 of 40S ribosomal protein S24 OS=Homo sapiens GN=RPS24 - [RS24_HUMAN]                                        | 0,024 | 1,46 | 0,020 | 0,004 |
| Q9H3U7   | SPARC-related modular calcium-binding protein 2 OS=Homo sapiens GN=SMOC2 PE=2 SV=2 - [SMOC2_HUMAN]                    | 0,024 | 1,30 | 0,020 | 0,003 |
| Q96FW1   | Ubiquitin thioesterase OTUB1 OS=Homo sapiens GN=OTUB1 PE=1 SV=2 - [OTUB1_HUMAN]                                       | 0,024 | 1,15 | 0,020 | 0,003 |
| Q9H082   | Ras-related protein Rab-33B OS=Homo sapiens GN=RAB33B PE=1 SV=1 - [RB33B_HUMAN]                                       | 0,024 | 1,19 | 0,012 | 0,012 |
| Q7L0Y3   | Mitochondrial ribonuclease P protein 1 OS=Homo sapiens GN=TRMT10C PE=1 SV=2 - [MRRP1_HUMAN]                           | 0,023 | 1,49 | 0,020 | 0,004 |
| O14495   | Phospholipid phosphatase 3 OS=Homo sapiens GN=PLPP3 PE=1 SV=1 - [PLPP3_HUMAN]                                         | 0,023 | 1,34 | 0,017 | 0,006 |
| Q6GMV3   | Putative peptidyl-tRNA hydrolase PTRHD1 OS=Homo sapiens GN=PTRHD1 PE=1 SV=1 - [PTRD1_HUMAN]                           | 0,023 | 1,17 | 0,020 | 0,003 |
| Q8WW12-2 | Isoform 2 of PEST proteolytic signal-containing nuclear protein OS=Homo sapiens GN=PCNP - [PCNP_HUMAN]                | 0,023 | 1,20 | 0,019 | 0,005 |
| O95359-3 | Isoform 3 of Transforming acidic coiled-coil-containing protein 2 OS=Homo sapiens GN=TACC2 - [TACC2_HUMAN]            | 0,023 | 1,28 | 0,015 | 0,008 |
| Q9NTK5-2 | Isoform 2 of Obg-like ATPase 1 OS=Homo sapiens GN=OLA1 - [OLA1_HUMAN]                                                 | 0,023 | 1,14 | 0,023 | 0,000 |
| P55011-3 | Isoform 2 of Solute carrier family 12 member 2 OS=Homo sapiens GN=SLC12A2 - [S12A2_HUMAN]                             | 0,023 | 1,20 | 0,016 | 0,007 |
| Q7Z3D6-5 | Isoform 5 of UPF0317 protein C14orf159, mitochondrial OS=Homo sapiens GN=C14orf159 -                                  | 0,023 | 1,60 | 0,021 | 0,002 |

|           |                                                                                                                                |       |      |       |       |
|-----------|--------------------------------------------------------------------------------------------------------------------------------|-------|------|-------|-------|
|           | [CN159_HUMAN]                                                                                                                  |       |      |       |       |
| Q13425    | Beta-2-syntrophin OS=Homo sapiens GN=SNTB2 PE=1 SV=1 - [SNTB2_HUMAN]                                                           | 0,023 | 1,35 | 0,015 | 0,008 |
| Q9P1Z2-4  | Isoform 4 of Calcium-binding and coiled-coil domain-containing protein 1 OS=Homo sapiens GN=CALCOCO1 - [CACO1_HUMAN]           | 0,023 | 1,27 | 0,017 | 0,007 |
| P63092-3  | Isoform 3 of Guanine nucleotide-binding protein G(s) subunit alpha isoforms short OS=Homo sapiens GN=GNAS - [GNAS2_HUMAN]      | 0,023 | 1,23 | 0,019 | 0,004 |
| Q8WX93-3  | Isoform 3 of Palladin OS=Homo sapiens GN=PALLD - [PALLD_HUMAN]                                                                 | 0,023 | 1,25 | 0,014 | 0,009 |
| P11413    | Glucose-6-phosphate 1-dehydrogenase OS=Homo sapiens GN=G6PD PE=1 SV=4 - [G6PD_HUMAN]                                           | 0,023 | 1,12 | 0,020 | 0,003 |
| O00233-2  | Isoform p27-S of 26S proteasome non-ATPase regulatory subunit 9 OS=Homo sapiens GN=PSMD9 - [PSMD9_HUMAN]                       | 0,023 | 1,09 | 0,019 | 0,004 |
| P21926    | CD9 antigen OS=Homo sapiens GN=CD9 PE=1 SV=4 - [CD9_HUMAN]                                                                     | 0,023 | 1,44 | 0,019 | 0,004 |
| Q13642-1  | Isoform 1 of Four and a half LIM domains protein 1 OS=Homo sapiens GN=FHL1 - [FHL1_HUMAN]                                      | 0,023 | 1,29 | 0,020 | 0,003 |
| Q8WVM7-2  | Isoform 2 of Cohesin subunit SA-1 OS=Homo sapiens GN=STAG1 - [STAG1_HUMAN]                                                     | 0,023 | 1,15 | 0,022 | 0,001 |
| Q5EBL4    | RILP-like protein 1 OS=Homo sapiens GN=RILPL1 PE=1 SV=1 - [RILPL1_HUMAN]                                                       | 0,023 | 1,25 | 0,021 | 0,002 |
| Q8IVN8    | Somatomedin-B and thrombospondin type-1 domain-containing protein OS=Homo sapiens GN=SBSPON PE=1 SV=2 - [SBSPON_HUMAN]         | 0,023 | 1,79 | 0,021 | 0,001 |
| O00178    | GTP-binding protein 1 OS=Homo sapiens GN=GTPBP1 PE=1 SV=3 - [GTPBP1_HUMAN]                                                     | 0,023 | 1,12 | 0,017 | 0,006 |
| P30622-2  | Isoform 3 of CAP-Gly domain-containing linker protein 1 OS=Homo sapiens GN=CLIP1 - [CLIP1_HUMAN]                               | 0,023 | 1,11 | 0,023 | 0,000 |
| Q9Y4D1-2  | Isoform 2 of Disheveled-associated activator of morphogenesis 1 OS=Homo sapiens GN=DAAM1 - [DAAM1_HUMAN]                       | 0,023 | 1,17 | 0,016 | 0,007 |
| O95425-4  | Isoform SV4 of Supravillin OS=Homo sapiens GN=SVIL - [SVIL_HUMAN]                                                              | 0,023 | 1,27 | 0,017 | 0,005 |
| O43175    | D-3-phosphoglycerate dehydrogenase OS=Homo sapiens GN=PHGDH PE=1 SV=4 - [SERA_HUMAN]                                           | 0,023 | 1,38 | 0,022 | 0,000 |
| P62736    | Actin, aortic smooth muscle OS=Homo sapiens GN=ACTA2 PE=1 SV=1 - [ACTA_HUMAN]                                                  | 0,023 | 1,24 | 0,018 | 0,004 |
| P56199    | Integrin alpha-1 OS=Homo sapiens GN=ITGA1 PE=1 SV=2 - [ITA1_HUMAN]                                                             | 0,023 | 1,20 | 0,013 | 0,010 |
| Q13418    | Integrin-linked protein kinase OS=Homo sapiens GN=ILK PE=1 SV=2 - [ILK_HUMAN]                                                  | 0,023 | 1,23 | 0,014 | 0,009 |
| Q9ULV0    | Unconventional myosin-Vb OS=Homo sapiens GN=MYO5B PE=1 SV=3 - [MYO5B_HUMAN]                                                    | 0,023 | 1,52 | 0,017 | 0,006 |
| O95630-2  | Isoform 2 of STAM-binding protein OS=Homo sapiens GN=STABBP - [STABP_HUMAN]                                                    | 0,023 | 1,14 | 0,020 | 0,002 |
| Q03001    | Dystonin OS=Homo sapiens GN=DST PE=1 SV=4 - [DYST_HUMAN]                                                                       | 0,023 | 1,08 | 0,015 | 0,007 |
| Q8N436    | Inactive carboxypeptidase-like protein X2 OS=Homo sapiens GN=CPXM2 PE=2 SV=3 - [CPXM2_HUMAN]                                   | 0,022 | 1,39 | 0,015 | 0,007 |
| P16035    | Metalloproteinase inhibitor 2 OS=Homo sapiens GN=TIMP2 PE=1 SV=2 - [TIMP2_HUMAN]                                               | 0,022 | 1,42 | 0,018 | 0,004 |
| Q9HBG6-11 | Isoform 11 of Intraflagellar transport protein 122 homolog OS=Homo sapiens GN=IFT122 - [IFT122_HUMAN]                          | 0,022 | 1,22 | 0,018 | 0,004 |
| P67775-2  | Isoform 2 of Serine/threonine-protein phosphatase 2A catalytic subunit alpha isoform OS=Homo sapiens GN=PPP2CA - [PP2AA_HUMAN] | 0,022 | 1,19 | 0,017 | 0,005 |
| Q8IX30    | Signal peptide, CUB and EGF-like domain-containing protein 3 OS=Homo sapiens GN=SCUBE3 PE=1 SV=1 - [SCUB3_HUMAN]               | 0,022 | 1,61 | 0,020 | 0,003 |
| Q92625    | Ankyrin repeat and SAM domain-containing protein 1A OS=Homo sapiens GN=ANKS1A PE=1 SV=4 - [ANS1A_HUMAN]                        | 0,022 | 1,21 | 0,019 | 0,004 |
| P80404    | 4-aminobutyrate aminotransferase, mitochondrial OS=Homo sapiens GN=ABAT PE=1 SV=3 - [GABT_HUMAN]                               | 0,022 | 1,25 | 0,019 | 0,004 |

|          |                                                                                                                                 |       |      |       |       |
|----------|---------------------------------------------------------------------------------------------------------------------------------|-------|------|-------|-------|
| P18084   | Integrin beta-5 OS=Homo sapiens GN=ITGB5 PE=1 SV=1 - [ITB5_HUMAN]                                                               | 0,022 | 1,42 | 0,018 | 0,004 |
| Q8I WV2  | Contactin-4 OS=Homo sapiens GN=CNTN4 PE=1 SV=1 - [CNTN4_HUMAN]                                                                  | 0,022 | 1,41 | 0,020 | 0,002 |
| O00151   | PDZ and LIM domain protein 1 OS=Homo sapiens GN=PDLIM1 PE=1 SV=4 - [PDL1_HUMAN]                                                 | 0,022 | 1,33 | 0,016 | 0,006 |
| Q8IXJ6-2 | Isoform 2 of NAD-dependent protein deacetylase sirtuin-2 OS=Homo sapiens GN=SIRT2 - [SIRT2_HUMAN]                               | 0,022 | 1,10 | 0,021 | 0,001 |
| P62805   | Histone H4 OS=Homo sapiens GN=HIST1H4A PE=1 SV=2 - [H4_HUMAN]                                                                   | 0,022 | 1,16 | 0,020 | 0,002 |
| Q99622   | Protein C10 OS=Homo sapiens GN=C12orf57 PE=1 SV=1 - [C10_HUMAN]                                                                 | 0,022 | 1,27 | 0,021 | 0,001 |
| P54750-3 | Isoform 3 of Calcium/calmodulin-dependent 3',5'-cyclic nucleotide phosphodiesterase 1A OS=Homo sapiens GN=PDE1A - [PDE1A_HUMAN] | 0,022 | 1,17 | 0,010 | 0,012 |
| O60245   | Protocadherin-7 OS=Homo sapiens GN=PCDH7 PE=1 SV=2 - [PCDH7_HUMAN]                                                              | 0,022 | 1,29 | 0,020 | 0,002 |
| P10909-4 | Isoform 4 of Clusterin OS=Homo sapiens GN=CLU - [CLUS_HUMAN]                                                                    | 0,022 | 1,38 | 0,021 | 0,001 |
| Q8WUM4   | Programmed cell death 6-interacting protein OS=Homo sapiens GN=PDC6IP PE=1 SV=1 - [PDC6I_HUMAN]                                 | 0,022 | 1,13 | 0,013 | 0,009 |
| Q14643-4 | Isoform 4 of Inositol 1,4,5-trisphosphate receptor type 1 OS=Homo sapiens GN=ITPR1 - [ITPR1_HUMAN]                              | 0,022 | 1,19 | 0,019 | 0,003 |
| O43150-2 | Isoform 2 of Arf-GAP with SH3 domain, ANK repeat and PH domain-containing protein 2 OS=Homo sapiens GN=ASAP2 - [ASAP2_HUMAN]    | 0,022 | 1,18 | 0,016 | 0,006 |
| Q96DH6-2 | Isoform 2 of RNA-binding protein Musashi homolog 2 OS=Homo sapiens GN=MSI2 - [MSI2H_HUMAN]                                      | 0,022 | 1,26 | 0,016 | 0,006 |
| O94851-2 | Isoform 2 of Protein-methionine sulfoxide oxidase MICAL2 OS=Homo sapiens GN=MICAL2 - [MICAL2_HUMAN]                             | 0,022 | 1,17 | 0,020 | 0,002 |
| O95631   | Netrin-1 OS=Homo sapiens GN=NTN1 PE=1 SV=2 - [NET1_HUMAN]                                                                       | 0,022 | 1,73 | 0,014 | 0,008 |
| Q86V58   | Protein Hook homolog 3 OS=Homo sapiens GN=HOOK3 PE=1 SV=2 - [HOOK3_HUMAN]                                                       | 0,022 | 1,10 | 0,020 | 0,001 |
| P04406-2 | Isoform 2 of Glyceraldehyde-3-phosphate dehydrogenase OS=Homo sapiens GN=GAPDH - [G3P_HUMAN]                                    | 0,022 | 1,10 | 0,021 | 0,000 |
| Q8N612   | FTS and Hook-interacting protein OS=Homo sapiens GN=FAM160A2 PE=1 SV=3 - [F16A2_HUMAN]                                          | 0,022 | 1,14 | 0,021 | 0,001 |
| Q9NUJ1   | Mycophenolic acid acyl-glucuronide esterase, mitochondrial OS=Homo sapiens GN=ABHD10 PE=1 SV=1 - [ABHDA_HUMAN]                  | 0,022 | 1,30 | 0,014 | 0,007 |
| Q14203-3 | Isoform 3 of Dynactin subunit 1 OS=Homo sapiens GN=DCTN1 - [DCTN1_HUMAN]                                                        | 0,022 | 1,10 | 0,015 | 0,006 |
| P53814-5 | Isoform B2 of Smoothelin OS=Homo sapiens GN=SMTN - [SMTN_HUMAN]                                                                 | 0,022 | 1,40 | 0,017 | 0,005 |
| P54725-2 | Isoform 2 of UV excision repair protein RAD23 homolog A OS=Homo sapiens GN=RAD23A - [RD23A_HUMAN]                               | 0,022 | 1,16 | 0,017 | 0,004 |
| Q9HCB6   | Spondin-1 OS=Homo sapiens GN=SPON1 PE=1 SV=2 - [SPON1_HUMAN]                                                                    | 0,022 | 1,81 | 0,013 | 0,008 |
| P07437   | Tubulin beta chain OS=Homo sapiens GN=TUBB PE=1 SV=2 - [TBB5_HUMAN]                                                             | 0,022 | 1,06 | 0,019 | 0,002 |
| Q9BZL4-3 | Isoform 3 of Protein phosphatase 1 regulatory subunit 12C OS=Homo sapiens GN=PPP1R12C - [PP12C_HUMAN]                           | 0,021 | 1,19 | 0,019 | 0,002 |
| O43795-2 | Isoform 2 of Unconventional myosin-Ib OS=Homo sapiens GN=MYO1B - [MYO1B_HUMAN]                                                  | 0,021 | 1,16 | 0,013 | 0,009 |
| Q12860-2 | Isoform 2 of Contactin-1 OS=Homo sapiens GN=CNTN1 - [CNTN1_HUMAN]                                                               | 0,021 | 1,84 | 0,018 | 0,004 |
| Q9BR39   | Junctophilin-2 OS=Homo sapiens GN=JPH2 PE=1 SV=2 - [JPH2_HUMAN]                                                                 | 0,021 | 1,19 | 0,020 | 0,001 |
| O75688-5 | Isoform 5 of Protein phosphatase 1B OS=Homo sapiens GN=PPM1B - [PPM1B_HUMAN]                                                    | 0,021 | 1,27 | 0,021 | 0,000 |
| Q9BSJ2-3 | Isoform 2 of Gamma-tubulin complex component 2 OS=Homo sapiens GN=TUBGCP2 - [GCP2_HUMAN]                                        | 0,021 | 1,12 | 0,019 | 0,002 |

|          |                                                                                                                       |       |      |       |       |
|----------|-----------------------------------------------------------------------------------------------------------------------|-------|------|-------|-------|
| Q9Y608-2 | Isoform 2 of Leucine-rich repeat flightless-interacting protein 2 OS=Homo sapiens GN=LRRFIP2 - [LRRF2_HUMAN]          | 0,021 | 1,17 | 0,016 | 0,005 |
| Q9UBI6   | Guanine nucleotide-binding protein G(I)/G(S)/G(O) subunit gamma-12 OS=Homo sapiens GN=GNG12 PE=1 SV=3 - [GBG12_HUMAN] | 0,021 | 1,22 | 0,016 | 0,005 |
| P07951   | Tropomyosin beta chain OS=Homo sapiens GN=TPM2 PE=1 SV=1 - [TPM2_HUMAN]                                               | 0,021 | 1,45 | 0,017 | 0,004 |
| O00186   | Syntaxin-binding protein 3 OS=Homo sapiens GN=STXB3 PE=1 SV=2 - [STXB3_HUMAN]                                         | 0,021 | 1,16 | 0,011 | 0,010 |
| Q9NR46   | Endophilin-B2 OS=Homo sapiens GN=SH3GLB2 PE=1 SV=1 - [SHLB2_HUMAN]                                                    | 0,021 | 1,28 | 0,018 | 0,003 |
| Q13618-3 | Isoform 3 of Cullin-3 OS=Homo sapiens GN=CUL3 - [CUL3_HUMAN]                                                          | 0,021 | 1,19 | 0,018 | 0,003 |
| P29536-2 | Isoform 2 of Leiomodlin-1 OS=Homo sapiens GN=LMOD1 - [LMOD1_HUMAN]                                                    | 0,021 | 1,30 | 0,017 | 0,004 |
| Q16270   | Insulin-like growth factor-binding protein 7 OS=Homo sapiens GN=IGFBP7 PE=1 SV=1 - [IBP7_HUMAN]                       | 0,021 | 1,28 | 0,019 | 0,001 |
| O95816   | BAG family molecular chaperone regulator 2 OS=Homo sapiens GN=BAG2 PE=1 SV=1 - [BAG2_HUMAN]                           | 0,021 | 1,28 | 0,019 | 0,002 |
| Q8N283   | Ankyrin repeat domain-containing protein 35 OS=Homo sapiens GN=ANKRD35 PE=2 SV=2 - [ANR35_HUMAN]                      | 0,020 | 1,28 | 0,019 | 0,002 |
| P11532-4 | Isoform 3 of Dystrophin OS=Homo sapiens GN=DMD - [DMD_HUMAN]                                                          | 0,020 | 1,23 | 0,018 | 0,003 |
| Q6EEV4-2 | Isoform 5 of DNA-directed RNA polymerase II subunit GRINL1A, isoforms 4/5 OS=Homo sapiens GN=POLR2M - [GL1AD_HUMAN]   | 0,020 | 1,16 | 0,019 | 0,001 |
| Q9UIQ6-3 | Isoform 3 of Leucyl-cystinyl aminopeptidase OS=Homo sapiens GN=LNPEP - [LCAP_HUMAN]                                   | 0,020 | 1,16 | 0,017 | 0,003 |
| Q5T9L3-2 | Isoform 2 of Protein wntless homolog OS=Homo sapiens GN=WLS - [WLS_HUMAN]                                             | 0,020 | 1,27 | 0,016 | 0,004 |
| Q99523   | Sortilin OS=Homo sapiens GN=SORT1 PE=1 SV=3 - [SORT_HUMAN]                                                            | 0,020 | 1,21 | 0,018 | 0,002 |
| O43639   | Cytoplasmic protein NCK2 OS=Homo sapiens GN=NCK2 PE=1 SV=2 - [NCK2_HUMAN]                                             | 0,020 | 1,19 | 0,018 | 0,001 |
| P21397   | Amine oxidase [flavin-containing] A OS=Homo sapiens GN=MAOA PE=1 SV=1 - [AOPA_HUMAN]                                  | 0,020 | 1,17 | 0,017 | 0,003 |
| Q63ZY3-3 | Isoform 3 of KN motif and ankyrin repeat domain-containing protein 2 OS=Homo sapiens GN=KANK2 - [KANK2_HUMAN]         | 0,020 | 1,21 | 0,014 | 0,005 |
| Q8N2S1-2 | Isoform 2 of Latent-transforming growth factor beta-binding protein 4 OS=Homo sapiens GN=LTBP4 - [LTBP4_HUMAN]        | 0,019 | 1,40 | 0,013 | 0,006 |
| Q15124   | Phosphoglucomutase-like protein 5 OS=Homo sapiens GN=PGM5 PE=1 SV=2 - [PGM5_HUMAN]                                    | 0,019 | 1,37 | 0,018 | 0,001 |
| P0DI83   | Ras-related protein Rab-34, isoform NARR OS=Homo sapiens GN=RAB34 PE=1 SV=1 - [NARR_HUMAN]                            | 0,019 | 1,12 | 0,011 | 0,008 |
| O00401   | Neural Wiskott-Aldrich syndrome protein OS=Homo sapiens GN=WASL PE=1 SV=2 - [WASL_HUMAN]                              | 0,019 | 1,13 | 0,017 | 0,002 |
| P32119   | Peroxiredoxin-2 OS=Homo sapiens GN=PRDX2 PE=1 SV=5 - [PRDX2_HUMAN]                                                    | 0,019 | 1,15 | 0,010 | 0,009 |
| O60437   | Periplakin OS=Homo sapiens GN=PPL PE=1 SV=4 - [PEPL_HUMAN]                                                            | 0,019 | 1,33 | 0,017 | 0,002 |
| P49023-2 | Isoform Alpha of Paxillin OS=Homo sapiens GN=PXXN - [PAXI_HUMAN]                                                      | 0,019 | 1,15 | 0,013 | 0,006 |
| P40818   | Ubiquitin carboxyl-terminal hydrolase 8 OS=Homo sapiens GN=USP8 PE=1 SV=1 - [UBP8_HUMAN]                              | 0,019 | 1,15 | 0,013 | 0,005 |
| Q9UIC8   | Leucine carboxyl methyltransferase 1 OS=Homo sapiens GN=LCMT1 PE=1 SV=2 - [LCMT1_HUMAN]                               | 0,019 | 1,09 | 0,015 | 0,003 |
| Q5BJF6-2 | Isoform 2 of Outer dense fiber protein 2 OS=Homo sapiens GN=ODF2 - [ODFP2_HUMAN]                                      | 0,018 | 1,14 | 0,018 | 0,001 |
| P50552   | Vasodilator-stimulated phosphoprotein OS=Homo sapiens GN=VASP PE=1 SV=3 - [VASP_HUMAN]                                | 0,018 | 1,09 | 0,015 | 0,003 |
| P27348   | 14-3-3 protein theta OS=Homo sapiens GN=YWHAQ PE=1 SV=1 - [1433T_HUMAN]                                               | 0,018 | 1,12 | 0,017 | 0,002 |
| P62070-3 | Isoform 3 of Ras-related protein R-Ras2 OS=Homo sapiens GN=RRAS2 - [RRAS2_HUMAN]                                      | 0,018 | 1,25 | 0,016 | 0,002 |
| Q96AC1   | Fermitin family homolog 2 OS=Homo sapiens GN=FERMT2 PE=1 SV=1 - [FERM2_HUMAN]                                         | 0,018 | 1,18 | 0,018 | 0,000 |



|          |                                                                                                           |       |      |       |       |
|----------|-----------------------------------------------------------------------------------------------------------|-------|------|-------|-------|
| Q9H2U2   | Inorganic pyrophosphatase 2, mitochondrial OS=Homo sapiens GN=PPA2 PE=1 SV=2 - [IPYR2_HUMAN]              | 0,018 | 1,34 | 0,017 | 0,001 |
| P61626   | Lysozyme C OS=Homo sapiens GN=LYZ PE=1 SV=1 - [LYSC_HUMAN]                                                | 0,018 | 1,28 | 0,015 | 0,003 |
| P05204   | Non-histone chromosomal protein HMG-17 OS=Homo sapiens GN=HMGN2 PE=1 SV=3 - [HMGN2_HUMAN]                 | 0,018 | 1,16 | 0,010 | 0,007 |
| Q7Z2X4-3 | Isoform 3 of PTB-containing, cubilin and LRP1-interacting protein OS=Homo sapiens GN=PID1 - [PCL11_HUMAN] | 0,018 | 1,30 | 0,015 | 0,003 |
| Q16558   | Calcium-activated potassium channel subunit beta-1 OS=Homo sapiens GN=KCNMB1 PE=1 SV=5 - [KCNMB1_HUMAN]   | 0,018 | 1,23 | 0,017 | 0,000 |
| Q15654   | Thyroid receptor-interacting protein 6 OS=Homo sapiens GN=TRIP6 PE=1 SV=3 - [TRIP6_HUMAN]                 | 0,018 | 1,27 | 0,016 | 0,002 |
| Q92765   | Secreted frizzled-related protein 3 OS=Homo sapiens GN=FRZB PE=1 SV=2 - [SFRP3_HUMAN]                     | 0,017 | 1,47 | 0,016 | 0,001 |
| P46108-2 | Isoform Crk-I of Adapter molecule crk OS=Homo sapiens GN=CRK - [CRK_HUMAN]                                | 0,017 | 1,09 | 0,015 | 0,002 |
| Q03135   | Caveolin-1 OS=Homo sapiens GN=CAV1 PE=1 SV=4 - [CAV1_HUMAN]                                               | 0,017 | 1,16 | 0,013 | 0,004 |
| P25686-2 | Isoform 2 of Dnaj homolog subfamily B member 2 OS=Homo sapiens GN=DNAJB2 - [DNJB2_HUMAN]                  | 0,017 | 1,20 | 0,014 | 0,003 |
| O95810   | Serum deprivation-response protein OS=Homo sapiens GN=SDPR PE=1 SV=3 - [SDPR_HUMAN]                       | 0,017 | 1,23 | 0,011 | 0,006 |
| O60879-2 | Isoform 2 of Protein diaphanous homolog 2 OS=Homo sapiens GN=DIAPH2 - [DIAP2_HUMAN]                       | 0,016 | 1,12 | 0,015 | 0,000 |
| P61353   | 60S ribosomal protein L27 OS=Homo sapiens GN=RPL27 PE=1 SV=2 - [RL27_HUMAN]                               | 0,016 | 1,40 | 0,015 | 0,000 |
| P26038   | Moesin OS=Homo sapiens GN=MSN PE=1 SV=3 - [MOES_HUMAN]                                                    | 0,015 | 1,05 | 0,013 | 0,003 |
| Q9Y2A7   | Nck-associated protein 1 OS=Homo sapiens GN=NCKAP1 PE=1 SV=1 - [NCKP1_HUMAN]                              | 0,015 | 1,22 | 0,012 | 0,002 |
| P28370-2 | Isoform 2 of Probable global transcription activator SNF2L1 OS=Homo sapiens GN=SMARCA1 - [SMCA1_HUMAN]    | 0,012 | 1,10 | 0,011 | 0,001 |

**Proteins downregulated in BAV dilated samples**

| Protein accession number | Protein name                                                                                     | Loading value <sup>a</sup> | Fold change | jack-knife (JK) confidence interval <sup>b</sup> | ABS (Loading value)-ABS(JK) <sup>c</sup> |
|--------------------------|--------------------------------------------------------------------------------------------------|----------------------------|-------------|--------------------------------------------------|------------------------------------------|
| Q9BXW7-2                 | Isoform 1 of Cat eye syndrome critical region protein 5 OS=Homo sapiens GN=CECR5 - [CECR5_HUMAN] | -0,038                     | 0,47        | 0,020                                            | 0,018                                    |
| Q96JG6                   | Syndetin OS=Homo sapiens GN=VPS50 PE=1 SV=3 - [VPS50_HUMAN]                                      | -0,037                     | 0,55        | 0,020                                            | 0,017                                    |
| Q9H089                   | Large subunit GTPase 1 homolog OS=Homo sapiens GN=LSG1 PE=1 SV=2 - [LSG1_HUMAN]                  | -0,037                     | 0,54        | 0,013                                            | 0,024                                    |
| P18440                   | Arylamine N-acetyltransferase 1 OS=Homo sapiens GN=NAT1 PE=1 SV=2 - [ARY1_HUMAN]                 | -0,036                     | 0,70        | 0,019                                            | 0,017                                    |
| Q9NR30                   | Nucleolar RNA helicase 2 OS=Homo sapiens GN=DDX21 PE=1 SV=5 - [DDX21_HUMAN]                      | -0,035                     | 0,80        | 0,022                                            | 0,013                                    |
| P27695                   | DNA-(apurinic or apyrimidinic site) lyase OS=Homo sapiens GN=APEX1 PE=1 SV=2 - [APEX1_HUMAN]     | -0,035                     | 0,83        | 0,010                                            | 0,026                                    |
| P22033                   | Methylmalonyl-CoA mutase, mitochondrial OS=Homo sapiens GN=MUT PE=1 SV=4 - [MUTA_HUMAN]          | -0,035                     | 0,69        | 0,015                                            | 0,020                                    |
| Q00653-4                 | Isoform 4 of Nuclear factor NF-kappa-B p100 subunit OS=Homo sapiens GN=NFKB2 - [NFKB2_HUMAN]     | -0,035                     | 0,73        | 0,011                                            | 0,024                                    |
| Q9H6T3-2                 | Isoform 2 of RNA polymerase II-associated protein 3 OS=Homo sapiens GN=RPAP3 - [RPAP3_HUMAN]     | -0,034                     | 0,75        | 0,022                                            | 0,012                                    |
| Q16134-3                 | Isoform 2 of Electron transfer flavoprotein-ubiquinone oxidoreductase, mitochondrial OS=Homo     | -0,034                     | 0,77        | 0,030                                            | 0,004                                    |

|          |                                                                                                                 |        |      |       |       |
|----------|-----------------------------------------------------------------------------------------------------------------|--------|------|-------|-------|
|          | sapiens GN=ETFDH - [ETFD_HUMAN]                                                                                 |        |      |       |       |
| P23246-2 | Isoform Short of Splicing factor, proline- and glutamine-rich OS=Homo sapiens GN=SFPQ - [SFPQ_HUMAN]            | -0,034 | 0,82 | 0,013 | 0,021 |
| P05455   | Lupus La protein OS=Homo sapiens GN=SSB PE=1 SV=2 - [LA_HUMAN]                                                  | -0,034 | 0,91 | 0,017 | 0,017 |
| O75165   | DnaJ homolog subfamily C member 13 OS=Homo sapiens GN=DNAJC13 PE=1 SV=5 - [DJC13_HUMAN]                         | -0,034 | 0,83 | 0,015 | 0,019 |
| O43768   | Alpha-endosulfine OS=Homo sapiens GN=ENSA PE=1 SV=1 - [ENSA_HUMAN]                                              | -0,034 | 0,84 | 0,034 | 0,000 |
| Q9P258   | Protein RCC2 OS=Homo sapiens GN=RCC2 PE=1 SV=2 - [RCC2_HUMAN]                                                   | -0,034 | 0,43 | 0,011 | 0,022 |
| Q01968-2 | Isoform B of Inositol polyphosphate 5-phosphatase OCRL-1 OS=Homo sapiens GN=OCRL - [OCRL_HUMAN]                 | -0,034 | 0,79 | 0,015 | 0,019 |
| Q13148   | TAR DNA-binding protein 43 OS=Homo sapiens GN=TARDBP PE=1 SV=1 - [TADBP_HUMAN]                                  | -0,034 | 0,82 | 0,017 | 0,016 |
| O43353-2 | Isoform 2 of Receptor-interacting serine/threonine-protein kinase 2 OS=Homo sapiens GN=RIPK2 - [RIPK2_HUMAN]    | -0,034 | 0,71 | 0,020 | 0,014 |
| Q9Y6D5   | Brefeldin A-inhibited guanine nucleotide-exchange protein 2 OS=Homo sapiens GN=ARFGEF2 PE=1 SV=3 - [BIG2_HUMAN] | -0,034 | 0,81 | 0,015 | 0,019 |
| Q9UGT4   | Sushi domain-containing protein 2 OS=Homo sapiens GN=SUSD2 PE=1 SV=1 - [SUSD2_HUMAN]                            | -0,033 | 0,60 | 0,009 | 0,024 |
| Q9Y2W1   | Thyroid hormone receptor-associated protein 3 OS=Homo sapiens GN=THRAP3 PE=1 SV=2 - [TR150_HUMAN]               | -0,033 | 0,80 | 0,010 | 0,023 |
| Q8IXT5   | RNA-binding protein 12B OS=Homo sapiens GN=RBM12B PE=1 SV=2 - [RB12B_HUMAN]                                     | -0,033 | 0,79 | 0,017 | 0,016 |
| P18031   | Tyrosine-protein phosphatase non-receptor type 1 OS=Homo sapiens GN=PTPN1 PE=1 SV=1 - [PTN1_HUMAN]              | -0,033 | 0,65 | 0,012 | 0,021 |
| Q9HCC0-2 | Isoform 2 of Methylcrotonoyl-CoA carboxylase beta chain, mitochondrial OS=Homo sapiens GN=MCCC2 - [MCCB_HUMAN]  | -0,033 | 0,61 | 0,022 | 0,011 |
| Q12802-4 | Isoform 3 of A-kinase anchor protein 13 OS=Homo sapiens GN=AKAP13 - [AKP13_HUMAN]                               | -0,033 | 0,71 | 0,010 | 0,023 |
| Q9HBI0-3 | Isoform 3 of Gamma-parvin OS=Homo sapiens GN=PARVG - [PARVG_HUMAN]                                              | -0,033 | 0,33 | 0,009 | 0,024 |
| P19484-2 | Isoform 2 of Transcription factor EB OS=Homo sapiens GN=TFEB - [TFEB_HUMAN]                                     | -0,033 | 0,80 | 0,022 | 0,011 |
| O00499-9 | Isoform BIN1-10-13 of Myc box-dependent-interacting protein 1 OS=Homo sapiens GN=BIN1 - [BIN1_HUMAN]            | -0,033 | 0,71 | 0,008 | 0,025 |
| Q9UEE9-2 | Isoform 2 of Craniofacial development protein 1 OS=Homo sapiens GN=CFDP1 - [CFDP1_HUMAN]                        | -0,033 | 0,80 | 0,020 | 0,013 |
| Q9H2W1   | Membrane-spanning 4-domains subfamily A member 6A OS=Homo sapiens GN=MS4A6A PE=2 SV=1 - [M4A6A_HUMAN]           | -0,032 | 0,56 | 0,015 | 0,017 |
| O14776-2 | Isoform 2 of Transcription elongation regulator 1 OS=Homo sapiens GN=TCERG1 - [TCRG1_HUMAN]                     | -0,032 | 0,73 | 0,010 | 0,022 |
| P49961-3 | Isoform 3 of Ectonucleoside triphosphate diphosphohydrolase 1 OS=Homo sapiens GN=ENTPD1 - [ENTP1_HUMAN]         | -0,032 | 0,56 | 0,004 | 0,028 |
| P07910-2 | Isoform C1 of Heterogeneous nuclear ribonucleoproteins C1/C2 OS=Homo sapiens GN=HNRNPC - [HNRPC_HUMAN]          | -0,032 | 0,76 | 0,016 | 0,016 |
| Q92888-2 | Isoform 2 of Rho guanine nucleotide exchange factor 1 OS=Homo sapiens GN=ARHGEF1 - [ARHG1_HUMAN]                | -0,032 | 0,80 | 0,011 | 0,021 |
| P20339-2 | Isoform 2 of Ras-related protein Rab-5A OS=Homo sapiens GN=RAB5A - [RAB5A_HUMAN]                                | -0,032 | 0,58 | 0,022 | 0,010 |
| Q9BV38   | WD repeat-containing protein 18 OS=Homo sapiens GN=WDR18 PE=1 SV=2 - [WDR18_HUMAN]                              | -0,032 | 0,74 | 0,015 | 0,017 |
| Q86WA6-2 | Isoform 2 of Valacyclovir hydrolase OS=Homo sapiens GN=BPHL - [BPHL_HUMAN]                                      | -0,032 | 0,77 | 0,017 | 0,015 |
| Q6UW02   | Cytochrome P450 20A1 OS=Homo sapiens GN=CYP20A1 PE=1 SV=1 - [CP20A_HUMAN]                                       | -0,032 | 0,77 | 0,026 | 0,005 |
| Q6DHV7-2 | Isoform 2 of Adenosine deaminase-like protein OS=Homo sapiens GN=ADAL - [ADAL_HUMAN]                            | -0,032 | 0,78 | 0,022 | 0,010 |

|          |                                                                                                                      |        |      |       |       |
|----------|----------------------------------------------------------------------------------------------------------------------|--------|------|-------|-------|
| P09874   | Poly [ADP-ribose] polymerase 1 OS=Homo sapiens GN=PARP1 PE=1 SV=4 - [PARP1_HUMAN]                                    | -0,032 | 0,80 | 0,017 | 0,015 |
| Q16666-3 | Isoform 3 of Gamma-interferon-inducible protein 16 OS=Homo sapiens GN=IFI16 - [IFI16_HUMAN]                          | -0,032 | 0,52 | 0,008 | 0,023 |
| Q8IVF2-3 | Isoform 3 of Protein AHNAK2 OS=Homo sapiens GN=AHNAK2 - [AHNK2_HUMAN]                                                | -0,032 | 0,71 | 0,020 | 0,011 |
| Q92692-2 | Isoform Alpha of Nectin-2 OS=Homo sapiens GN=PVRL2 - [PVRL2_HUMAN]                                                   | -0,032 | 0,64 | 0,015 | 0,017 |
| Q00839-2 | Isoform Short of Heterogeneous nuclear ribonucleoprotein U OS=Homo sapiens GN=HNRNPU - [HNRPU_HUMAN]                 | -0,032 | 0,93 | 0,020 | 0,011 |
| Q9H3G5   | Probable serine carboxypeptidase CPVL OS=Homo sapiens GN=CPVL PE=1 SV=2 - [CPVL_HUMAN]                               | -0,032 | 0,24 | 0,011 | 0,021 |
| Q14141-2 | Isoform I of Septin-6 OS=Homo sapiens GN=SEPT6 - [SEPT6_HUMAN]                                                       | -0,032 | 0,61 | 0,014 | 0,018 |
| Q9H845   | Acyl-CoA dehydrogenase family member 9, mitochondrial OS=Homo sapiens GN=ACAD9 PE=1 SV=1 - [ACAD9_HUMAN]             | -0,031 | 0,48 | 0,021 | 0,011 |
| P05787   | Keratin, type II cytoskeletal 8 OS=Homo sapiens GN=KRT8 PE=1 SV=7 - [K2C8_HUMAN]                                     | -0,031 | 0,43 | 0,029 | 0,003 |
| Q92688-2 | Isoform 2 of Acidic leucine-rich nuclear phosphoprotein 32 family member B OS=Homo sapiens GN=ANP32B - [AN32B_HUMAN] | -0,031 | 0,57 | 0,010 | 0,022 |
| Q8TDZ2-2 | Isoform 2 of Protein-methionine sulfoxide oxidase MICAL1 OS=Homo sapiens GN=MICAL1 - [MICA1_HUMAN]                   | -0,031 | 0,68 | 0,025 | 0,006 |
| P49754-2 | Isoform 2 of Vacuolar protein sorting-associated protein 41 homolog OS=Homo sapiens GN=VPS41 - [VPS41_HUMAN]         | -0,031 | 0,69 | 0,017 | 0,014 |
| Q9BZH6   | WD repeat-containing protein 11 OS=Homo sapiens GN=WDR11 PE=1 SV=1 - [WDR11_HUMAN]                                   | -0,031 | 0,89 | 0,019 | 0,012 |
| Q9NUQ9   | Protein FAM49B OS=Homo sapiens GN=FAM49B PE=1 SV=1 - [FA49B_HUMAN]                                                   | -0,031 | 0,49 | 0,012 | 0,019 |
| Q965B3   | Neurabin-2 OS=Homo sapiens GN=PPP1R9B PE=1 SV=2 - [NEB2_HUMAN]                                                       | -0,031 | 0,83 | 0,014 | 0,017 |
| Q13576   | Ras GTPase-activating-like protein IQGAP2 OS=Homo sapiens GN=IQGAP2 PE=1 SV=4 - [IQGA2_HUMAN]                        | -0,031 | 0,37 | 0,010 | 0,021 |
| Q9H0D6-2 | Isoform 2 of 5'-3' exoribonuclease 2 OS=Homo sapiens GN=XRN2 - [XRN2_HUMAN]                                          | -0,031 | 0,41 | 0,015 | 0,016 |
| Q96CX2   | BTB/POZ domain-containing protein KCTD12 OS=Homo sapiens GN=KCTD12 PE=1 SV=1 - [KCD12_HUMAN]                         | -0,031 | 0,71 | 0,015 | 0,016 |
| Q07812-5 | Isoform Epsilon of Apoptosis regulator BAX OS=Homo sapiens GN=BAX - [BAX_HUMAN]                                      | -0,031 | 0,72 | 0,010 | 0,020 |
| Q9NVZ3-3 | Isoform 3 of Adaptin ear-binding coat-associated protein 2 OS=Homo sapiens GN=NECAP2 - [NECP2_HUMAN]                 | -0,031 | 0,53 | 0,016 | 0,015 |
| P00488   | Coagulation factor XIII A chain OS=Homo sapiens GN=F13A1 PE=1 SV=4 - [F13A_HUMAN]                                    | -0,031 | 0,39 | 0,010 | 0,021 |
| Q92541   | RNA polymerase-associated protein RTF1 homolog OS=Homo sapiens GN=RTF1 PE=1 SV=4 - [RTF1_HUMAN]                      | -0,031 | 0,84 | 0,025 | 0,006 |
| Q9H0Q0   | Protein FAM49A OS=Homo sapiens GN=FAM49A PE=2 SV=1 - [FA49A_HUMAN]                                                   | -0,031 | 0,67 | 0,020 | 0,011 |
| P98172   | Ephrin-B1 OS=Homo sapiens GN=EFNB1 PE=1 SV=1 - [EFNB1_HUMAN]                                                         | -0,031 | 0,70 | 0,029 | 0,002 |
| P17813-2 | Isoform Short of Endoglin OS=Homo sapiens GN=ENG - [EGLN_HUMAN]                                                      | -0,031 | 0,46 | 0,022 | 0,008 |
| Q5VTR2   | E3 ubiquitin-protein ligase BRE1A OS=Homo sapiens GN=RNF20 PE=1 SV=2 - [BRE1A_HUMAN]                                 | -0,031 | 0,86 | 0,014 | 0,017 |
| Q16611-2 | Isoform 2 of Bcl-2 homologous antagonist/killer OS=Homo sapiens GN=BAK1 - [BAK_HUMAN]                                | -0,031 | 0,81 | 0,012 | 0,018 |
| P13674-3 | Isoform 3 of Prolyl 4-hydroxylase subunit alpha-1 OS=Homo sapiens GN=P4HA1 - [P4HA1_HUMAN]                           | -0,031 | 0,62 | 0,020 | 0,011 |
| P08575-2 | Isoform 2 of Receptor-type tyrosine-protein phosphatase C OS=Homo sapiens GN=PTPRC - [PTPRC_HUMAN]                   | -0,031 | 0,38 | 0,009 | 0,022 |
| Q9Y4W6   | AFG3-like protein 2 OS=Homo sapiens GN=AFG3L2 PE=1 SV=2 - [AFG32_HUMAN]                                              | -0,031 | 0,81 | 0,016 | 0,014 |
| P19338   | Nucleolin OS=Homo sapiens GN=NCL PE=1 SV=3 - [NUCL_HUMAN]                                                            | -0,031 | 0,87 | 0,018 | 0,012 |

|          |                                                                                                                                                       |        |      |       |       |
|----------|-------------------------------------------------------------------------------------------------------------------------------------------------------|--------|------|-------|-------|
| Q75N90   | Fibrillin-3 OS=Homo sapiens GN=FBN3 PE=2 SV=3 - [FBN3_HUMAN]                                                                                          | -0,031 | 0,80 | 0,017 | 0,013 |
| Q8N1F7   | Nuclear pore complex protein Nup93 OS=Homo sapiens GN=NUP93 PE=1 SV=2 - [NUP93_HUMAN]                                                                 | -0,030 | 0,76 | 0,016 | 0,014 |
| P13796   | Plastin-2 OS=Homo sapiens GN=LCP1 PE=1 SV=6 - [PLSL_HUMAN]                                                                                            | -0,030 | 0,28 | 0,009 | 0,021 |
| Q9NY15   | Stabilin-1 OS=Homo sapiens GN=STAB1 PE=1 SV=3 - [STAB1_HUMAN]                                                                                         | -0,030 | 0,44 | 0,019 | 0,012 |
| Q07955-3 | Isoform ASF-3 of Serine/arginine-rich splicing factor 1 OS=Homo sapiens GN=SRSF1 - [SRSF1_HUMAN]                                                      | -0,030 | 0,86 | 0,019 | 0,012 |
| Q969G3-6 | Isoform 6 of SWI/SNF-related matrix-associated actin-dependent regulator of chromatin subfamily E member 1 OS=Homo sapiens GN=SMARCE1 - [SMCE1_HUMAN] | -0,030 | 0,89 | 0,021 | 0,009 |
| Q9Y394-2 | Isoform 2 of Dehydrogenase/reductase SDR family member 7 OS=Homo sapiens GN=DHRS7 - [DHRS7_HUMAN]                                                     | -0,030 | 0,79 | 0,021 | 0,010 |
| O60762   | Dolichol-phosphate mannosyltransferase subunit 1 OS=Homo sapiens GN=DPM1 PE=1 SV=1 - [DPM1_HUMAN]                                                     | -0,030 | 0,74 | 0,027 | 0,003 |
| Q9Y6W5   | Wiskott-Aldrich syndrome protein family member 2 OS=Homo sapiens GN=WASF2 PE=1 SV=3 - [WASF2_HUMAN]                                                   | -0,030 | 0,79 | 0,018 | 0,012 |
| P46459-2 | Isoform 2 of Vesicle-fusing ATPase OS=Homo sapiens GN=NSF - [NSF_HUMAN]                                                                               | -0,030 | 0,81 | 0,027 | 0,003 |
| P33897   | ATP-binding cassette sub-family D member 1 OS=Homo sapiens GN=ABCD1 PE=1 SV=2 - [ABCD1_HUMAN]                                                         | -0,030 | 0,70 | 0,021 | 0,010 |
| Q9BSB4   | Autophagy-related protein 101 OS=Homo sapiens GN=ATG101 PE=1 SV=1 - [ATGA1_HUMAN]                                                                     | -0,030 | 0,56 | 0,021 | 0,009 |
| Q14764   | Major vault protein OS=Homo sapiens GN=MVP PE=1 SV=4 - [MVP_HUMAN]                                                                                    | -0,030 | 0,65 | 0,012 | 0,018 |
| Q9BW27-3 | Isoform 3 of Nuclear pore complex protein Nup85 OS=Homo sapiens GN=NUP85 - [NUP85_HUMAN]                                                              | -0,030 | 0,76 | 0,020 | 0,010 |
| P48681   | Nestin OS=Homo sapiens GN=NES PE=1 SV=2 - [NEST_HUMAN]                                                                                                | -0,030 | 0,72 | 0,015 | 0,015 |
| Q15029-2 | Isoform 2 of 116 kDa U5 small nuclear ribonucleoprotein component OS=Homo sapiens GN=EFTUD2 - [U5S1_HUMAN]                                            | -0,030 | 0,60 | 0,015 | 0,015 |
| P78527   | DNA-dependent protein kinase catalytic subunit OS=Homo sapiens GN=PRKDC PE=1 SV=3 - [PRKDC_HUMAN]                                                     | -0,030 | 0,86 | 0,020 | 0,010 |
| Q96B97-2 | Isoform 2 of SH3 domain-containing kinase-binding protein 1 OS=Homo sapiens GN=SH3KBP1 - [SH3K1_HUMAN]                                                | -0,030 | 0,61 | 0,011 | 0,019 |
| Q92608   | Dedicator of cytokinesis protein 2 OS=Homo sapiens GN=DOCK2 PE=1 SV=2 - [DOCK2_HUMAN]                                                                 | -0,030 | 0,40 | 0,011 | 0,019 |
| Q6NUQ1   | RAD50-interacting protein 1 OS=Homo sapiens GN=RINT1 PE=1 SV=1 - [RINT1_HUMAN]                                                                        | -0,029 | 0,75 | 0,024 | 0,005 |
| P41218   | Myeloid cell nuclear differentiation antigen OS=Homo sapiens GN=MNDA PE=1 SV=1 - [MNDA_HUMAN]                                                         | -0,029 | 0,47 | 0,009 | 0,021 |
| Q10570   | Cleavage and polyadenylation specificity factor subunit 1 OS=Homo sapiens GN=CPSF1 PE=1 SV=2 - [CPSF1_HUMAN]                                          | -0,029 | 0,74 | 0,021 | 0,009 |
| Q9BVK6   | Transmembrane emp24 domain-containing protein 9 OS=Homo sapiens GN=TMED9 PE=1 SV=2 - [TMED9_HUMAN]                                                    | -0,029 | 0,66 | 0,023 | 0,007 |
| Q99613-2 | Isoform 2 of Eukaryotic translation initiation factor 3 subunit C OS=Homo sapiens GN=EIF3C - [EIF3C_HUMAN]                                            | -0,029 | 0,83 | 0,019 | 0,010 |
| P31146   | Coronin-1A OS=Homo sapiens GN=CORO1A PE=1 SV=4 - [COR1A_HUMAN]                                                                                        | -0,029 | 0,28 | 0,011 | 0,018 |
| P05362   | Intercellular adhesion molecule 1 OS=Homo sapiens GN=ICAM1 PE=1 SV=2 - [ICAM1_HUMAN]                                                                  | -0,029 | 0,25 | 0,016 | 0,013 |
| P33241-2 | Isoform 2 of Lymphocyte-specific protein 1 OS=Homo sapiens GN=LSP1 - [LSP1_HUMAN]                                                                     | -0,029 | 0,27 | 0,011 | 0,018 |
| Q9H792   | Pseudopodium-enriched atypical kinase 1 OS=Homo sapiens GN=PEAK1 PE=1 SV=4 - [PEAK1_HUMAN]                                                            | -0,029 | 0,80 | 0,020 | 0,009 |
| P57740-2 | Isoform 2 of Nuclear pore complex protein Nup107 OS=Homo sapiens GN=NUP107 -                                                                          | -0,029 | 0,78 | 0,017 | 0,012 |

|          |                                                                                                                   |        |      |       |       |
|----------|-------------------------------------------------------------------------------------------------------------------|--------|------|-------|-------|
|          | [NU107_HUMAN]                                                                                                     |        |      |       |       |
| P20700   | Lamin-B1 OS=Homo sapiens GN=LMNB1 PE=1 SV=2 - [LMNB1_HUMAN]                                                       | -0,029 | 0,45 | 0,011 | 0,018 |
| Q96N66-3 | Isoform 3 of Lysophospholipid acyltransferase 7 OS=Homo sapiens GN=MBOAT7 - [MBOAT7_HUMAN]                        | -0,029 | 0,68 | 0,022 | 0,008 |
| Q14112-2 | Isoform 2 of Nidogen-2 OS=Homo sapiens GN=NID2 - [NID2_HUMAN]                                                     | -0,029 | 0,69 | 0,016 | 0,014 |
| Q15528-2 | Isoform Surf5A of Mediator of RNA polymerase II transcription subunit 22 OS=Homo sapiens GN=MED22 - [MED22_HUMAN] | -0,029 | 0,84 | 0,020 | 0,009 |
| Q10713   | Mitochondrial-processing peptidase subunit alpha OS=Homo sapiens GN=PMPCA PE=1 SV=2 - [MPPA_HUMAN]                | -0,029 | 0,78 | 0,019 | 0,010 |
| P06753-5 | Isoform 5 of Tropomyosin alpha-3 chain OS=Homo sapiens GN=TPM3 - [TPM3_HUMAN]                                     | -0,029 | 0,44 | 0,010 | 0,019 |
| P31930   | Cytochrome b-c1 complex subunit 1, mitochondrial OS=Homo sapiens GN=UQCRC1 PE=1 SV=3 - [QCR1_HUMAN]               | -0,029 | 0,68 | 0,017 | 0,012 |
| Q9BXX0   | EMILIN-2 OS=Homo sapiens GN=EMILIN2 PE=1 SV=3 - [EMIL2_HUMAN]                                                     | -0,029 | 0,28 | 0,010 | 0,019 |
| P50454   | Serpin H1 OS=Homo sapiens GN=SERPINH1 PE=1 SV=2 - [SERPH_HUMAN]                                                   | -0,029 | 0,79 | 0,027 | 0,003 |
| P10809   | 60 kDa heat shock protein, mitochondrial OS=Homo sapiens GN=HSPD1 PE=1 SV=2 - [CH60_HUMAN]                        | -0,029 | 0,76 | 0,010 | 0,019 |
| O15117-2 | Isoform FYB-130 of FYN-binding protein OS=Homo sapiens GN=FYB - [FYB_HUMAN]                                       | -0,029 | 0,52 | 0,011 | 0,018 |
| Q9UH62   | Armadillo repeat-containing X-linked protein 3 OS=Homo sapiens GN=ARMCX3 PE=1 SV=1 - [ARMX3_HUMAN]                | -0,029 | 0,71 | 0,023 | 0,006 |
| Q9BQA9-2 | Isoform 2 of Uncharacterized protein C17orf62 OS=Homo sapiens GN=C17orf62 - [CQ062_HUMAN]                         | -0,029 | 0,59 | 0,019 | 0,010 |
| O75643   | U5 small nuclear ribonucleoprotein 200 kDa helicase OS=Homo sapiens GN=SNRNP200 PE=1 SV=2 - [U520_HUMAN]          | -0,029 | 0,84 | 0,017 | 0,012 |
| P09917-3 | Isoform 3 of Arachidonate 5-lipoxygenase OS=Homo sapiens GN=ALOX5 - [LOX5_HUMAN]                                  | -0,029 | 0,24 | 0,008 | 0,021 |
| Q01105-3 | Isoform 3 of Protein SET OS=Homo sapiens GN=SET - [SET_HUMAN]                                                     | -0,029 | 0,75 | 0,014 | 0,015 |
| P05783   | Keratin, type I cytoskeletal 18 OS=Homo sapiens GN=KRT18 PE=1 SV=2 - [K1C18_HUMAN]                                | -0,029 | 0,19 | 0,028 | 0,001 |
| Q8WU90   | Zinc finger CCCH domain-containing protein 15 OS=Homo sapiens GN=ZC3H15 PE=1 SV=1 - [ZC3HF_HUMAN]                 | -0,029 | 0,80 | 0,022 | 0,007 |
| P14735   | Insulin-degrading enzyme OS=Homo sapiens GN=IDE PE=1 SV=4 - [IDE_HUMAN]                                           | -0,029 | 0,76 | 0,016 | 0,013 |
| Q9UPN7   | Serine/threonine-protein phosphatase 6 regulatory subunit 1 OS=Homo sapiens GN=PPP6R1 PE=1 SV=5 - [PP6R1_HUMAN]   | -0,029 | 0,74 | 0,016 | 0,013 |
| P29966   | Myristoylated alanine-rich C-kinase substrate OS=Homo sapiens GN=MARCKS PE=1 SV=4 - [MARCS_HUMAN]                 | -0,029 | 0,39 | 0,010 | 0,018 |
| P52566   | Rho GDP-dissociation inhibitor 2 OS=Homo sapiens GN=ARHGDI2 PE=1 SV=3 - [GDIR2_HUMAN]                             | -0,029 | 0,71 | 0,009 | 0,019 |
| O43615   | Mitochondrial import inner membrane translocase subunit TIM44 OS=Homo sapiens GN=TIMM44 PE=1 SV=2 - [TIM44_HUMAN] | -0,029 | 0,83 | 0,021 | 0,007 |
| O00299   | Chloride intracellular channel protein 1 OS=Homo sapiens GN=CLIC1 PE=1 SV=4 - [CLIC1_HUMAN]                       | -0,029 | 0,84 | 0,018 | 0,010 |
| Q9BRG1   | Vacuolar protein-sorting-associated protein 25 OS=Homo sapiens GN=VPS25 PE=1 SV=1 - [VPS25_HUMAN]                 | -0,029 | 0,87 | 0,018 | 0,010 |
| Q15813   | Tubulin-specific chaperone E OS=Homo sapiens GN=TBCE PE=1 SV=1 - [TBCE_HUMAN]                                     | -0,029 | 0,78 | 0,025 | 0,004 |
| P27144   | Adenylate kinase 4, mitochondrial OS=Homo sapiens GN=AK4 PE=1 SV=1 - [KAD4_HUMAN]                                 | -0,028 | 0,79 | 0,016 | 0,013 |
| P42166   | Lamina-associated polypeptide 2, isoform alpha OS=Homo sapiens GN=TMPO PE=1 SV=2 - [LAP2A_HUMAN]                  | -0,028 | 0,69 | 0,021 | 0,007 |
| P62888   | 60S ribosomal protein L30 OS=Homo sapiens GN=RPL30 PE=1 SV=2 - [RL30_HUMAN]                                       | -0,028 | 0,73 | 0,018 | 0,011 |
| Q99735-2 | Isoform 2 of Microsomal glutathione S-transferase 2 OS=Homo sapiens GN=MGST2 -                                    | -0,028 | 0,77 | 0,025 | 0,003 |

|          |                                                                                                                       |        |      |       |       |
|----------|-----------------------------------------------------------------------------------------------------------------------|--------|------|-------|-------|
|          | [MGST2_HUMAN]                                                                                                         |        |      |       |       |
| Q9UL46   | Proteasome activator complex subunit 2 OS=Homo sapiens GN=PSME2 PE=1 SV=4 - [PSME2_HUMAN]                             | -0,028 | 0,80 | 0,019 | 0,009 |
| P35869   | Aryl hydrocarbon receptor OS=Homo sapiens GN=AHR PE=1 SV=2 - [AHR_HUMAN]                                              | -0,028 | 0,73 | 0,024 | 0,005 |
| P27824   | Calnexin OS=Homo sapiens GN=CANX PE=1 SV=2 - [CALX_HUMAN]                                                             | -0,028 | 0,85 | 0,016 | 0,012 |
| P55058-3 | Isoform 3 of Phospholipid transfer protein OS=Homo sapiens GN=PLTP - [PLTP_HUMAN]                                     | -0,028 | 0,44 | 0,015 | 0,013 |
| Q9Y676   | 28S ribosomal protein S18b, mitochondrial OS=Homo sapiens GN=MRPS18B PE=1 SV=1 - [RT18B_HUMAN]                        | -0,028 | 0,70 | 0,020 | 0,009 |
| P82909   | 28S ribosomal protein S36, mitochondrial OS=Homo sapiens GN=MRPS36 PE=1 SV=2 - [RT36_HUMAN]                           | -0,028 | 0,80 | 0,025 | 0,003 |
| Q9H4B7   | Tubulin beta-1 chain OS=Homo sapiens GN=TUBB1 PE=1 SV=1 - [TBB1_HUMAN]                                                | -0,028 | 0,80 | 0,025 | 0,004 |
| P20020-5 | Isoform E of Plasma membrane calcium-transporting ATPase 1 OS=Homo sapiens GN=ATP2B1 - [AT2B1_HUMAN]                  | -0,028 | 0,72 | 0,019 | 0,010 |
| P19971   | Thymidine phosphorylase OS=Homo sapiens GN=TYMP PE=1 SV=2 - [TYPH_HUMAN]                                              | -0,028 | 0,33 | 0,009 | 0,019 |
| Q5T447   | E3 ubiquitin-protein ligase HECTD3 OS=Homo sapiens GN=HECTD3 PE=1 SV=1 - [HECD3_HUMAN]                                | -0,028 | 0,83 | 0,024 | 0,005 |
| Q9NZ32   | Actin-related protein 10 OS=Homo sapiens GN=ACTR10 PE=1 SV=1 - [ARP10_HUMAN]                                          | -0,028 | 0,83 | 0,027 | 0,001 |
| Q6F181-3 | Isoform 3 of Anamorsin OS=Homo sapiens GN=CIAPIN1 - [CPIN1_HUMAN]                                                     | -0,028 | 0,78 | 0,012 | 0,016 |
| P00738   | Haptoglobin OS=Homo sapiens GN=HP PE=1 SV=1 - [HPT_HUMAN]                                                             | -0,028 | 0,44 | 0,023 | 0,005 |
| Q5T2E6-2 | Isoform 2 of UPF0668 protein C10orf76 OS=Homo sapiens GN=C10orf76 - [CJ076_HUMAN]                                     | -0,028 | 0,76 | 0,021 | 0,007 |
| P16220-3 | Isoform 3 of Cyclic AMP-responsive element-binding protein 1 OS=Homo sapiens GN=CREB1 - [CREB1_HUMAN]                 | -0,028 | 0,80 | 0,024 | 0,004 |
| P14406   | Cytochrome c oxidase subunit 7A2, mitochondrial OS=Homo sapiens GN=COX7A2 PE=1 SV=1 - [CX7A2_HUMAN]                   | -0,028 | 0,61 | 0,019 | 0,008 |
| Q9UGP8   | Translocation protein SEC63 homolog OS=Homo sapiens GN=SEC63 PE=1 SV=2 - [SEC63_HUMAN]                                | -0,028 | 0,79 | 0,021 | 0,007 |
| P06753-6 | Isoform 6 of Tropomyosin alpha-3 chain OS=Homo sapiens GN=TPM3 - [TPM3_HUMAN]                                         | -0,028 | 0,42 | 0,010 | 0,018 |
| Q14C86-4 | Isoform 4 of GTPase-activating protein and VPS9 domain-containing protein 1 OS=Homo sapiens GN=GAPVD1 - [GAPD1_HUMAN] | -0,028 | 0,92 | 0,024 | 0,004 |
| O14745   | Na(+)/H(+) exchange regulatory cofactor NHE-RF1 OS=Homo sapiens GN=SLC9A3R1 PE=1 SV=4 - [NHRF1_HUMAN]                 | -0,028 | 0,75 | 0,024 | 0,004 |
| P08571   | Monocyte differentiation antigen CD14 OS=Homo sapiens GN=CD14 PE=1 SV=2 - [CD14_HUMAN]                                | -0,028 | 0,39 | 0,011 | 0,017 |
| O00592-2 | Isoform 2 of Podocalyxin OS=Homo sapiens GN=PODXL - [PODXL_HUMAN]                                                     | -0,028 | 0,53 | 0,022 | 0,006 |
| P06865   | Beta-hexosaminidase subunit alpha OS=Homo sapiens GN=HEXA PE=1 SV=2 - [HEXA_HUMAN]                                    | -0,028 | 0,72 | 0,008 | 0,020 |
| P04080   | Cystatin-B OS=Homo sapiens GN=CSTB PE=1 SV=2 - [CYTB_HUMAN]                                                           | -0,028 | 0,86 | 0,022 | 0,006 |
| Q9ULZ3-2 | Isoform 2 of Apoptosis-associated speck-like protein containing a CARD OS=Homo sapiens GN=PYCARD - [ASC_HUMAN]        | -0,028 | 0,46 | 0,014 | 0,013 |
| P55008   | Allograft inflammatory factor 1 OS=Homo sapiens GN=AIF1 PE=1 SV=1 - [AIF1_HUMAN]                                      | -0,028 | 0,42 | 0,010 | 0,017 |
| Q96C19   | EF-hand domain-containing protein D2 OS=Homo sapiens GN=EFHD2 PE=1 SV=1 - [EFHD2_HUMAN]                               | -0,028 | 0,53 | 0,012 | 0,016 |
| Q6P2Q9   | Pre-mRNA-processing-splicing factor 8 OS=Homo sapiens GN=PRPF8 PE=1 SV=2 - [PRP8_HUMAN]                               | -0,028 | 0,87 | 0,027 | 0,001 |
| P19320-2 | Isoform 2 of Vascular cell adhesion protein 1 OS=Homo sapiens GN=VCAM1 - [VCAM1_HUMAN]                                | -0,028 | 0,53 | 0,011 | 0,016 |
| P07585   | Decorin OS=Homo sapiens GN=DCN PE=1 SV=1 - [PGS2_HUMAN]                                                               | -0,028 | 0,40 | 0,015 | 0,012 |
| Q7L099   | Protein RUFY3 OS=Homo sapiens GN=RUFY3 PE=1 SV=1 - [RUFY3_HUMAN]                                                      | -0,028 | 0,85 | 0,017 | 0,010 |

|          |                                                                                                                              |        |      |       |       |
|----------|------------------------------------------------------------------------------------------------------------------------------|--------|------|-------|-------|
| Q9UKK3   | Poly [ADP-ribose] polymerase 4 OS=Homo sapiens GN=PARP4 PE=1 SV=3 - [PARP4_HUMAN]                                            | -0,028 | 0,75 | 0,015 | 0,013 |
| P61225   | Ras-related protein Rap-2b OS=Homo sapiens GN=RAP2B PE=1 SV=1 - [RAP2B_HUMAN]                                                | -0,027 | 0,60 | 0,023 | 0,004 |
| P51659   | Peroxisomal multifunctional enzyme type 2 OS=Homo sapiens GN=HSD17B4 PE=1 SV=3 - [DHB4_HUMAN]                                | -0,027 | 0,59 | 0,019 | 0,008 |
| P42765   | 3-ketoacyl-CoA thiolase, mitochondrial OS=Homo sapiens GN=ACAA2 PE=1 SV=2 - [THIM_HUMAN]                                     | -0,027 | 0,67 | 0,019 | 0,008 |
| Q13838   | Spliceosome RNA helicase DDX39B OS=Homo sapiens GN=DDX39B PE=1 SV=1 - [DX39B_HUMAN]                                          | -0,027 | 0,81 | 0,023 | 0,005 |
| P04066   | Tissue alpha-L-fucosidase OS=Homo sapiens GN=FUCA1 PE=1 SV=4 - [FUCO_HUMAN]                                                  | -0,027 | 0,72 | 0,017 | 0,011 |
| Q13637   | Ras-related protein Rab-32 OS=Homo sapiens GN=RAB32 PE=1 SV=3 - [RAB32_HUMAN]                                                | -0,027 | 0,65 | 0,022 | 0,005 |
| P36543   | V-type proton ATPase subunit E 1 OS=Homo sapiens GN=ATP6V1E1 PE=1 SV=1 - [VATE1_HUMAN]                                       | -0,027 | 0,69 | 0,026 | 0,002 |
| P52948-6 | Isoform 6 of Nuclear pore complex protein Nup98-Nup96 OS=Homo sapiens GN=NUP98 - [NUP98_HUMAN]                               | -0,027 | 0,84 | 0,020 | 0,007 |
| Q8TAQ2-2 | Isoform 2 of SWI/SNF complex subunit SMARCC2 OS=Homo sapiens GN=SMARCC2 - [SMRC2_HUMAN]                                      | -0,027 | 0,91 | 0,025 | 0,002 |
| P12270   | Nucleoprotein TPR OS=Homo sapiens GN=TPR PE=1 SV=3 - [TPR_HUMAN]                                                             | -0,027 | 0,90 | 0,017 | 0,010 |
| Q15833-2 | Isoform 2 of Syntaxin-binding protein 2 OS=Homo sapiens GN=STXBP2 - [STXB2_HUMAN]                                            | -0,027 | 0,21 | 0,018 | 0,010 |
| P06737-2 | Isoform 2 of Glycogen phosphorylase, liver form OS=Homo sapiens GN=PYGL - [PYGL_HUMAN]                                       | -0,027 | 0,78 | 0,022 | 0,005 |
| P00367   | Glutamate dehydrogenase 1, mitochondrial OS=Homo sapiens GN=GLUD1 PE=1 SV=2 - [DHE3_HUMAN]                                   | -0,027 | 0,82 | 0,018 | 0,009 |
| Q99714-2 | Isoform 2 of 3-hydroxyacyl-CoA dehydrogenase type-2 OS=Homo sapiens GN=HSD17B10 - [HCD2_HUMAN]                               | -0,027 | 0,88 | 0,022 | 0,005 |
| Q06033-2 | Isoform 2 of Inter-alpha-trypsin inhibitor heavy chain H3 OS=Homo sapiens GN=ITIH3 - [ITIH3_HUMAN]                           | -0,027 | 0,40 | 0,025 | 0,002 |
| P31040-3 | Isoform 3 of Succinate dehydrogenase [ubiquinone] flavoprotein subunit, mitochondrial OS=Homo sapiens GN=SDHA - [SDHA_HUMAN] | -0,027 | 0,75 | 0,025 | 0,002 |
| Q8NEW0   | Zinc transporter 7 OS=Homo sapiens GN=SLC30A7 PE=2 SV=1 - [ZNT7_HUMAN]                                                       | -0,027 | 0,48 | 0,019 | 0,008 |
| O15269   | Serine palmitoyltransferase 1 OS=Homo sapiens GN=SPTLC1 PE=1 SV=1 - [SPTC1_HUMAN]                                            | -0,027 | 0,79 | 0,009 | 0,018 |
| P08238   | Heat shock protein HSP 90-beta OS=Homo sapiens GN=HSP90AB1 PE=1 SV=4 - [HS90B_HUMAN]                                         | -0,027 | 0,87 | 0,019 | 0,008 |
| P43490   | Nicotinamide phosphoribosyltransferase OS=Homo sapiens GN=NAMPT PE=1 SV=1 - [NAMPT_HUMAN]                                    | -0,027 | 0,47 | 0,016 | 0,011 |
| Q10567-2 | Isoform B of AP-1 complex subunit beta-1 OS=Homo sapiens GN=AP1B1 - [AP1B1_HUMAN]                                            | -0,027 | 0,67 | 0,017 | 0,010 |
| P23368   | NAD-dependent malic enzyme, mitochondrial OS=Homo sapiens GN=ME2 PE=1 SV=1 - [MAOM_HUMAN]                                    | -0,027 | 0,51 | 0,022 | 0,005 |
| Q9BXP5-5 | Isoform 5 of Serrate RNA effector molecule homolog OS=Homo sapiens GN=SRRT - [SRRT_HUMAN]                                    | -0,027 | 0,84 | 0,024 | 0,003 |
| Q16799   | Reticulon-1 OS=Homo sapiens GN=RTN1 PE=1 SV=1 - [RTN1_HUMAN]                                                                 | -0,027 | 0,71 | 0,016 | 0,010 |
| O76070   | Gamma-synuclein OS=Homo sapiens GN=SNCG PE=1 SV=2 - [SYUG_HUMAN]                                                             | -0,027 | 0,72 | 0,016 | 0,010 |
| P15586-2 | Isoform 2 of N-acetylglucosamine-6-sulfatase OS=Homo sapiens GN=GNS - [GNS_HUMAN]                                            | -0,027 | 0,74 | 0,011 | 0,016 |
| Q9Y624-2 | Isoform 2 of Junctional adhesion molecule A OS=Homo sapiens GN=F11R - [JAM1_HUMAN]                                           | -0,027 | 0,50 | 0,018 | 0,009 |
| O00116   | Alkylidihydroxyacetonephosphate synthase, peroxisomal OS=Homo sapiens GN=AGPS PE=1 SV=1 - [ADAS_HUMAN]                       | -0,027 | 0,56 | 0,016 | 0,011 |
| P36897   | TGF-beta receptor type-1 OS=Homo sapiens GN=TGFBR1 PE=1 SV=1 - [TGFR1_HUMAN]                                                 | -0,027 | 0,84 | 0,023 | 0,003 |
| P51606   | N-acylglucosamine 2-epimerase OS=Homo sapiens GN=RENBP PE=1 SV=2 - [RENBP_HUMAN]                                             | -0,027 | 0,48 | 0,018 | 0,009 |

|          |                                                                                                                 |        |      |       |       |
|----------|-----------------------------------------------------------------------------------------------------------------|--------|------|-------|-------|
| P38117   | Electron transfer flavoprotein subunit beta OS=Homo sapiens GN=ETFB PE=1 SV=3 - [ETFB_HUMAN]                    | -0,027 | 0,91 | 0,017 | 0,010 |
| P07339   | Cathepsin D OS=Homo sapiens GN=CTSD PE=1 SV=1 - [CATD_HUMAN]                                                    | -0,027 | 0,62 | 0,019 | 0,008 |
| Q96G03   | Phosphoglucomutase-2 OS=Homo sapiens GN=PGM2 PE=1 SV=4 - [PGM2_HUMAN]                                           | -0,027 | 0,85 | 0,011 | 0,016 |
| P24557-4 | Isoform 4 of Thromboxane-A synthase OS=Homo sapiens GN=TBXAS1 - [THAS_HUMAN]                                    | -0,027 | 0,31 | 0,017 | 0,009 |
| P14314-2 | Isoform 2 of Glucosidase 2 subunit beta OS=Homo sapiens GN=PRKCSH - [GLU2B_HUMAN]                               | -0,026 | 0,81 | 0,017 | 0,009 |
| Q13185   | Chromobox protein homolog 3 OS=Homo sapiens GN=CBX3 PE=1 SV=4 - [CBX3_HUMAN]                                    | -0,026 | 0,79 | 0,025 | 0,001 |
| O95571   | Persulfide dioxygenase ETHE1, mitochondrial OS=Homo sapiens GN=ETHE1 PE=1 SV=2 - [ETHE1_HUMAN]                  | -0,026 | 0,66 | 0,012 | 0,015 |
| P07203   | Glutathione peroxidase 1 OS=Homo sapiens GN=GPX1 PE=1 SV=4 - [GPX1_HUMAN]                                       | -0,026 | 0,64 | 0,012 | 0,014 |
| Q9Y3Z3-4 | Isoform 4 of Deoxynucleoside triphosphate triphosphohydrolase SAMHD1 OS=Homo sapiens GN=SAMHD1 - [SAMH1_HUMAN]  | -0,026 | 0,46 | 0,018 | 0,009 |
| P38919   | Eukaryotic initiation factor 4A-III OS=Homo sapiens GN=EIF4A3 PE=1 SV=4 - [IF4A3_HUMAN]                         | -0,026 | 0,86 | 0,017 | 0,009 |
| P15311   | Ezrin OS=Homo sapiens GN=EZR1 PE=1 SV=4 - [EZRI_HUMAN]                                                          | -0,026 | 0,86 | 0,021 | 0,005 |
| Q9H3U5-2 | Isoform 2 of Major facilitator superfamily domain-containing protein 1 OS=Homo sapiens GN=MFSD1 - [MFSD1_HUMAN] | -0,026 | 0,64 | 0,012 | 0,014 |
| P50225-2 | Isoform 2 of Sulfotransferase 1A1 OS=Homo sapiens GN=SULT1A1 - [ST1A1_HUMAN]                                    | -0,026 | 0,47 | 0,021 | 0,006 |
| Q7Z2Y5-2 | Isoform 2 of Nik-related protein kinase OS=Homo sapiens GN=NRK - [NRK_HUMAN]                                    | -0,026 | 0,59 | 0,011 | 0,015 |
| P35237   | Serpin B6 OS=Homo sapiens GN=SERPINB6 PE=1 SV=3 - [SPB6_HUMAN]                                                  | -0,026 | 0,85 | 0,021 | 0,005 |
| P23786   | Carnitine O-palmitoyltransferase 2, mitochondrial OS=Homo sapiens GN=CPT2 PE=1 SV=2 - [CPT2_HUMAN]              | -0,026 | 0,64 | 0,022 | 0,004 |
| Q5JTZ9   | Alanine--tRNA ligase, mitochondrial OS=Homo sapiens GN=AARS2 PE=1 SV=1 - [SYAM_HUMAN]                           | -0,026 | 0,68 | 0,021 | 0,006 |
| P10253   | Lysosomal alpha-glucosidase OS=Homo sapiens GN=GAA PE=1 SV=4 - [LYAG_HUMAN]                                     | -0,026 | 0,75 | 0,015 | 0,011 |
| P09493-5 | Isoform 5 of Tropomyosin alpha-1 chain OS=Homo sapiens GN=TPM1 - [TPM1_HUMAN]                                   | -0,026 | 0,70 | 0,017 | 0,009 |
| Q12907   | Vesicular integral-membrane protein VIP36 OS=Homo sapiens GN=LMAN2 PE=1 SV=1 - [LMAN2_HUMAN]                    | -0,026 | 0,62 | 0,018 | 0,009 |
| Q6I9Y2   | THO complex subunit 7 homolog OS=Homo sapiens GN=THOC7 PE=1 SV=3 - [THOC7_HUMAN]                                | -0,026 | 0,80 | 0,017 | 0,010 |
| P27487   | Dipeptidyl peptidase 4 OS=Homo sapiens GN=DPP4 PE=1 SV=2 - [DPP4_HUMAN]                                         | -0,026 | 0,29 | 0,018 | 0,008 |
| Q96GD0   | Pyridoxal phosphate phosphatase OS=Homo sapiens GN=PDXP PE=1 SV=2 - [PLPP_HUMAN]                                | -0,026 | 0,90 | 0,023 | 0,004 |
| P22897   | Macrophage mannose receptor 1 OS=Homo sapiens GN=MRC1 PE=1 SV=1 - [MRC1_HUMAN]                                  | -0,026 | 0,64 | 0,015 | 0,011 |
| O75937   | DnaJ homolog subfamily C member 8 OS=Homo sapiens GN=DNAJC8 PE=1 SV=2 - [DNJC8_HUMAN]                           | -0,026 | 0,75 | 0,025 | 0,001 |
| Q5T1M5-2 | Isoform 2 of FK506-binding protein 15 OS=Homo sapiens GN=FKBP15 - [FKB15_HUMAN]                                 | -0,026 | 0,71 | 0,021 | 0,005 |
| O95466   | Formin-like protein 1 OS=Homo sapiens GN=FMNL1 PE=1 SV=3 - [FMNL1_HUMAN]                                        | -0,026 | 0,40 | 0,013 | 0,013 |
| Q16222-2 | Isoform AGX1 of UDP-N-acetylhexosamine pyrophosphorylase OS=Homo sapiens GN=UAP1 - [UAP1_HUMAN]                 | -0,026 | 0,79 | 0,018 | 0,009 |
| Q9UBR2   | Cathepsin Z OS=Homo sapiens GN=CTSZ PE=1 SV=1 - [CATZ_HUMAN]                                                    | -0,026 | 0,65 | 0,023 | 0,003 |
| P46060   | Ran GTPase-activating protein 1 OS=Homo sapiens GN=RANGAP1 PE=1 SV=1 - [RAGP1_HUMAN]                            | -0,026 | 0,81 | 0,016 | 0,010 |
| P14317   | Hematopoietic lineage cell-specific protein OS=Homo sapiens GN=HCLS1 PE=1 SV=3 - [HCLS1_HUMAN]                  | -0,026 | 0,51 | 0,016 | 0,010 |
| P55884   | Eukaryotic translation initiation factor 3 subunit B OS=Homo sapiens GN=EIF3B PE=1 SV=3 - [EIF3B_HUMAN]         | -0,026 | 0,83 | 0,022 | 0,004 |



|          |                                                                                                                       |        |      |       |       |
|----------|-----------------------------------------------------------------------------------------------------------------------|--------|------|-------|-------|
| P09651-3 | Isoform 2 of Heterogeneous nuclear ribonucleoprotein A1 OS=Homo sapiens GN=HNRNPA1 - [ROA1_HUMAN]                     | -0,026 | 0,81 | 0,017 | 0,009 |
| P17844-2 | Isoform 2 of Probable ATP-dependent RNA helicase DDX5 OS=Homo sapiens GN=DDX5 - [DDX5_HUMAN]                          | -0,026 | 0,78 | 0,016 | 0,010 |
| Q9UHX1-4 | Isoform 4 of Poly(U)-binding-splicing factor PUF60 OS=Homo sapiens GN=PUF60 - [PUF60_HUMAN]                           | -0,026 | 0,73 | 0,021 | 0,005 |
| Q9HDC9-2 | Isoform 2 of Adipocyte plasma membrane-associated protein OS=Homo sapiens GN=APMAP - [APMAP_HUMAN]                    | -0,026 | 0,77 | 0,020 | 0,006 |
| Q96T51   | RUN and FYVE domain-containing protein 1 OS=Homo sapiens GN=RUFY1 PE=1 SV=2 - [RUFY1_HUMAN]                           | -0,026 | 0,78 | 0,016 | 0,010 |
| P16284-3 | Isoform Delta13 of Platelet endothelial cell adhesion molecule OS=Homo sapiens GN=PECAM1 - [PECA1_HUMAN]              | -0,026 | 0,56 | 0,022 | 0,004 |
| O95202   | LETM1 and EF-hand domain-containing protein 1, mitochondrial OS=Homo sapiens GN=LETM1 PE=1 SV=1 - [LETM1_HUMAN]       | -0,026 | 0,79 | 0,019 | 0,007 |
| P28838-2 | Isoform 2 of Cytosol aminopeptidase OS=Homo sapiens GN=LAP3 - [AMPL_HUMAN]                                            | -0,026 | 0,64 | 0,013 | 0,013 |
| P25774-2 | Isoform 2 of Cathepsin S OS=Homo sapiens GN=CTSS - [CATS_HUMAN]                                                       | -0,026 | 0,17 | 0,020 | 0,006 |
| P49792   | E3 SUMO-protein ligase RanBP2 OS=Homo sapiens GN=RANBP2 PE=1 SV=2 - [RBP2_HUMAN]                                      | -0,026 | 0,80 | 0,024 | 0,002 |
| Q8IZ83-3 | Isoform 3 of Aldehyde dehydrogenase family 16 member A1 OS=Homo sapiens GN=ALDH16A1 - [A16A1_HUMAN]                   | -0,026 | 0,76 | 0,025 | 0,001 |
| P34897-3 | Isoform 3 of Serine hydroxymethyltransferase, mitochondrial OS=Homo sapiens GN=SHMT2 - [GLYM_HUMAN]                   | -0,026 | 0,61 | 0,014 | 0,012 |
| P62995-3 | Isoform 3 of Transformer-2 protein homolog beta OS=Homo sapiens GN=TRA2B - [TRA2B_HUMAN]                              | -0,026 | 0,81 | 0,013 | 0,013 |
| Q32P28-4 | Isoform 4 of Prolyl 3-hydroxylase 1 OS=Homo sapiens GN=P3H1 - [P3H1_HUMAN]                                            | -0,026 | 0,79 | 0,017 | 0,009 |
| Q96TA1-2 | Isoform 2 of Niban-like protein 1 OS=Homo sapiens GN=FAM129B - [NIBL1_HUMAN]                                          | -0,026 | 0,75 | 0,014 | 0,011 |
| Q86UX7-2 | Isoform 2 of Fermitin family homolog 3 OS=Homo sapiens GN=FERMT3 - [URP2_HUMAN]                                       | -0,026 | 0,32 | 0,014 | 0,011 |
| O60664-4 | Isoform 4 of Perilipin-3 OS=Homo sapiens GN=PLIN3 - [PLIN3_HUMAN]                                                     | -0,026 | 0,84 | 0,018 | 0,008 |
| Q12965   | Unconventional myosin-1e OS=Homo sapiens GN=MYO1E PE=1 SV=2 - [MYO1E_HUMAN]                                           | -0,026 | 0,83 | 0,017 | 0,008 |
| P50897-2 | Isoform 2 of Palmitoyl-protein thioesterase 1 OS=Homo sapiens GN=PPT1 - [PPT1_HUMAN]                                  | -0,025 | 0,79 | 0,018 | 0,008 |
| P07686   | Beta-hexosaminidase subunit beta OS=Homo sapiens GN=HEXB PE=1 SV=3 - [HEXB_HUMAN]                                     | -0,025 | 0,65 | 0,018 | 0,008 |
| P20839-2 | Isoform 2 of Inosine-5'-monophosphate dehydrogenase 1 OS=Homo sapiens GN=IMPDH1 - [IMDH1_HUMAN]                       | -0,025 | 0,65 | 0,013 | 0,012 |
| P13667   | Protein disulfide-isomerase A4 OS=Homo sapiens GN=PDIA4 PE=1 SV=2 - [PDIA4_HUMAN]                                     | -0,025 | 0,80 | 0,009 | 0,016 |
| Q96199   | Succinyl-CoA ligase [GDP-forming] subunit beta, mitochondrial OS=Homo sapiens GN=SUCLG2 PE=1 SV=2 - [SUCB2_HUMAN]     | -0,025 | 0,76 | 0,022 | 0,003 |
| P05496   | ATP synthase F(0) complex subunit C1, mitochondrial OS=Homo sapiens GN=ATP5G1 PE=1 SV=2 - [AT5G1_HUMAN]               | -0,025 | 0,86 | 0,020 | 0,006 |
| O14672   | Disintegrin and metalloproteinase domain-containing protein 10 OS=Homo sapiens GN=ADAM10 PE=1 SV=1 - [ADA10_HUMAN]    | -0,025 | 0,47 | 0,014 | 0,011 |
| O75348   | V-type proton ATPase subunit G 1 OS=Homo sapiens GN=ATP6V1G1 PE=1 SV=3 - [VATG1_HUMAN]                                | -0,025 | 0,77 | 0,014 | 0,011 |
| P49748-2 | Isoform 2 of Very long-chain specific acyl-CoA dehydrogenase, mitochondrial OS=Homo sapiens GN=ACADVL - [ACADV_HUMAN] | -0,025 | 0,82 | 0,016 | 0,009 |
| O43143   | Pre-mRNA-splicing factor ATP-dependent RNA helicase DHX15 OS=Homo sapiens GN=DHX15 PE=1 SV=2 - [DHX15_HUMAN]          | -0,025 | 0,95 | 0,022 | 0,003 |
| P29350   | Tyrosine-protein phosphatase non-receptor type 6 OS=Homo sapiens GN=PTPN6 PE=1 SV=1 -                                 | -0,025 | 0,28 | 0,016 | 0,009 |

|          |                                                                                                                             |        |      |       |       |
|----------|-----------------------------------------------------------------------------------------------------------------------------|--------|------|-------|-------|
|          | [PTN6_HUMAN]                                                                                                                |        |      |       |       |
| Q13107-2 | Isoform 2 of Ubiquitin carboxyl-terminal hydrolase 4 OS=Homo sapiens GN=USP4 - [UBP4_HUMAN]                                 | -0,025 | 0,83 | 0,015 | 0,010 |
| Q8NHP6   | Motile sperm domain-containing protein 2 OS=Homo sapiens GN=MOSPD2 PE=1 SV=1 - [MSPD2_HUMAN]                                | -0,025 | 0,86 | 0,024 | 0,001 |
| O94906-2 | Isoform 2 of Pre-mRNA-processing factor 6 OS=Homo sapiens GN=PRPF6 - [PRP6_HUMAN]                                           | -0,025 | 0,86 | 0,025 | 0,001 |
| P23508   | Colorectal mutant cancer protein OS=Homo sapiens GN=MCC PE=1 SV=2 - [CRCM_HUMAN]                                            | -0,025 | 0,83 | 0,020 | 0,005 |
| Q8NBQ5   | Estradiol 17-beta-dehydrogenase 11 OS=Homo sapiens GN=HSD17B11 PE=1 SV=3 - [DHB11_HUMAN]                                    | -0,025 | 0,48 | 0,022 | 0,003 |
| Q96CW1-2 | Isoform 2 of AP-2 complex subunit mu OS=Homo sapiens GN=AP2M1 - [AP2M1_HUMAN]                                               | -0,025 | 0,86 | 0,024 | 0,001 |
| Q96RQ3   | Methylcrotonoyl-CoA carboxylase subunit alpha, mitochondrial OS=Homo sapiens GN=MCCC1 PE=1 SV=3 - [MCCA_HUMAN]              | -0,025 | 0,84 | 0,019 | 0,006 |
| Q8TD55-2 | Isoform 2 of Pleckstrin homology domain-containing family O member 2 OS=Homo sapiens GN=PLEKHO2 - [PKHO2_HUMAN]             | -0,025 | 0,67 | 0,013 | 0,012 |
| P54819-6 | Isoform 6 of Adenylate kinase 2, mitochondrial OS=Homo sapiens GN=AK2 - [KAD2_HUMAN]                                        | -0,025 | 0,69 | 0,018 | 0,007 |
| P60842   | Eukaryotic initiation factor 4A-I OS=Homo sapiens GN=EIF4A1 PE=1 SV=1 - [IF4A1_HUMAN]                                       | -0,025 | 0,77 | 0,016 | 0,009 |
| P02786   | Transferrin receptor protein 1 OS=Homo sapiens GN=TFRC PE=1 SV=2 - [TFR1_HUMAN]                                             | -0,025 | 0,57 | 0,020 | 0,005 |
| P11021   | 78 kDa glucose-regulated protein OS=Homo sapiens GN=HSPA5 PE=1 SV=2 - [GRP78_HUMAN]                                         | -0,025 | 0,87 | 0,015 | 0,010 |
| Q9BS26   | Endoplasmic reticulum resident protein 44 OS=Homo sapiens GN=ERP44 PE=1 SV=1 - [ERP44_HUMAN]                                | -0,025 | 0,70 | 0,012 | 0,013 |
| Q92615   | La-related protein 4B OS=Homo sapiens GN=LARP4B PE=1 SV=3 - [LAR4B_HUMAN]                                                   | -0,025 | 0,71 | 0,023 | 0,002 |
| Q9Y4E1-3 | Isoform 3 of WASH complex subunit FAM21C OS=Homo sapiens GN=FAM21C - [FA21C_HUMAN]                                          | -0,025 | 0,83 | 0,023 | 0,001 |
| P26641   | Elongation factor 1-gamma OS=Homo sapiens GN=EEF1G PE=1 SV=3 - [EF1G_HUMAN]                                                 | -0,025 | 0,77 | 0,024 | 0,001 |
| P14598-2 | Isoform 2 of Neutrophil cytosol factor 1 OS=Homo sapiens GN=NCF1 - [NCF1_HUMAN]                                             | -0,025 | 0,45 | 0,012 | 0,012 |
| Q63HN8   | E3 ubiquitin-protein ligase RNF213 OS=Homo sapiens GN=RNF213 PE=1 SV=3 - [RN213_HUMAN]                                      | -0,025 | 0,73 | 0,015 | 0,010 |
| P01903   | HLA class II histocompatibility antigen, DR alpha chain OS=Homo sapiens GN=HLA-DRA PE=1 SV=1 - [DRA_HUMAN]                  | -0,025 | 0,39 | 0,011 | 0,013 |
| P22681   | E3 ubiquitin-protein ligase CBL OS=Homo sapiens GN=CBL PE=1 SV=2 - [CBL_HUMAN]                                              | -0,025 | 0,81 | 0,018 | 0,006 |
| O43837   | Isocitrate dehydrogenase [NAD] subunit beta, mitochondrial OS=Homo sapiens GN=IDH3B PE=1 SV=2 - [IDH3B_HUMAN]               | -0,025 | 0,83 | 0,016 | 0,009 |
| Q9UHD8-7 | Isoform 7 of Septin-9 OS=Homo sapiens GN=SEPT9 - [SEPT9_HUMAN]                                                              | -0,025 | 0,84 | 0,016 | 0,009 |
| Q6NYC8   | Phostensin OS=Homo sapiens GN=PPP1R18 PE=1 SV=1 - [PPR18_HUMAN]                                                             | -0,025 | 0,80 | 0,014 | 0,011 |
| Q53GL7   | Poly [ADP-ribose] polymerase 10 OS=Homo sapiens GN=PARP10 PE=1 SV=2 - [PAR10_HUMAN]                                         | -0,024 | 0,79 | 0,015 | 0,009 |
| P48735-2 | Isoform 2 of Isocitrate dehydrogenase [NADP], mitochondrial OS=Homo sapiens GN=IDH2 - [IDHP_HUMAN]                          | -0,024 | 0,66 | 0,017 | 0,007 |
| P49354   | Protein farnesyltransferase/geranylgeranyltransferase type-1 subunit alpha OS=Homo sapiens GN=FNTA PE=1 SV=1 - [FNTA_HUMAN] | -0,024 | 0,86 | 0,020 | 0,004 |
| Q9BZF1-3 | Isoform 3 of Oxysterol-binding protein-related protein 8 OS=Homo sapiens GN=OSBPL8 - [OSBL8_HUMAN]                          | -0,024 | 0,70 | 0,018 | 0,007 |
| Q8NBJ5   | Procollagen galactosyltransferase 1 OS=Homo sapiens GN=COLGALT1 PE=1 SV=1 - [GT251_HUMAN]                                   | -0,024 | 0,64 | 0,013 | 0,011 |
| Q71RC2-7 | Isoform 7 of La-related protein 4 OS=Homo sapiens GN=LARP4 - [LARP4_HUMAN]                                                  | -0,024 | 0,78 | 0,019 | 0,004 |
| Q27J81-2 | Isoform 2 of Inverted formin-2 OS=Homo sapiens GN=INF2 - [INF2_HUMAN]                                                       | -0,024 | 0,86 | 0,022 | 0,002 |
| Q96NY7-2 | Isoform A of Chloride intracellular channel protein 6 OS=Homo sapiens GN=CLIC6 - [CLIC6_HUMAN]                              | -0,024 | 0,56 | 0,014 | 0,009 |

|          |                                                                                                                     |        |      |       |       |
|----------|---------------------------------------------------------------------------------------------------------------------|--------|------|-------|-------|
| Q9Y2Q3-4 | Isoform 4 of Glutathione S-transferase kappa 1 OS=Homo sapiens GN=GSTK1 - [GSTK1_HUMAN]                             | -0,024 | 0,52 | 0,021 | 0,003 |
| P42331-2 | Isoform 2 of Rho GTPase-activating protein 25 OS=Homo sapiens GN=ARHGAP25 - [RHG25_HUMAN]                           | -0,024 | 0,40 | 0,020 | 0,004 |
| P22307-6 | Isoform 6 of Non-specific lipid-transfer protein OS=Homo sapiens GN=SCP2 - [NLTP_HUMAN]                             | -0,024 | 0,66 | 0,022 | 0,002 |
| Q9NR45   | Sialic acid synthase OS=Homo sapiens GN=NANS PE=1 SV=2 - [SIAS_HUMAN]                                               | -0,024 | 0,69 | 0,021 | 0,003 |
| P36551   | Oxygen-dependent coproporphyrinogen-III oxidase, mitochondrial OS=Homo sapiens GN=CPOX PE=1 SV=3 - [HEM6_HUMAN]     | -0,024 | 0,70 | 0,018 | 0,005 |
| Q96JC1-2 | Isoform 2 of Vam6/Vps39-like protein OS=Homo sapiens GN=VPS39 - [VPS39_HUMAN]                                       | -0,024 | 0,83 | 0,022 | 0,001 |
| P61158   | Actin-related protein 3 OS=Homo sapiens GN=ACTR3 PE=1 SV=3 - [ARP3_HUMAN]                                           | -0,024 | 0,93 | 0,017 | 0,007 |
| Q9BWM7   | Sideroflexin-3 OS=Homo sapiens GN=SFXN3 PE=1 SV=2 - [SFXN3_HUMAN]                                                   | -0,024 | 0,88 | 0,015 | 0,009 |
| P53634   | Dipeptidyl peptidase 1 OS=Homo sapiens GN=CTSC PE=1 SV=2 - [CATC_HUMAN]                                             | -0,024 | 0,48 | 0,016 | 0,007 |
| P52735-3 | Isoform 3 of Guanine nucleotide exchange factor VAV2 OS=Homo sapiens GN=VAV2 - [VAV2_HUMAN]                         | -0,024 | 0,80 | 0,016 | 0,008 |
| P14625   | Endoplasmin OS=Homo sapiens GN=HSP90B1 PE=1 SV=1 - [ENPL_HUMAN]                                                     | -0,023 | 0,89 | 0,016 | 0,007 |
| P14780   | Matrix metalloproteinase-9 OS=Homo sapiens GN=MMP9 PE=1 SV=3 - [MMP9_HUMAN]                                         | -0,023 | 0,39 | 0,017 | 0,006 |
| P98175-2 | Isoform 2 of RNA-binding protein 10 OS=Homo sapiens GN=RBM10 - [RBM10_HUMAN]                                        | -0,023 | 0,88 | 0,018 | 0,005 |
| P61916-2 | Isoform 2 of Epididymal secretory protein E1 OS=Homo sapiens GN=NPC2 - [NPC2_HUMAN]                                 | -0,023 | 0,46 | 0,018 | 0,005 |
| P36894   | Bone morphogenetic protein receptor type-1A OS=Homo sapiens GN=BMPR1A PE=1 SV=2 - [BMR1A_HUMAN]                     | -0,023 | 0,78 | 0,023 | 0,000 |
| Q72222-2 | Isoform 2 of Elongation factor Tu GTP-binding domain-containing protein 1 OS=Homo sapiens GN=EFTUD1 - [ETUD1_HUMAN] | -0,023 | 0,58 | 0,023 | 0,000 |
| Q9NYF8-3 | Isoform 3 of Bcl-2-associated transcription factor 1 OS=Homo sapiens GN=BCLAF1 - [BCLF1_HUMAN]                      | -0,023 | 0,89 | 0,022 | 0,001 |
| P20592   | Interferon-induced GTP-binding protein Mx2 OS=Homo sapiens GN=MX2 PE=1 SV=1 - [MX2_HUMAN]                           | -0,023 | 0,44 | 0,023 | 0,001 |
| P07996   | Thrombospondin-1 OS=Homo sapiens GN=THBS1 PE=1 SV=2 - [TSP1_HUMAN]                                                  | -0,023 | 0,42 | 0,015 | 0,008 |
| Q9UNK0   | Syntaxin-8 OS=Homo sapiens GN=STX8 PE=1 SV=2 - [STX8_HUMAN]                                                         | -0,023 | 0,87 | 0,016 | 0,007 |
| Q8N392-2 | Isoform 2 of Rho GTPase-activating protein 18 OS=Homo sapiens GN=ARHGAP18 - [RHG18_HUMAN]                           | -0,023 | 0,73 | 0,021 | 0,002 |
| Q96FS4   | Signal-induced proliferation-associated protein 1 OS=Homo sapiens GN=SIPA1 PE=1 SV=1 - [SIPA1_HUMAN]                | -0,023 | 0,64 | 0,016 | 0,007 |
| P32969   | 60S ribosomal protein L9 OS=Homo sapiens GN=RPL9 PE=1 SV=1 - [RL9_HUMAN]                                            | -0,023 | 0,88 | 0,020 | 0,004 |
| O15321-2 | Isoform 2 of Transmembrane 9 superfamily member 1 OS=Homo sapiens GN=TM9SF1 - [TM9S1_HUMAN]                         | -0,023 | 0,77 | 0,017 | 0,006 |
| O60568   | Procollagen-lysine,2-oxoglutarate 5-dioxygenase 3 OS=Homo sapiens GN=PLOD3 PE=1 SV=1 - [PLOD3_HUMAN]                | -0,023 | 0,72 | 0,017 | 0,005 |
| P22105   | Tenascin-X OS=Homo sapiens GN=TNXB PE=1 SV=4 - [TENX_HUMAN]                                                         | -0,023 | 0,71 | 0,021 | 0,002 |
| Q96HE7   | ERO1-like protein alpha OS=Homo sapiens GN=ERO1A PE=1 SV=2 - [ERO1A_HUMAN]                                          | -0,023 | 0,73 | 0,017 | 0,006 |
| Q96C86   | m7GpppX diphosphatase OS=Homo sapiens GN=DCPS PE=1 SV=2 - [DCPS_HUMAN]                                              | -0,023 | 0,86 | 0,020 | 0,002 |
| Q9UNL2   | Translocon-associated protein subunit gamma OS=Homo sapiens GN=SSR3 PE=1 SV=1 - [SSRG_HUMAN]                        | -0,023 | 0,74 | 0,016 | 0,007 |
| O43252   | Bifunctional 3'-phosphoadenosine 5'-phosphosulfate synthase 1 OS=Homo sapiens GN=PAPSS1 PE=1 SV=2 - [PAPS1_HUMAN]   | -0,023 | 0,75 | 0,019 | 0,004 |
| P40939   | Trifunctional enzyme subunit alpha, mitochondrial OS=Homo sapiens GN=HADHA PE=1 SV=2 - [ECHA_HUMAN]                 | -0,023 | 0,89 | 0,020 | 0,003 |

|          |                                                                                                                       |        |      |       |       |
|----------|-----------------------------------------------------------------------------------------------------------------------|--------|------|-------|-------|
| Q13765   | Nascent polypeptide-associated complex subunit alpha OS=Homo sapiens GN=NACA PE=1 SV=1 - [NACA_HUMAN]                 | -0,023 | 0,88 | 0,017 | 0,006 |
| Q43491   | Band 4.1-like protein 2 OS=Homo sapiens GN=EPB41L2 PE=1 SV=1 - [E41L2_HUMAN]                                          | -0,023 | 0,91 | 0,022 | 0,000 |
| O15127   | Secretory carrier-associated membrane protein 2 OS=Homo sapiens GN=SCAMP2 PE=1 SV=2 - [SCAM2_HUMAN]                   | -0,022 | 0,74 | 0,014 | 0,008 |
| Q15084-3 | Isoform 3 of Protein disulfide-isomerase A6 OS=Homo sapiens GN=PDIA6 - [PDIA6_HUMAN]                                  | -0,022 | 0,71 | 0,018 | 0,005 |
| O00469-3 | Isoform 3 of Procollagen-lysine,2-oxoglutarate 5-dioxygenase 2 OS=Homo sapiens GN=PLOD2 - [PLOD2_HUMAN]               | -0,022 | 0,60 | 0,014 | 0,008 |
| P15144   | Aminopeptidase N OS=Homo sapiens GN=ANPEP PE=1 SV=4 - [AMPN_HUMAN]                                                    | -0,022 | 0,40 | 0,019 | 0,004 |
| Q9NZ08   | Endoplasmic reticulum aminopeptidase 1 OS=Homo sapiens GN=ERAP1 PE=1 SV=3 - [ERAP1_HUMAN]                             | -0,022 | 0,77 | 0,019 | 0,003 |
| Q04837   | Single-stranded DNA-binding protein, mitochondrial OS=Homo sapiens GN=SSBP1 PE=1 SV=1 - [SSBP_HUMAN]                  | -0,022 | 0,84 | 0,020 | 0,003 |
| Q15643   | Thyroid receptor-interacting protein 11 OS=Homo sapiens GN=TRIP11 PE=1 SV=3 - [TRIPB_HUMAN]                           | -0,022 | 0,88 | 0,016 | 0,006 |
| Q92508   | Piezo-type mechanosensitive ion channel component 1 OS=Homo sapiens GN=PIEZO1 PE=1 SV=4 - [PIEZ1_HUMAN]               | -0,022 | 0,84 | 0,009 | 0,013 |
| Q8N131-2 | Isoform 2 of Porimin OS=Homo sapiens GN=TMEM123 - [PORIM_HUMAN]                                                       | -0,022 | 0,75 | 0,020 | 0,002 |
| Q96C36   | Pyrraline-5-carboxylate reductase 2 OS=Homo sapiens GN=PYCR2 PE=1 SV=1 - [P5CR2_HUMAN]                                | -0,022 | 0,76 | 0,016 | 0,006 |
| P50851-2 | Isoform 2 of Lipopolysaccharide-responsive and beige-like anchor protein OS=Homo sapiens GN=LRBA - [LRBA_HUMAN]       | -0,022 | 0,90 | 0,016 | 0,005 |
| Q15149   | Plectin OS=Homo sapiens GN=PLEC PE=1 SV=3 - [PLEC_HUMAN]                                                              | -0,022 | 0,84 | 0,021 | 0,000 |
| P50453   | Serpin B9 OS=Homo sapiens GN=SERPINB9 PE=1 SV=1 - [SPB9_HUMAN]                                                        | -0,022 | 0,73 | 0,018 | 0,004 |
| O95340   | Bifunctional 3'-phosphoadenosine 5'-phosphosulfate synthase 2 OS=Homo sapiens GN=PAPSS2 PE=1 SV=2 - [PAPS2_HUMAN]     | -0,022 | 0,77 | 0,016 | 0,005 |
| P00491   | Purine nucleoside phosphorylase OS=Homo sapiens GN=PNP PE=1 SV=2 - [PNPH_HUMAN]                                       | -0,022 | 0,68 | 0,017 | 0,004 |
| Q16363-2 | Isoform 2 of Laminin subunit alpha-4 OS=Homo sapiens GN=LAMA4 - [LAMA4_HUMAN]                                         | -0,021 | 0,59 | 0,016 | 0,005 |
| P01877   | Ig alpha-2 chain C region OS=Homo sapiens GN=IGHA2 PE=1 SV=3 - [IGHA2_HUMAN]                                          | -0,021 | 0,69 | 0,019 | 0,002 |
| Q9NP77-2 | Isoform 2 of RNA polymerase II subunit A C-terminal domain phosphatase SSU72 OS=Homo sapiens GN=SSU72 - [SSU72_HUMAN] | -0,021 | 0,89 | 0,019 | 0,002 |
| Q9HC35-2 | Isoform 2 of Echinoderm microtubule-associated protein-like 4 OS=Homo sapiens GN=EML4 - [EMAL4_HUMAN]                 | -0,021 | 0,79 | 0,019 | 0,002 |
| Q9Y2X3   | Nucleolar protein 58 OS=Homo sapiens GN=NOP58 PE=1 SV=1 - [NOP58_HUMAN]                                               | -0,021 | 0,82 | 0,020 | 0,000 |
| P52888   | Thimet oligopeptidase OS=Homo sapiens GN=THOP1 PE=1 SV=2 - [THOP1_HUMAN]                                              | -0,021 | 0,94 | 0,014 | 0,006 |
| P14618   | Pyruvate kinase PKM OS=Homo sapiens GN=PKM PE=1 SV=4 - [KPYM_HUMAN]                                                   | -0,021 | 0,87 | 0,016 | 0,005 |
| Q9NTX5-3 | Isoform 3 of Ethylmalonyl-CoA decarboxylase OS=Homo sapiens GN=ECHDC1 - [ECHD1_HUMAN]                                 | -0,021 | 0,86 | 0,013 | 0,007 |
| O60462-4 | Isoform B0 of Neuropilin-2 OS=Homo sapiens GN=NRP2 - [NRP2_HUMAN]                                                     | -0,020 | 0,63 | 0,019 | 0,001 |
| P36222   | Chitinase-3-like protein 1 OS=Homo sapiens GN=CHI3L1 PE=1 SV=2 - [CH3L1_HUMAN]                                        | -0,020 | 0,45 | 0,018 | 0,002 |
| P50452   | Serpin B8 OS=Homo sapiens GN=SERPINB8 PE=1 SV=2 - [SPB8_HUMAN]                                                        | -0,020 | 0,78 | 0,017 | 0,003 |
| P24821   | Tenascin OS=Homo sapiens GN=TNC PE=1 SV=3 - [TENA_HUMAN]                                                              | -0,020 | 0,37 | 0,013 | 0,007 |
| Q6PJW8-2 | Isoform 2 of Consortin OS=Homo sapiens GN=CNST - [CNST_HUMAN]                                                         | -0,020 | 0,89 | 0,019 | 0,001 |
| Q6IA69-2 | Isoform 2 of Glutamine-dependent NAD(+) synthetase OS=Homo sapiens GN=NADSYN1 - [NADE_HUMAN]                          | -0,020 | 0,77 | 0,016 | 0,004 |

|           |                                                                                                                  |        |      |       |       |
|-----------|------------------------------------------------------------------------------------------------------------------|--------|------|-------|-------|
| Q32MZ4-3  | Isoform 3 of Leucine-rich repeat flightless-interacting protein 1 OS=Homo sapiens GN=LRRFIP1 - [LRRF1_HUMAN]     | -0,020 | 0,83 | 0,019 | 0,001 |
| Q9HCH5-15 | Isoform 12 of Synaptotagmin-like protein 2 OS=Homo sapiens GN=SYTL2 - [SYTL2_HUMAN]                              | -0,020 | 0,75 | 0,016 | 0,004 |
| P38606-2  | Isoform 2 of V-type proton ATPase catalytic subunit A OS=Homo sapiens GN=ATP6V1A - [VATA_HUMAN]                  | -0,020 | 0,84 | 0,019 | 0,001 |
| Q5VW36    | Focadhesin OS=Homo sapiens GN=FOCAD PE=1 SV=1 - [FOCAD_HUMAN]                                                    | -0,020 | 0,88 | 0,017 | 0,003 |
| P55209-3  | Isoform 3 of Nucleosome assembly protein 1-like 1 OS=Homo sapiens GN=NAP1L1 - [NP1L1_HUMAN]                      | -0,020 | 0,85 | 0,017 | 0,003 |
| O14786    | Neuropilin-1 OS=Homo sapiens GN=NRP1 PE=1 SV=3 - [NRP1_HUMAN]                                                    | -0,020 | 0,76 | 0,017 | 0,003 |
| P35442    | Thrombospondin-2 OS=Homo sapiens GN=THBS2 PE=1 SV=2 - [TSP2_HUMAN]                                               | -0,020 | 0,62 | 0,018 | 0,002 |
| Q14571    | Inositol 1,4,5-trisphosphate receptor type 2 OS=Homo sapiens GN=ITPR2 PE=1 SV=2 - [ITPR2_HUMAN]                  | -0,019 | 0,76 | 0,019 | 0,000 |
| P11310    | Medium-chain specific acyl-CoA dehydrogenase, mitochondrial OS=Homo sapiens GN=ACADM PE=1 SV=1 - [ACADM_HUMAN]   | -0,019 | 0,77 | 0,019 | 0,000 |
| P23381    | Tryptophan--tRNA ligase, cytoplasmic OS=Homo sapiens GN=WARS PE=1 SV=2 - [SYWC_HUMAN]                            | -0,019 | 0,85 | 0,017 | 0,002 |
| P41226    | Ubiquitin-like modifier-activating enzyme 7 OS=Homo sapiens GN=UBA7 PE=1 SV=2 - [UBA7_HUMAN]                     | -0,019 | 0,85 | 0,017 | 0,002 |
| Q9NR99    | Matrix-remodeling-associated protein 5 OS=Homo sapiens GN=MXRA5 PE=2 SV=3 - [MXRA5_HUMAN]                        | -0,019 | 0,56 | 0,017 | 0,002 |
| Q9NZT2-2  | Isoform 2 of Opioid growth factor receptor OS=Homo sapiens GN=OGFR - [OGFR_HUMAN]                                | -0,019 | 0,81 | 0,018 | 0,001 |
| P27797    | Calreticulin OS=Homo sapiens GN=CALR PE=1 SV=1 - [CALR_HUMAN]                                                    | -0,019 | 0,86 | 0,012 | 0,007 |
| P05164    | Myeloperoxidase OS=Homo sapiens GN=MPO PE=1 SV=1 - [PERM_HUMAN]                                                  | -0,019 | 0,52 | 0,018 | 0,001 |
| P17301    | Integrin alpha-2 OS=Homo sapiens GN=ITGA2 PE=1 SV=1 - [ITA2_HUMAN]                                               | -0,019 | 0,80 | 0,017 | 0,001 |
| P61604    | 10 kDa heat shock protein, mitochondrial OS=Homo sapiens GN=HSPE1 PE=1 SV=2 - [CH10_HUMAN]                       | -0,018 | 0,80 | 0,016 | 0,003 |
| P21796    | Voltage-dependent anion-selective channel protein 1 OS=Homo sapiens GN=VDAC1 PE=1 SV=2 - [VDAC1_HUMAN]           | -0,018 | 0,78 | 0,018 | 0,000 |
| P10619-2  | Isoform 2 of Lysosomal protective protein OS=Homo sapiens GN=CTSA - [PPGB_HUMAN]                                 | -0,018 | 0,70 | 0,015 | 0,003 |
| Q70UQ0    | Inhibitor of nuclear factor kappa-B kinase-interacting protein OS=Homo sapiens GN=IKBIP PE=1 SV=1 - [IKIP_HUMAN] | -0,018 | 0,70 | 0,017 | 0,001 |
| P07237    | Protein disulfide-isomerase OS=Homo sapiens GN=P4HB PE=1 SV=3 - [PDIA1_HUMAN]                                    | -0,017 | 0,90 | 0,011 | 0,006 |
| P40926    | Malate dehydrogenase, mitochondrial OS=Homo sapiens GN=MDH2 PE=1 SV=3 - [MDHM_HUMAN]                             | -0,017 | 0,84 | 0,017 | 0,000 |
| Q13162    | Peroxiredoxin-4 OS=Homo sapiens GN=PRDX4 PE=1 SV=1 - [PRDX4_HUMAN]                                               | -0,016 | 0,82 | 0,016 | 0,000 |
| P30040    | Endoplasmic reticulum resident protein 29 OS=Homo sapiens GN=ERP29 PE=1 SV=4 - [ERP29_HUMAN]                     | -0,016 | 0,87 | 0,012 | 0,004 |

**Supplementary Table 5a.** KEGG pathway analysis of proteins differentially expressed between BAV-ND and TAV-ND aorta (n=276).

| KEGG Gene Set Name                          | Description                                 | FDR q    | Ref              |
|---------------------------------------------|---------------------------------------------|----------|------------------|
| ENDOCYTOSIS                                 | Endocytosis                                 | 2.27E-12 | <sup>14</sup>    |
| COMPLEMENT AND COAGULATION CASCADES         | Complement and coagulation cascades         | 6.92E-10 | <sup>15</sup>    |
| VALINE LEUCINE AND ISOLEUCINE DEGRADATION   | Valine, leucine and isoleucine degradation  | 1.16E-5  | <sup>16</sup>    |
| FOCAL ADHESION                              | Focal adhesion                              | 1.25E-5  | <sup>17</sup>    |
| CITRATE CYCLE TCA CYCLE                     | Citrate cycle (TCA cycle)                   | 3.76E-5  | <sup>18</sup>    |
| AMINO SUGAR AND NUCLEOTIDE SUGAR METABOLISM | Amino sugar and nucleotide sugar metabolism | 1.6E-4   | <sup>19</sup>    |
| ECM RECEPTOR INTERACTION                    | ECM-receptor interaction                    | 2.36E-4  | <sup>20</sup>    |
| PATHWAYS IN CANCER                          | Pathways in cancer                          | 4.88E-4  |                  |
| GLYCOLYSIS GLUCONEOGENESIS                  | Glycolysis / Gluconeogenesis                | 5.84E-4  | <sup>21</sup>    |
| ALANINE ASPARTATE AND GLUTAMATE METABOLISM  | Alanine, aspartate and glutamate metabolism | 6.00E-04 | <sup>21,22</sup> |

**Supplementary Table 5b.** Hallmark analysis of proteins differentially expressed between BAV-ND and TAV-ND aorta (n=276).

| Hallmark Gene Set Name            | Description                                                                                    | FDR q   | Ref           |
|-----------------------------------|------------------------------------------------------------------------------------------------|---------|---------------|
| OXIDATIVE PHOSPHORYLATION         | Genes encoding proteins involved in oxidative phosphorylation.                                 | 8.16E-9 | <sup>23</sup> |
| COAGULATION                       | Genes encoding components of blood coagulation system; also up-regulated in platelets.         | 1.22E-8 | <sup>24</sup> |
| EPITHELIAL MESENCHYMAL TRANSITION | Genes defining EMT, as in wound healing, fibrosis and metastasis.                              | 4.27E-6 |               |
| COMPLEMENT                        | Genes encoding components of the complement system, which is part of the innate immune system. | 2.45E-5 | <sup>15</sup> |
| HYPOXIA                           | Genes up-regulated in response to low oxygen levels (hypoxia).                                 | 2.45E-5 | <sup>25</sup> |
| FATTY ACID METABOLISM             | Genes encoding proteins involved in metabolism of fatty acids.                                 | 3.08E-5 | <sup>21</sup> |
| APOPTOSIS                         | Genes mediating programmed cell death (apoptosis) by activation of caspases.                   | 3.08E-5 | <sup>26</sup> |
| ADIPOGENESIS                      | Genes up-regulated during adipocyte differentiation (adipogenesis).                            | 1.05E-4 | <sup>27</sup> |
| ALLOGRAFT REJECTION               | Genes up-regulated during transplant rejection.                                                | 1.05E-4 |               |
| GLYCOLYSIS                        | Genes encoding proteins involved in glycolysis and gluconeogenesis.                            | 1.05E-4 | <sup>21</sup> |

**Supplementary Table 5c.** KEGG pathway analysis of proteins differentially expressed between BAV-D and TAV-D aorta (n=805).

| KEGG Gene Set Name                    | Description                           | FDR q    | Ref |
|---------------------------------------|---------------------------------------|----------|-----|
| REGULATION OF ACTIN CYTOSKELETON      | Regulation of actin cytoskeleton      | 1.14E-22 | 28  |
| FOCAL ADHESION                        | Focal adhesion                        | 1.16E-18 | 17  |
| LEUKOCYTE TRANSENDOTHELIAL MIGRATION  | Leukocyte transendothelial migration  | 6.31E-14 | 29  |
| ECM RECEPTOR INTERACTION              | ECM-receptor interaction              | 2.74E-12 | 20  |
| ENDOCYTOSIS                           | Endocytosis                           | 3.94E-12 | 14  |
| SPLICEOSOME                           | Spliceosome                           | 2.27E-10 | 30  |
| PATHOGENIC ESCHERICHIA COLI INFECTION | Pathogenic Escherichia coli infection | 7.43E-9  |     |
| PATHWAYS IN CANCER                    | Pathways in cancer                    | 1.37E-8  |     |
| FC GAMMA R MEDIATED PHAGOCYTOSIS      | Fc gamma R-mediated phagocytosis      | 2.28E-8  | 31  |
| TIGHT JUNCTION                        | Tight junction                        | 2.36E-8  | 32  |

**Supplementary Table 5d.** Hallmark analysis of proteins differentially expressed between BAV-D and TAV-D aorta (n=805).

| Hallmark Gene Set Name            | Description                                                         | FDR q    | Ref |
|-----------------------------------|---------------------------------------------------------------------|----------|-----|
| MTORC1 SIGNALING                  | Genes up-regulated through activation of mTORC1 complex.            | 3.21E-22 | 27  |
| EPITHELIAL MESENCHYMAL TRANSITION | Genes defining EMT, as in wound healing, fibrosis and metastasis.   | 1.98E-21 |     |
| MITOTIC SPINDLE                   | Genes important for mitotic spindle assembly.                       | 1.48E-18 | 33  |
| MYOGENESIS                        | Genes involved in development of skeletal muscle (myogenesis).      | 1.48E-18 | 34  |
| APICAL JUNCTION                   | Genes encoding components of apical junction complex.               | 9.57E-15 | 32  |
| MYC TARGETS V1                    | A subgroup of genes regulated by MYC - version 1.                   | 9.57E-15 | 35  |
| FATTY ACID METABOLISM             | Genes encoding proteins involved in metabolism of fatty acids.      | 2.93E-12 | 21  |
| PROTEIN SECRETION                 | Genes involved in protein secretion pathway.                        | 3.71E-12 | 36  |
| ADIPOGENESIS                      | Genes up-regulated during adipocyte differentiation (adipogenesis). | 3.94E-12 | 27  |
| OXIDATIVE PHOSPHORYLATION         | Genes encoding proteins involved in oxidative phosphorylation.      | 2.74E-11 | 23  |

**Supplementary Table 6.** Top 40 biological processes from the ingenuity pathway analysis of BAV-ND vs. TAV-ND (n=276) and BAV-D vs. TAV-D (n=805) aortic samples. Ingenuity pathway analysis was performed on all significant predictive loadings from OPLS-DA model according to jack-knife confidence intervals and cross-validation.

| Ingenuity Canonical Pathways                         | -log(p-value) | Ingenuity Canonical Pathways                  | -log(p-value) |
|------------------------------------------------------|---------------|-----------------------------------------------|---------------|
| Acute Phase Response Signaling                       | 9.62E00       | Actin Cytoskeleton Signaling                  | 1.02E01       |
| Complement System                                    | 5,00E00       | Integrin Signaling                            | 9.48E00       |
| Acetyl-CoA Biosynthesis I                            | 4.27E00       | RhoA Signaling                                | 9.03E00       |
| LXR/RXR Activation                                   | 4.27E00       | phagosome maturation                          | 8.43E00       |
| Clathrin-mediated Endocytosis Signaling              | 4.22E00       | Glycogen Degradation III                      | 8.39E00       |
| Caveolar-mediated Endocytosis Signaling              | 4.21E00       | Leukocyte Extravasation Signaling             | 7.97E00       |
| Mechanism of Viral Exit from Host Cells              | 3.58E00       | Signaling by Rho Family GTPases               | 7.84E00       |
| phagosome maturation                                 | 3.58E00       | Glycogen Degradation II                       | 7.61E00       |
| Remodel. of Epithelial Adherens Junctions            | 3.49E00       | RhoGDI Signaling                              | 6.6E00        |
| Ceramide Signaling                                   | 3.04E00       | Epithelial Adherens Junction Signaling        | 6.23E00       |
| 2-ketoglutarate Dehydrogenase Complex                | 2.94E00       | Paxillin Signaling                            | 6.19E00       |
| Extrinsic Prothrombin Activation Pathway             | 2.87E00       | ILK Signaling                                 | 6.19E00       |
| Coagulation System                                   | 2.85E00       | Caveolar-mediated Endocytosis Signaling       | 5.9E00        |
| Apoptosis Signaling                                  | 2.82E00       | Aldosterone Signaling in Epithelial Cells     | 5.26E00       |
| D-myo-inositol (1,4,5,6)-Tetrakisphosphate Biosynth. | 2.77E00       | Tight Junction Signaling                      | 5.17E00       |
| D-myo-inositol (3,4,5,6)-tetrakisphosphate Biosynth. | 2.77E00       | Receptor-med. Phagocytosis in Mφ, Monoc.      | 5.13E00       |
| PI3K Signaling in B Lymphocytes                      | 2.75E00       | Clathrin-mediated Endocytosis Signaling       | 4.98E00       |
| 2-oxobutanoate Degradation I                         | 2.72E00       | Ephrin Receptor Signaling                     | 4.93E00       |
| FXR/RXR Activation                                   | 2.71E00       | Germ Cell-Sertoli Cell Junction Signaling     | 4.5E00        |
| Tight Junction Signaling                             | 2.61E00       | Ephrin B Signaling                            | 4.31E00       |
| Systemic Lupus Erythematosus Signaling               | 2.58E00       | Axonal Guidance Signaling                     | 4.2E00        |
| Arginine Biosynthesis IV                             | 2.55E00       | Protein Ubiquitination Pathway                | 4.12E00       |
| Protein Ubiquitination Pathway                       | 2.49E00       | Thrombin Signaling                            | 3.9E00        |
| D-myo-inositol-5-phosphate Metabolism                | 2.47E00       | PI3K/AKT Signaling                            | 3.77E00       |
| 3-phosphoinositide Degradation                       | 2.45E00       | Protein Kinase A Signaling                    | 3.65E00       |
| Role of Tissue Factor in Cancer                      | 2.39E00       | Hepatic Fibrosis/Hepatic Stellate Cell Activ. | 3.63E00       |
| Hepatic Fibrosis/Hepatic Stellate Cell Activ.        | 2.38E00       | IL-8 Signaling                                | 3.57E00       |
| Cyclins and Cell Cycle Regulation                    | 2.34E00       | Regulation of Actin-based Motility by Rho     | 3.56E00       |
| Molecular Mechanisms of Cancer                       | 2.3E00        | Virus Entry via Endocytic Pathways            | 3.46E00       |
| 3-phosphoinositide Biosynthesis                      | 2.29E00       | GCE±12/13 Signaling                           | 3.39E00       |
| Antiproliferative Role of TOB in T Cell Signaling    | 2.25E00       | Remodeling of Epithelial Adherens Junctions   | 3.39E00       |
| Leucine Degradation I                                | 2.18E00       | Actin Nucleation by ARP-WASP Complex          | 3.29E00       |
| Intrinsic Prothrombin Activation Pathway             | 2.16E00       | Aryl Hydrocarbon Receptor Signaling           | 3.25E00       |
| TR/RXR Activation                                    | 2.16E00       | CXCR4 Signaling                               | 3.19E00       |
| HIPPO signaling                                      | 2.16E00       | Gap Junction Signaling                        | 3.19E00       |
| PI3K/AKT Signaling                                   | 2.14E00       | D-myo-inositol (1,4,5)-trisphosphate Degrad   | 3.15E00       |
| CTLA4 Signaling in Cytotoxic T Lymphocytes           | 2.12E00       | Cellular Effects of Sildenafil (Viagra)       | 3.14E00       |
| ErbB4 Signaling                                      | 2.05E00       | Cdc42 Signaling                               | 2.97E00       |
| Chronic Myeloid Leukemia Signaling                   | 2.02E00       | PAK Signaling                                 | 2.94E00       |
| IL-12 Signaling and Production in Macrophages        | 1.98E00       | 14-3-3-mediated Signaling                     | 2.92E00       |



## Supplementary Table 7: PubMed search for 30 top upregulated proteins in BAV-ND

| Gene Symbol | Protein Symbol   | Function                                                                                                                                                                                                                                                                                                                                                                                                                                                   |
|-------------|------------------|------------------------------------------------------------------------------------------------------------------------------------------------------------------------------------------------------------------------------------------------------------------------------------------------------------------------------------------------------------------------------------------------------------------------------------------------------------|
| CIC         | CIC<br>(capicua) | An HMG-box transcriptional repressor that was first identified in <i>Drosophila</i> regulating receptor tyrosine kinase (RTK) signaling. In mammals, CIC mediates RTK-dependent responses has been associated with cell proliferation, neurodegenerative diseases and cancer. <sup>37</sup>                                                                                                                                                                |
| XIAP        | XIAP             | E3 ubiquitin-protein ligase, negative regulator of apoptosis and a potential oncogene, autophagy inhibitor, <sup>38</sup> overexpressed in a variety of human cancers <sup>39</sup>                                                                                                                                                                                                                                                                        |
| CDKN1B      | CDN1B            | Synonym with P27. Regulator of cell cycle the enhanced expression of which is associated with EMT. <sup>40</sup> Differential cellular localization of p27 is associated with cancer. <sup>41</sup>                                                                                                                                                                                                                                                        |
| DNMT3A      | DNM3A            | Functions as <i>de novo</i> DNA methyltransferase. Activated in cancer. <sup>42</sup> Upregulated in EC exposed to disturbed flow causing increased DNA methylation of CpG islands within the promoter of the flow responsive gene <i>KLF4</i> <i>in vivo</i> and <i>in vitro</i> . <sup>43</sup>                                                                                                                                                          |
| RCN1        | RCN1             | Functions in secretory pathway. <sup>44</sup> Upregulated in EMT associated with renal fibrosis. <sup>45</sup> Highly upregulated in several type of cancer. <sup>46</sup>                                                                                                                                                                                                                                                                                 |
| PSMA6       | PSA6             | A major component of intracellular protein degradation apparatus. PSMA6 polymorphisms associated with type2 diabetes, myocardial infarction, and coronary artery disease. <sup>47</sup>                                                                                                                                                                                                                                                                    |
| HGS         | HGS              | Involved in a WNT/ $\beta$ -Catenin dependent cross talk in development of some types of cancer. <sup>48</sup> A component of ESCRT-0 complex, consisting of the hepatocyte growth factor-regulated tyrosine kinase substrate (Hrs) and the signal-transducing adaptor molecule (STAM) proteins, that recognizes ubiquitinated cargo during the initial step of endosomal sorting. <sup>49</sup>                                                           |
| PLXDC2      | PXDC2            | Type I transmembrane protein with some homology to nidogen and plexins, characterized as a mitogen for neural progenitors. <sup>50</sup> The expression of this protein is altered in certain types of cancer. <sup>51</sup>                                                                                                                                                                                                                               |
| POTEI       | POTEI            | Not much information available in PubMed                                                                                                                                                                                                                                                                                                                                                                                                                   |
| OTUB 1      | OTUB1            | A deubiquitinating enzyme overexpression of which is associated with several types of cancer via activation of RHOA and EMT. <sup>52,53</sup>                                                                                                                                                                                                                                                                                                              |
| SNRPB2      | RU2B             | One of the 11 genes robustly and universally linked to Membrane-Type 1 Matrix Metalloproteinase (MT1-MMP). Key invasion promoting protease in multiple cancerous tumors. <sup>54</sup>                                                                                                                                                                                                                                                                     |
| IARS2       | SYIM             | Interacting partner of chaperon protein HSP90. <sup>55</sup> Regulation of Dynein function <sup>56</sup> which in turn affects endocytosis <sup>57</sup> and autophagy. <sup>58</sup>                                                                                                                                                                                                                                                                      |
| ABAT        | GABT             | An enzyme responsible for catabolism of inhibitory neurotransmitter GABA, a new function of this protein in mitochondrial metabolism has been newly discovered. <sup>59</sup>                                                                                                                                                                                                                                                                              |
| TCEAL3      | TCAL3            | Transcription elongation factor A like 3, not much information available in PubMed                                                                                                                                                                                                                                                                                                                                                                         |
| CNOT11      | CNO11            | A module of CCR4-NOT complex. This complex is a key regulator of mRNA degradation via destabilization and inhibition of translation. <sup>60</sup>                                                                                                                                                                                                                                                                                                         |
| ARSD        | ARSD             | A metallochaperon involved in the response to arsenic environmental pollution. <sup>61</sup>                                                                                                                                                                                                                                                                                                                                                               |
| MTHFD2      | MTDC             | Regulator of Vimentin expression during EMT and breast cancer cells migration and invasion. <sup>62</sup> Has a key role in the development of cancers. <sup>63</sup>                                                                                                                                                                                                                                                                                      |
| ZYX         | ZYX              | A component of focal adhesions (FAs) and stress fiber (SF). <sup>64</sup> Mediating the cytoskeletal and extra cellular matrix (ECM) mechanotransduction. <sup>65</sup> Involved in migration of mesenchymal and cancerous cells. <sup>66</sup> Regulates adherens junction integrity and cell motility during the EMT of lung cancer. <sup>67</sup> Involved in migration of the endocardial cells during EndMT of cardiac valve formation. <sup>67</sup> |

|                |               |                                                                                                                                                                                                                                                                                                                                                                                                                          |
|----------------|---------------|--------------------------------------------------------------------------------------------------------------------------------------------------------------------------------------------------------------------------------------------------------------------------------------------------------------------------------------------------------------------------------------------------------------------------|
| <b>IL16</b>    | <b>IL16</b>   | A regulator of T cell growth and has been associated with several types of cancer. <sup>68</sup>                                                                                                                                                                                                                                                                                                                         |
| <b>C2CD5</b>   | <b>C2CD5</b>  | Characterized as a component of the MIB1 ubiquitin ligase proteomic interactome. <sup>69</sup>                                                                                                                                                                                                                                                                                                                           |
| <b>SCARB2</b>  | <b>SCARB2</b> | A lysosomal membrane glucoprotein involved in autophagy-lysosome pathway. <sup>70</sup>                                                                                                                                                                                                                                                                                                                                  |
| <b>C9orf64</b> | <b>CI064</b>  | A somatic cell memory gene regulating the difference between induced pluripotent and embryonic stem cells differences and proposed to stabilize the cells in an intermediate stage with characteristics of both somatic and reprogrammed state. <sup>71</sup> Aberrant promoter methylation of this gene is associated with ovarian cancer. <sup>72</sup> Deleted in some cases of acute myeloid leukemia. <sup>73</sup> |
| <b>SBSPON</b>  | <b>BSPO</b>   | A gene differentially expressed in pre-eclamptic placenta, a disease characterized by angiogenic imbalance and disturbed vascular function. <sup>74</sup>                                                                                                                                                                                                                                                                |
| <b>ME1</b>     | <b>MAOX</b>   | Regulates the expression of P53. <sup>75</sup> Overexpressed in cancer to cover metabolic needs of cancer cells. Diminished migration and invasion were observed in ME1-repressed cancer cells. <sup>76</sup>                                                                                                                                                                                                            |
| <b>YAP1</b>    | <b>YAP1</b>   | Transcriptional regulator of $\beta$ -catenin/WNT-driven cancers. <sup>77</sup> Required for EndMT in AVC. <sup>78</sup> Upregulates Jag-1 to activate Notch signaling in hepatocarcinoma. <sup>79</sup> Potent promoter of metastasis in breast cancer and melanoma cells. <sup>80</sup>                                                                                                                                |
| <b>SET</b>     | <b>SET</b>    | A chromatin modifying factor and histone chaperon regulating histone assembly/disassembly. <sup>81</sup> Involved in regulation of histone acetylation and DNA methylation thereby integrating epigenetic states of histones with DNA methylation. <sup>82</sup>                                                                                                                                                         |
| <b>TBC1D13</b> | <b>TBC13</b>  | Interacts with Rab35 which is a key regulator of membrane trafficking and endocytic recycling of numerous protein localized in plasma membrane, clathrin-coated pits and vesicles. Rab35 controls the recycling pathways for regulation of cell adhesion and migration. <sup>83</sup>                                                                                                                                    |
| <b>ABHD10</b>  | <b>ABHDA</b>  | Involved in protein modification. ABHD10 is responsible for deglucuronidation of acyl glucuronides <sup>84</sup> which in turn covalently modifies proteins. <sup>85</sup>                                                                                                                                                                                                                                               |
| <b>VPS25</b>   | <b>VPS25</b>  | Subunit of Endosomal Sorting Complex required for Transport II (ESCR-II) complex involved in the regulation of endosomal biogenesis and functions. Considered to be a tumor suppress through endocytic regulation of NOTCH signaling <sup>86</sup> and by sorting NOTCH in Multi Vesicular Bodies (MVBs). <sup>87</sup> Plays a role in autophagy. <sup>88</sup>                                                         |
| <b>DLAT</b>    | <b>ODP2</b>   | Interacts with 20S proteasome component PSMA as a part of ubiquitin-independent protein degradation pathway. <sup>89</sup> Mutations in the gene causes neurodegenerative disease in human. <sup>90</sup>                                                                                                                                                                                                                |

## Supplementary Table 8: PubMed search for 30 top downregulated proteins in BAV-ND

| Gene Symbol    | Protein Symbol | Function                                                                                                                                                                                                                                                                                                                                                                                                                                                                     |
|----------------|----------------|------------------------------------------------------------------------------------------------------------------------------------------------------------------------------------------------------------------------------------------------------------------------------------------------------------------------------------------------------------------------------------------------------------------------------------------------------------------------------|
| ---            | <b>KV111</b>   | Ig kappa chain V-I region                                                                                                                                                                                                                                                                                                                                                                                                                                                    |
| <b>PSMC3</b>   | <b>PRSGA</b>   | An AAA-ATPase component of the 19S regulative subunit of the proteasome and a negative regulator of Akt kinase. <sup>91</sup> It stabilizes and protects the tumor suppressor p14ARF from degradation <sup>92</sup> and inhibits the oncogenic phenotype of transformed cells expressing rbB oncogene. TBP1 overexpression diminished cell proliferation. <sup>93</sup>                                                                                                      |
| ---            | <b>KV120</b>   | Ig kappa chain V-I region                                                                                                                                                                                                                                                                                                                                                                                                                                                    |
| <b>ADAL</b>    | <b>ADAL</b>    | Functions in enzymatic activation of antineoplastic and antiretroviral agents. <sup>94</sup> Down regulation of this gene was associated with higher incidence of colorectal cancer in African Americans. <sup>95</sup>                                                                                                                                                                                                                                                      |
| <b>ASAP2</b>   | <b>ASAP2</b>   | GTPase-activating protein (GAP) involved in regulation of the subcellular localization of paxillin. Overexpression blocked cell migratory activities. <sup>96</sup> Involved in macrophage phagocytosis. <sup>97</sup> The expression of this gene is reduced in renal cell carcinomas compared to non-cancer tissues <sup>98</sup> and proposed to be a biomarker for pituitary tumor. <sup>99</sup>                                                                        |
| <b>ARMCX3</b>  | <b>ARMX3</b>   | Integral membrane protein of the mitochondrial outer membrane regulating mitochondrial dynamics and trafficking. Interacts with the component of neural crest Sox10. <sup>100</sup> Its degradation is regulated by non-canonical WNT/PKC pathway. <sup>101</sup>                                                                                                                                                                                                            |
| <b>PPP2R5E</b> | <b>2A5E</b>    | A tumor suppressor. <sup>102</sup> Its down regulation suppresses apoptosis and facilitate the growth of gastric cancer cells. <sup>103</sup> and has been reported in several types of cancer. <sup>104-106</sup>                                                                                                                                                                                                                                                           |
| <b>EPS8L2</b>  | <b>ES8L2</b>   | A part of a multimolecular complex required for RAC activation leading to actin cytoskeletal remodeling, <sup>107</sup> up regulated in endometrial cancer. <sup>108</sup>                                                                                                                                                                                                                                                                                                   |
| <b>RPAP3</b>   | <b>RPAP3</b>   | A pro-apoptosis protein interacting with RNAPII transcription machinery. <sup>109</sup> Loss of this protein improved HeLa cell survival after UV-induced DNA damage. <sup>110</sup> A proposed target for anti-cancer therapy. <sup>111</sup>                                                                                                                                                                                                                               |
| <b>BIRC6</b>   | <b>BIRC6</b>   | A peripheral membrane protein of the trans-Golgi network functioning as a chimeric E2/E3 ubiquitin ligase as well as being a member of the inhibitor of apoptosis (IAP) family. <sup>112</sup> Interacts with p53 and facilitates its degradation. Its elevated expression has been associated with poor prognosis in several types of cancers. <sup>113-116</sup>                                                                                                           |
| <b>HP</b>      | <b>HPT</b>     | A protein that binds free hemoglobin thus preventing heme-iron mediated oxidative stress caused by hemolysis. <sup>117</sup> Administration of this protein has been proposed to be beneficial in the treatment of diabetes <sup>118</sup> and atherosclerosis. <sup>119</sup> Reduced haptoglobin increases the risk of endothelium being exposed to oxidative damage caused by extracellular hemoglobin. <sup>119,120</sup>                                                |
| ---            | <b>HV305</b>   | Ig heavy chain V-III region                                                                                                                                                                                                                                                                                                                                                                                                                                                  |
| <b>TGFB1</b>   | <b>TGFB1</b>   | TGFB1, associated with many biological processes involved in aneurysm. In mice, epigenetic silencing of this protein gave rise to a BAV and increased endocardial EndMT                                                                                                                                                                                                                                                                                                      |
| <b>RAP2A</b>   | <b>RAP2A</b>   | A member of the small GTPase superfamily. Regulates the stability of LRP6 receptor for Wnt/ $\beta$ -catenin signaling. <sup>121</sup> It is the direct transcription target of P53 and enhances the migration and invasive ability of some cancer cells <sup>122</sup> while the overexpressed of this protein significantly inhibited the migration and invasion of glioma cells via down regulation of AKT. <sup>123</sup> Involved in integrin signaling. <sup>124</sup> |
| <b>CFB</b>     | <b>CFAB</b>    | Complement factor B                                                                                                                                                                                                                                                                                                                                                                                                                                                          |
| <b>ERAP2</b>   | <b>ERAP2</b>   | This protein has a key role in the generation of antigenic epitopes and hence may contribute to cancer predisposition through regulation of generation or destruction of tumor antigens. <sup>125</sup> Is associated with Epithelial cell adhesion molecule (EPCAM) which is also a marker for cancer cells. <sup>126</sup>                                                                                                                                                 |

|               |               |                                                                                                                                                                                                                                                                                                                                                                                                                           |
|---------------|---------------|---------------------------------------------------------------------------------------------------------------------------------------------------------------------------------------------------------------------------------------------------------------------------------------------------------------------------------------------------------------------------------------------------------------------------|
| <b>KLHDC4</b> | <b>KLDC4</b>  | Identified as RNA binding protein in mRNA interactome of proliferating human HeLa cells. <sup>127</sup> Identified as TRF1 interacting protein in a large-scale screening for regulators of telomeres associated proteins in human cells using protein-protein interaction. <sup>128</sup>                                                                                                                                |
| <b>HLA-A</b>  | <b>1A01</b>   | The MHC class I cell surface receptors involved in the immune response and consists of heterodimeric molecules binding short peptides. Reduced expression of HLA-A has been implicated in tumor progression and metastasis with poorer survival outcome. <sup>129</sup>                                                                                                                                                   |
| <b>RNPEP</b>  | <b>AMPB</b>   | A transcription factor involved in the renin-angiotensin-aldosterone system in atheroma. <sup>130</sup>                                                                                                                                                                                                                                                                                                                   |
| <b>IGKC</b>   | <b>IGKC</b>   | Immunoglobulin $\kappa$ chain, a robust immune marker for prediction of survival and response to chemotherapy in several types of cancer. <sup>131</sup>                                                                                                                                                                                                                                                                  |
| <b>UBE3C</b>  | <b>UBE3C</b>  | A ubiquitin protein ligase involved in K29 and $\kappa$ K33 polyubiquitination. <sup>132</sup> Promotes growth and metastasis of renal cell carcinoma via activating Wnt/ $\beta$ -Catenin pathway. Mutation in this gene is associated with hepatocellular carcinoma by regulation of epithelial-mesenchymal transition. <sup>133</sup> Protects cells against harmful accumulation of degraded proteins. <sup>134</sup> |
| <b>ABCB9</b>  | <b>ABCB9</b>  | An ABC transporter transporting cytosolic peptides into the lumen of lysosomes for degradation via ATP hydrolysis. <sup>135</sup>                                                                                                                                                                                                                                                                                         |
| <b>BAX</b>    | <b>BAX</b>    | A cytosolic pro-apoptotic protein causing mitochondrial outer membrane permeabilization by localization to the mitochondrial outer membrane. Down regulated in cancer. <sup>136</sup> Plays a role in cross talk between autophagy and apoptosis. <sup>137</sup>                                                                                                                                                          |
| ---           | <b>KV104</b>  | Ig kappa chain V-I region                                                                                                                                                                                                                                                                                                                                                                                                 |
| <b>TBCE</b>   | <b>TBCE</b>   | A tubulin specific chaperon, <sup>138</sup> folding $\alpha$ -tubulin to promote $\alpha/\beta$ dimerization, protecting it from misfolded protein stress. <sup>139</sup>                                                                                                                                                                                                                                                 |
| ---           | <b>KV102</b>  | Ig kappa chain V-I region                                                                                                                                                                                                                                                                                                                                                                                                 |
| <b>UBR1</b>   | <b>UBR1</b>   | Ubiquitin ligase associated with protein degradation. <sup>140,141</sup>                                                                                                                                                                                                                                                                                                                                                  |
| ---           | <b>KV113</b>  | Ig kappa chain V-I region                                                                                                                                                                                                                                                                                                                                                                                                 |
| <b>RAB12</b>  | <b>RAB12</b>  | A small GTPase activated in autophagy involved in protein degradation and trafficking. <sup>142,143</sup>                                                                                                                                                                                                                                                                                                                 |
| <b>ZNF207</b> | <b>ZNF207</b> | Microtubule binding zinc finger protein. Associates with spindle microtubules and regulates chromosome alignment. <sup>144,145</sup>                                                                                                                                                                                                                                                                                      |

**Supplementary Table 9.** Gene expression profile comparison between BAV-ND (n=31) vs. TAV-ND (n=22) and BAV-D (n=46) vs. TAV-D (n=24). Gene expression is corrected for age, adapted from Folkersen et al, 2011.<sup>11</sup> ( ) indicates tendency for up- or downregulation with *P* values ranging from >0.05 to <0.1. Loading values for proteins analyzed by HiRiEF and LC-MS/MS are given. A negative loading indicates a lower protein expression in BAV, a positive loading indicates a higher expression in BAV. NS, detected by proteomic analysis but not differentially expressed; -, not detected by proteomic analysis.

|                                    | BAV-ND vs. TAV-ND |         |         | BAV-D vs. TAV-D |         |         |
|------------------------------------|-------------------|---------|---------|-----------------|---------|---------|
|                                    | mRNA              |         | Protein | mRNA            |         | Protein |
|                                    | P-value           | Down in | Loading | P-value         | Down in | Loading |
| <b>VEGF Family</b>                 |                   |         |         |                 |         |         |
| VEGFA                              | 0.08              | (BAV)   | -       | <0.001          | BAV     | -       |
| VEGFB                              | NS                |         | -       | NS              |         | -       |
| VEGFC                              | <0.01             | BAV     | NS      | <0.001          | BAV     | NS      |
| VEGFR1 (FLT1)                      | <0.05             | BAV     | -       | <0.001          | BAV     | -       |
| VEGFR2 (KDR)                       | 0.09              | (BAV)   | -       | 0.065           | (BAV)   | -       |
| VEGFR3 (FLT4)                      | NS                |         | -       | NS              |         | -       |
| NRP1                               | NS                |         | NS      | <0.01           | BAV     | -0.020  |
| NRP2                               | NS                |         | NS      | <0.01           | BAV     | -0.020  |
| <b>Regulation of Cell Junction</b> |                   |         |         |                 |         |         |
| CLDN5                              | NS                |         | -       | <0.05           | BAV     | -       |
| CDH1 (E-Cadherin)                  | NS                |         | -       | NS              |         | -       |
| CDH2 (N-Cadherin)                  | NS                |         | NS      | <0.05           | TAV     | 0.024   |
| CDH5 (VE-Cadherin)                 | NS                |         | -       | <0.01           | BAV     | -       |
| PECAM1                             | NS                |         | NS      | <0.001          | BAV     | -0.026  |
| PTPRB                              | NS                |         | -       | <0.05           | BAV     | -       |
| ZEB1                               | NS                |         | -       | 0.001           | TAV     | -       |
| <b>RHO pathway kinases</b>         |                   |         |         |                 |         |         |
| MYLK                               | NS                |         | -       | <0.001          | TAV     | -       |
| ROCK2                              | NS                |         | NS      | <0.05           | TAV     | 0.027   |
| <b>Regulation of NOTCH</b>         |                   |         |         |                 |         |         |
| NOTCH1                             | 0.09              | (BAV)   | -       | <0.01           | BAV     | -       |
| NOTCH2                             | NS                |         | -       | NS              |         | -       |
| NOTCH3                             | NS                |         | NS      | 0.055           | (BAV)   | 0.025   |
| NOTCH4                             | NS                |         | -       | NS              |         | -       |
| JAG1                               | NS                |         | -       | NS              |         | -       |
| JAG2                               | NS                |         | -       | NS              |         | -       |
| DLL4                               | NS                |         | -       | <0.05           | BAV     | -       |
| MFNG                               | NS                |         | -       | <0.001          | BAV     | -       |
| MIB1                               | <0.05             | TAV     | NS      | <0.05           | TAV     | 0.026   |

# Figure S1

**PCA (a and c) and OPLS-DA (b and d) of protein expression data.** The analyses were performed on 10 non-dilated (BAV-ND=5, TAV-ND=5) (a-b) and 11 dilated (BAV-D=6, TAV-D=5) (c-d) patients, respectively, and 2894 proteins. Two-dimensional score plot of PCA showing the PC1-PC2 plane, and OPLS-DA showing the first predictive component (tp1) and orthogonal component (to1) plane of BAV (green) and TAV (blue) thoracic aortic tissue samples.

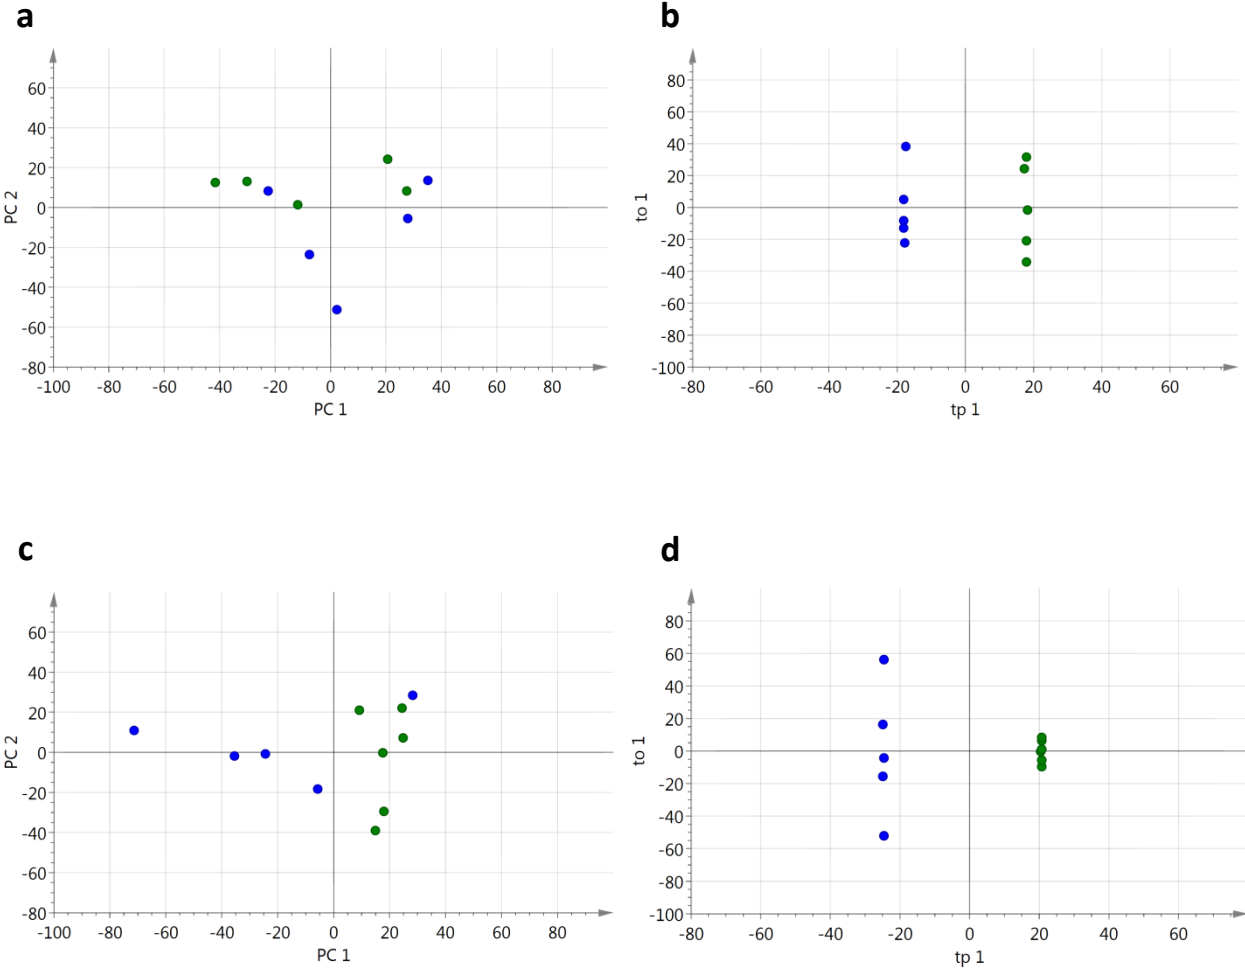

## Figure S2

**Protein-protein interactions (PPIs) network of proteins involved in enriched Hallmark gene sets shown in Table S5b and S5d.** Interactions are retrieved from Human Protein Reference Database (HPRD). Proteins are colored according to the direction of expression change in non-dilated samples and dilated samples respectively. Red indicates up-regulated in BAV compared to TAV; Green indicates down-regulated in BAV and grey indicates unchanged.

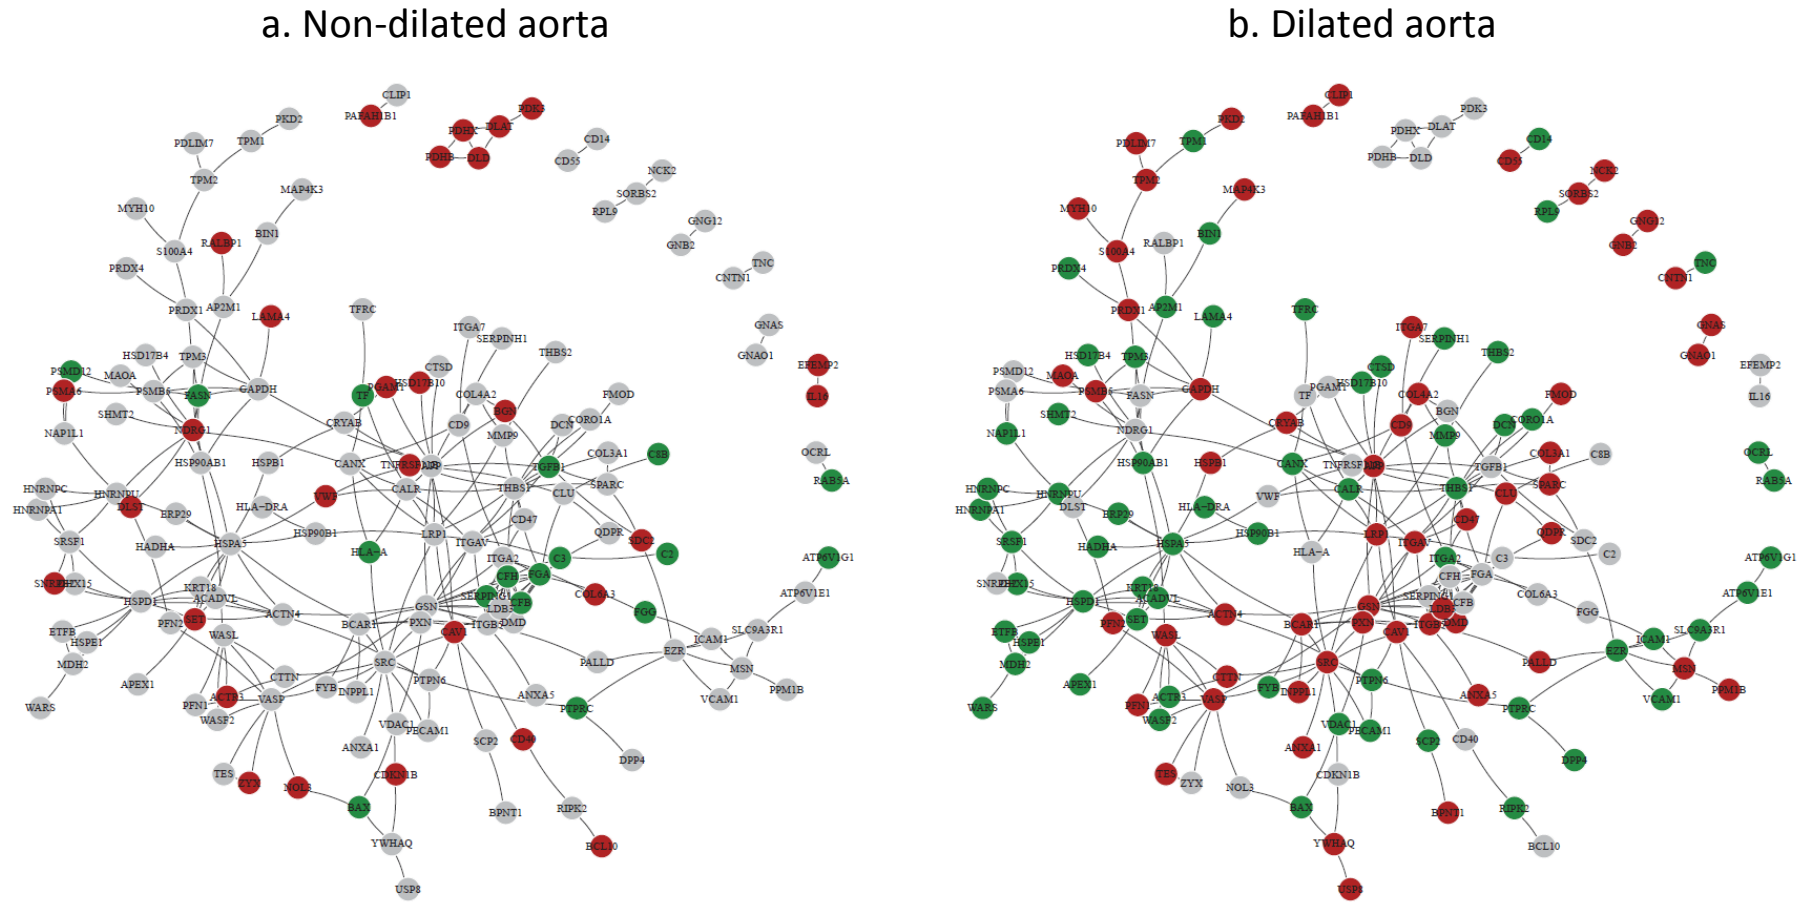

## Figure S3 (a-l)

Higher magnification of major pathways from KEGG and hallmark analyses. The left and right panels are showing non-dilated and dilated aortas, respectively. Proteins are colored according to the direction of expression. Red: up-regulated in BAV; Green down-regulated in BAV; Grey unchanged.

Figure S3a. ENDOCYTOSIS

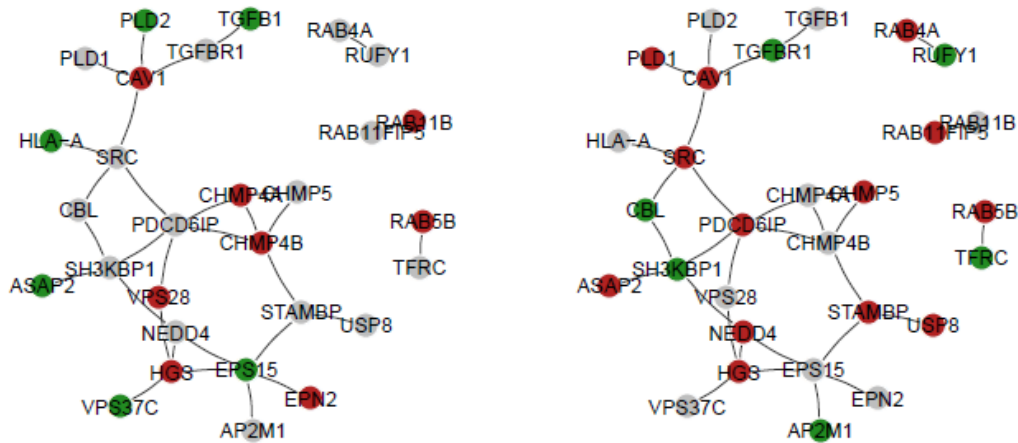

Figure S3b. FOCAL ADHESION

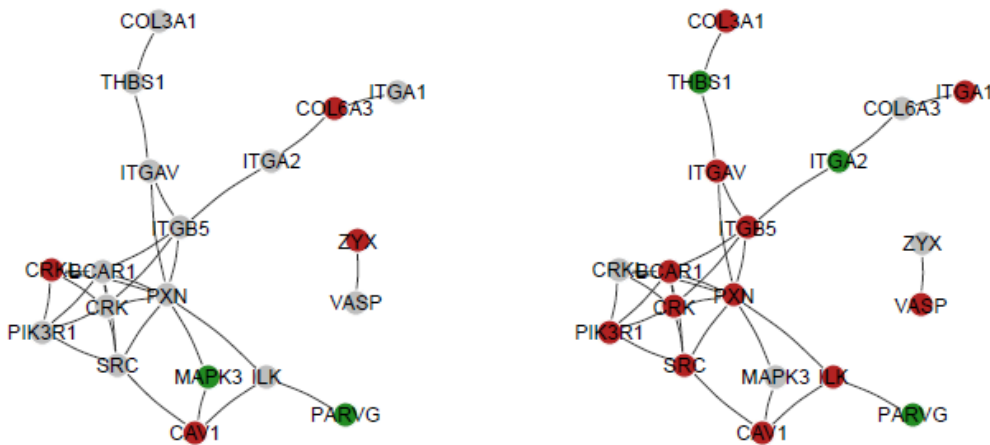

Figure S3c. ECM-RECEPTOR INTERACTION

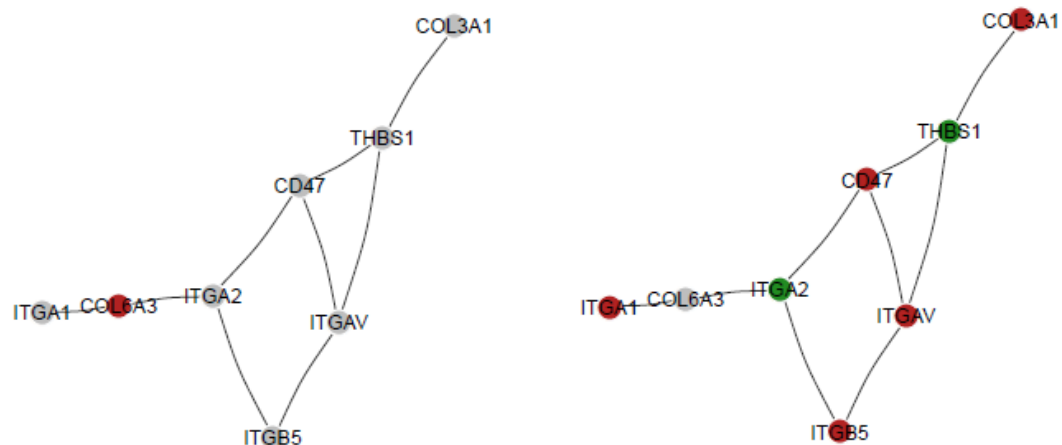



Figure S3d. PATHWAY IN CANCER

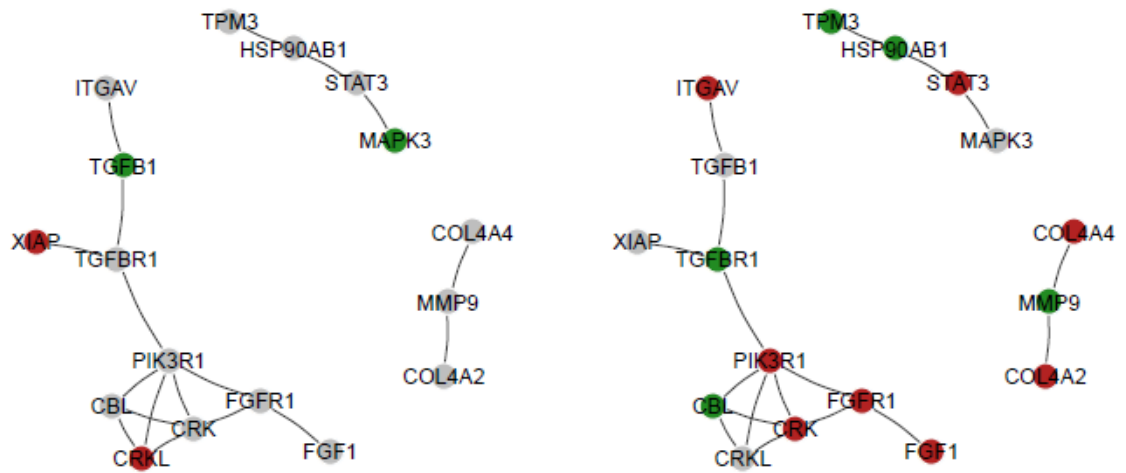

Figure S3e. REGULATION OF ACTIN CYTOSKELETON

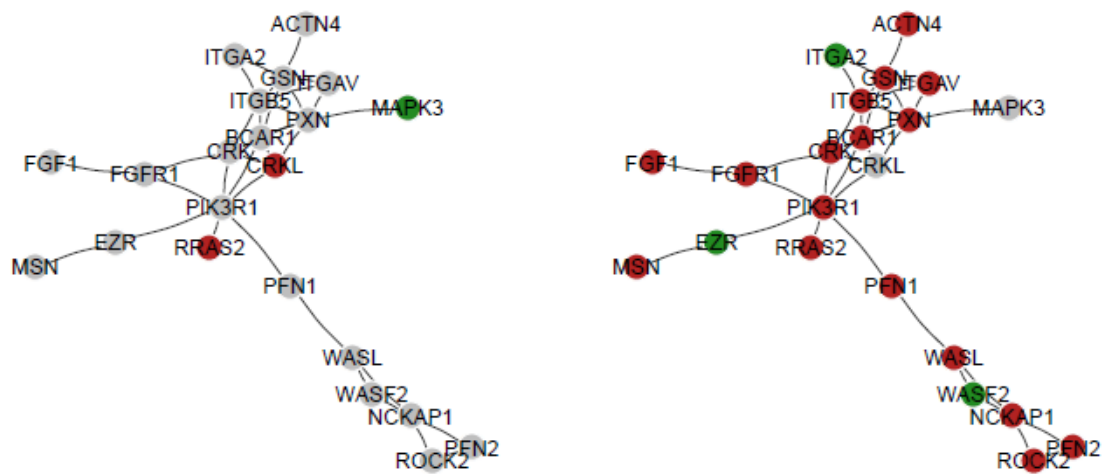

Figure S3f. LEUKOCYTE TRANSENDOTHELIAL MIGRATION

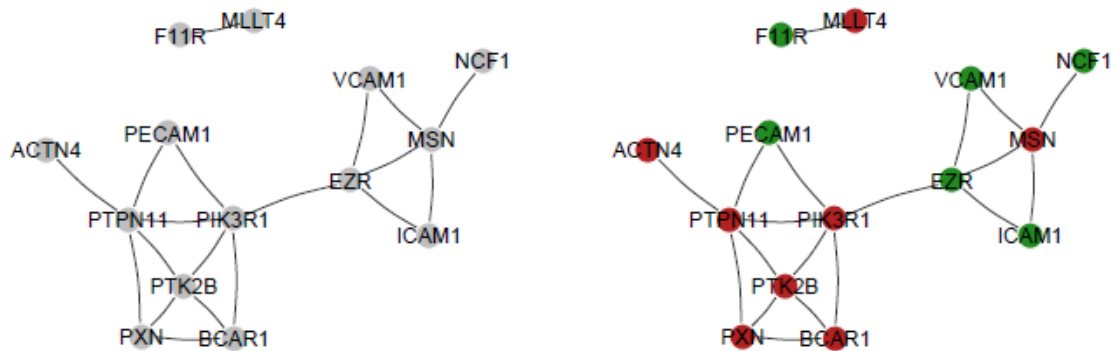

Figure S3g. SPLICEOSOME

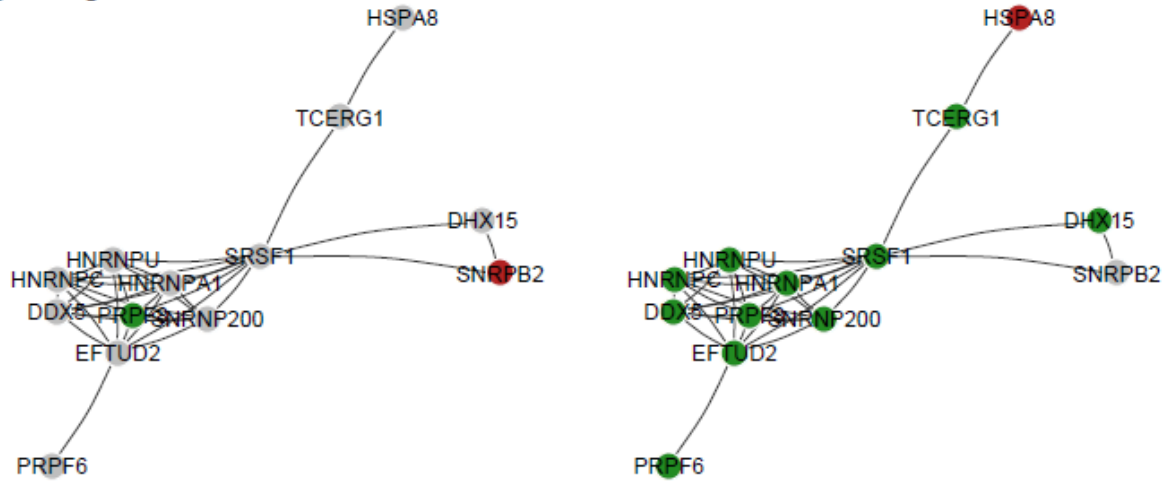

Figure S3h. COAGULATION

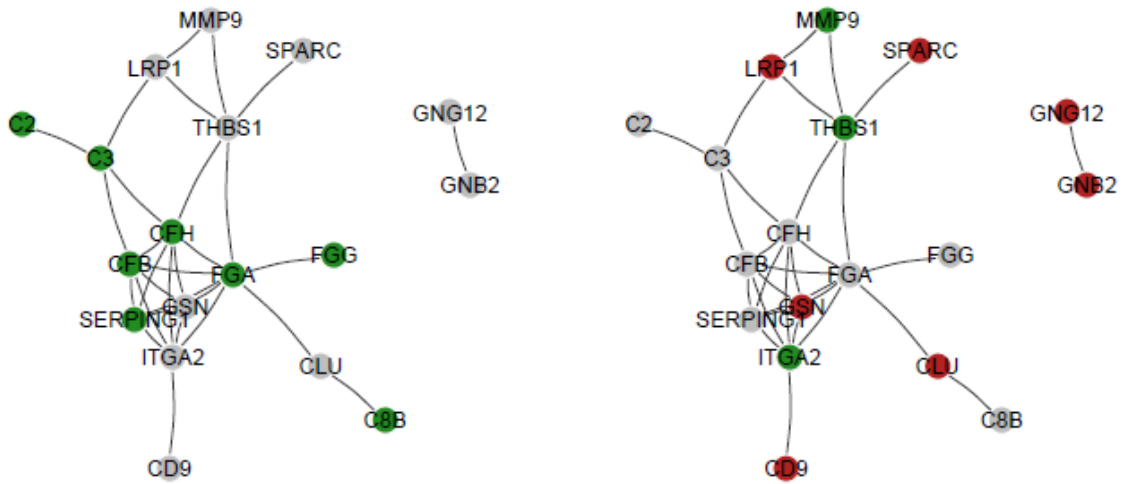

Figure S3i. EPITHELIAL MESENCHYMAL TRANSITION

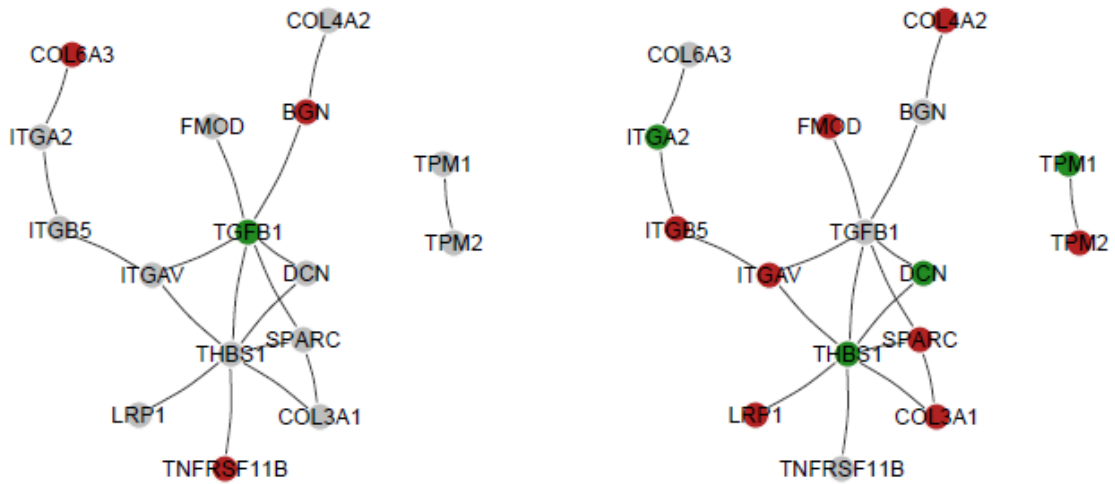

Figure S3j. MYOGENESIS

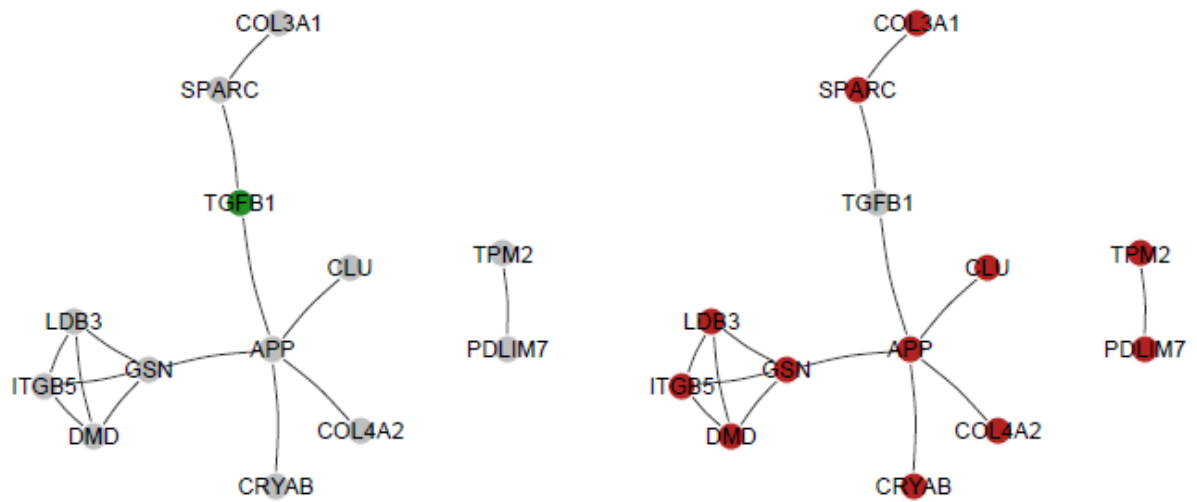

Figure S3k. APICAL JUNCTION

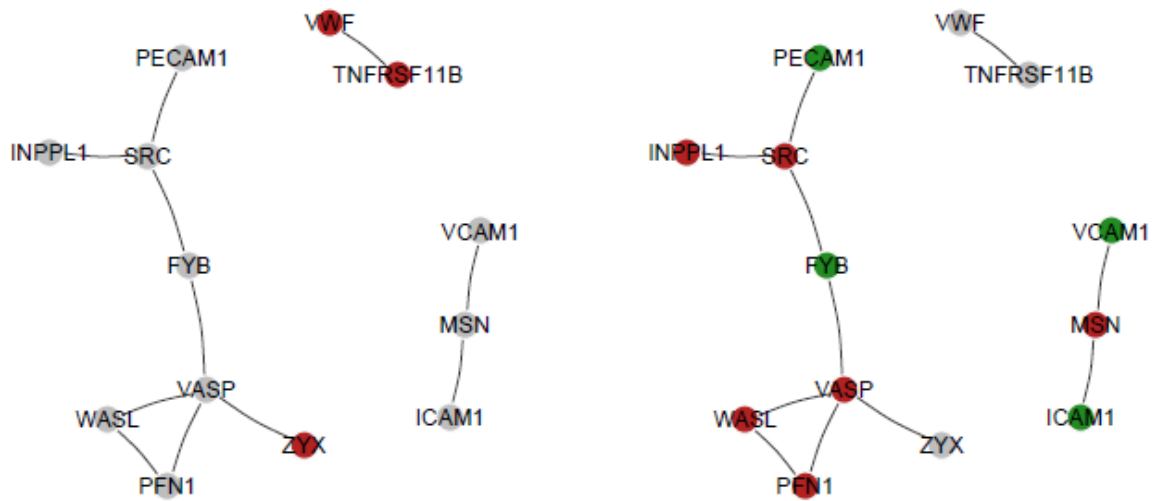

Figure S3l. MYC TARGETS V1

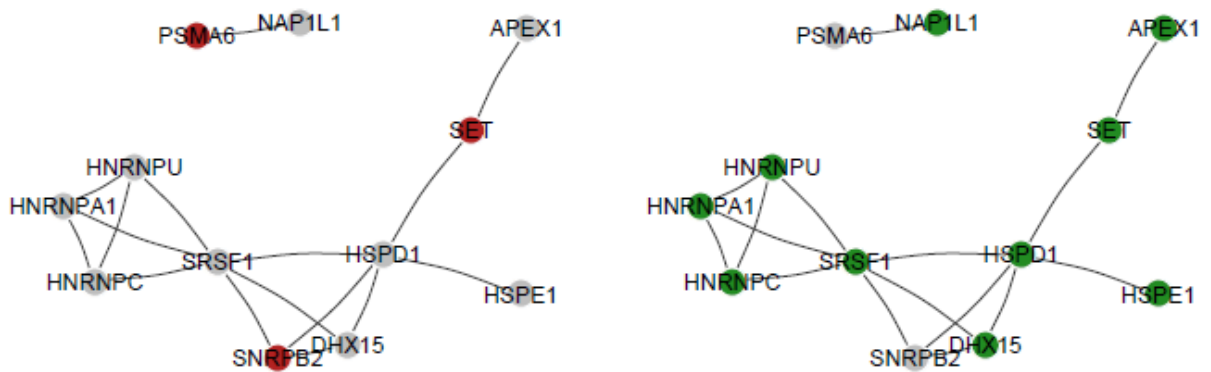

**Figure S4**

**EM view of EC junctions in BAV-D (a-b) and TAV-D (c).** Extensive degradation at EC junction (a) and stress fiber formation adjacent to late lysosomes (b) in BAV compared to TAV patients with dilated aortas. SF, stress fibers; LL, late lysosomes. Patients: N=2 in each group.

**a BAV-D**

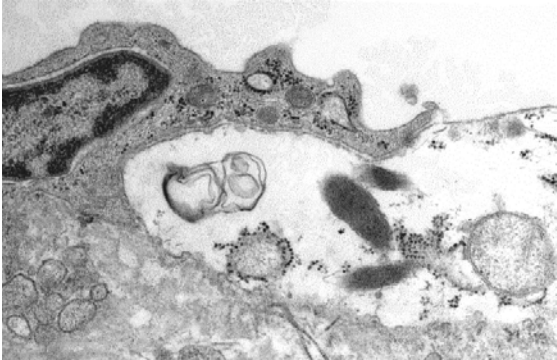

**b BAV-D**

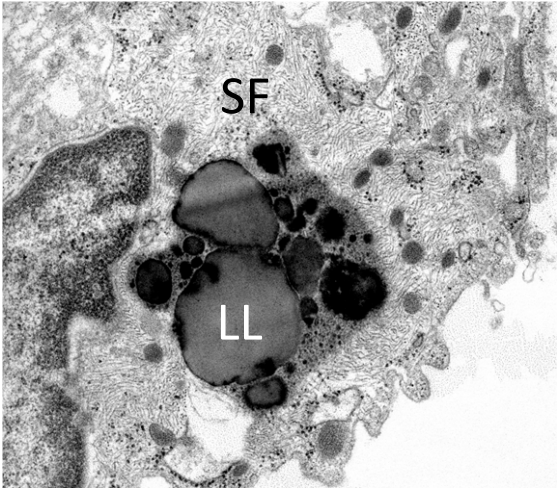

**c TAV-D**

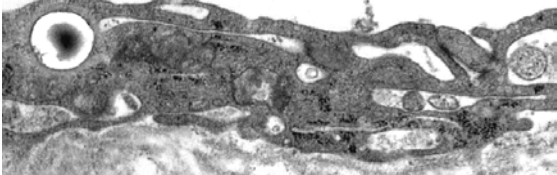

**Figure S5**

**Staining of neovascularization areas, as internal control.** Pictures are taken from neovascularization areas of the same sections stained for localization and quantification of AJ protein, CDH5, CDH5-P, in intima, Scale bar= 50µm, Patients: N=7-9 in each group, PTPRB N=3 in each group.

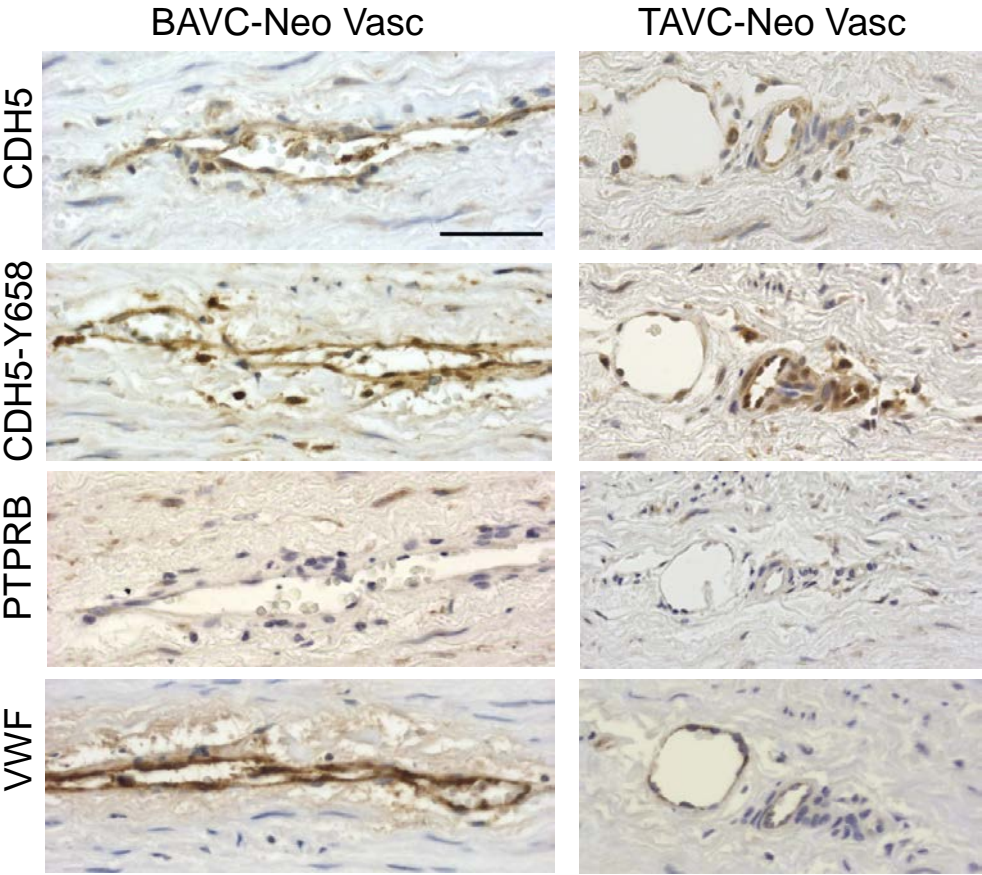

**Figure S6**

*Comparison between BAV-ND (a) and TAV-ND (b) patients for relative distribution of PTPRB and CDH5-Y658, using serial sections. Scale bar= 50µm, Patients: N=3 in each group.*

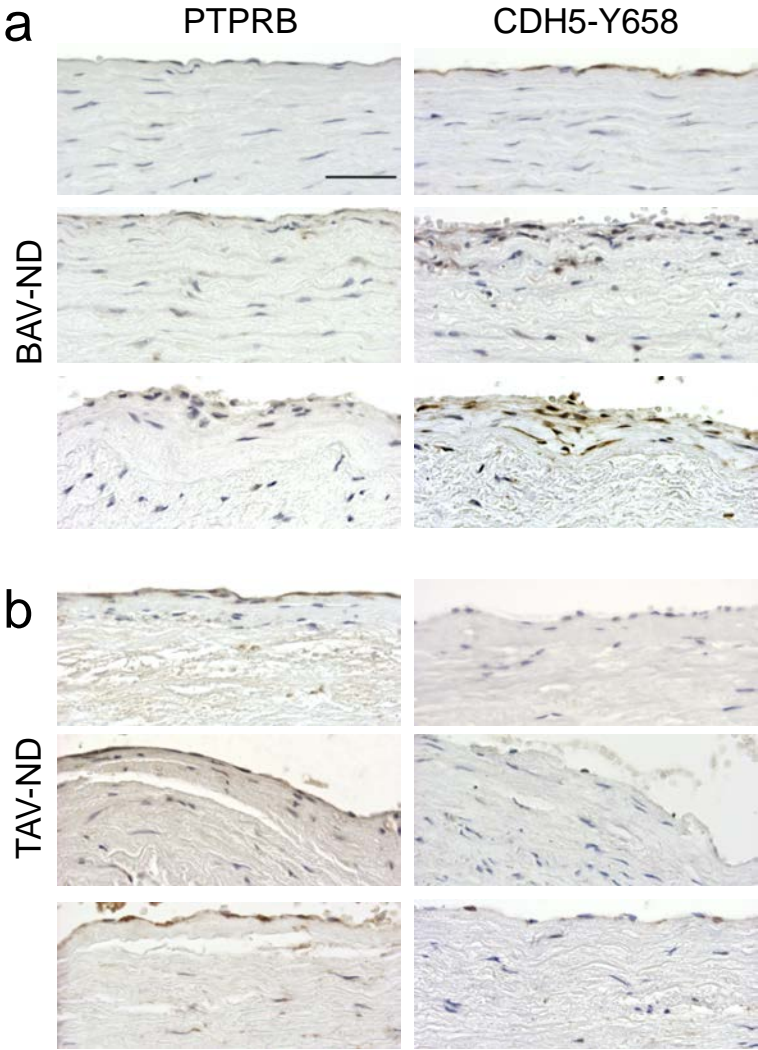

**Figure S7**

**Examination of the connection between proliferative state and cell-cell junctions.** We stained consecutive sections of a BAV-ND patient with high intimal proliferative activity, for CDH5, Phos-CDH5-Y658, PTPRB phosphatase, ZEB1 and KI67. The results further strengthened that the increased cell division in intimal layer, corresponded to the strong staining of anti-Phos-CDH5-Y658 and decreased PTPRB phosphatase activity, increased ZEB1 staining, implying that the higher cell proliferation, activation of EMT transcription factor and instability of the cell junctions are related and coordinated processes in BAV-ND, Scale bar= 50µm.

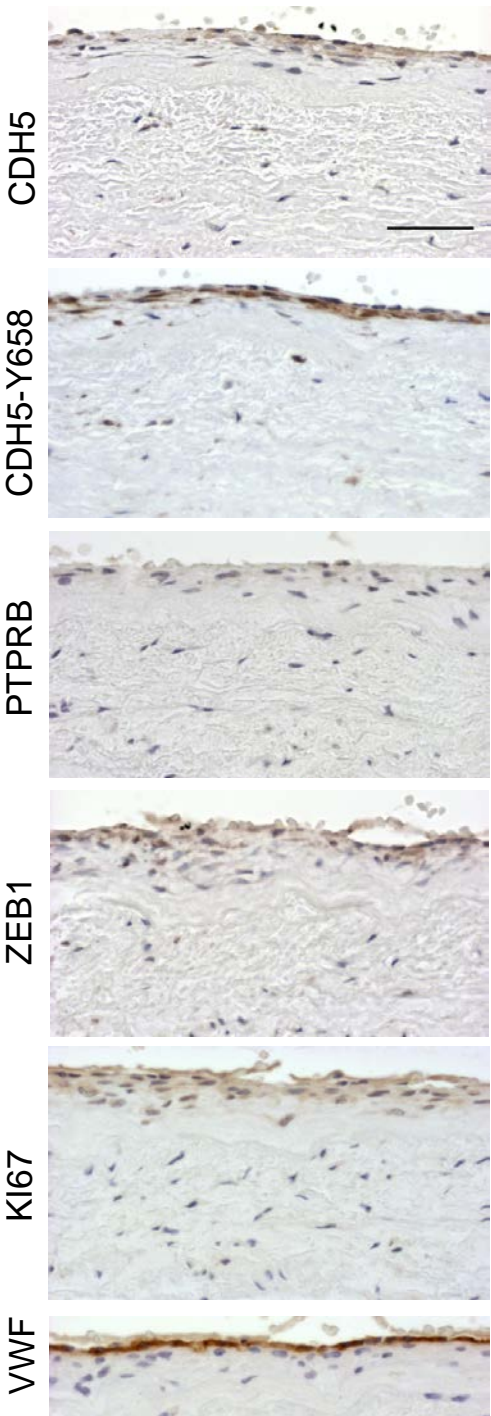

**Figure S8:**

*Decreased and increased expressions of MFNG and MYLK, respectively, in BAV-ND.* Western blot analysis of 20 µg protein extract from TAV (T) and BAV (B) non-dilated aorta incubated with (a) anti-MFNG antibody and (b) quantification of MFNG/Actinβ ratio (student's t-test); (c) anti-MYLK, (d) quantification MYLK/Actinβ ratio (student's t-test).

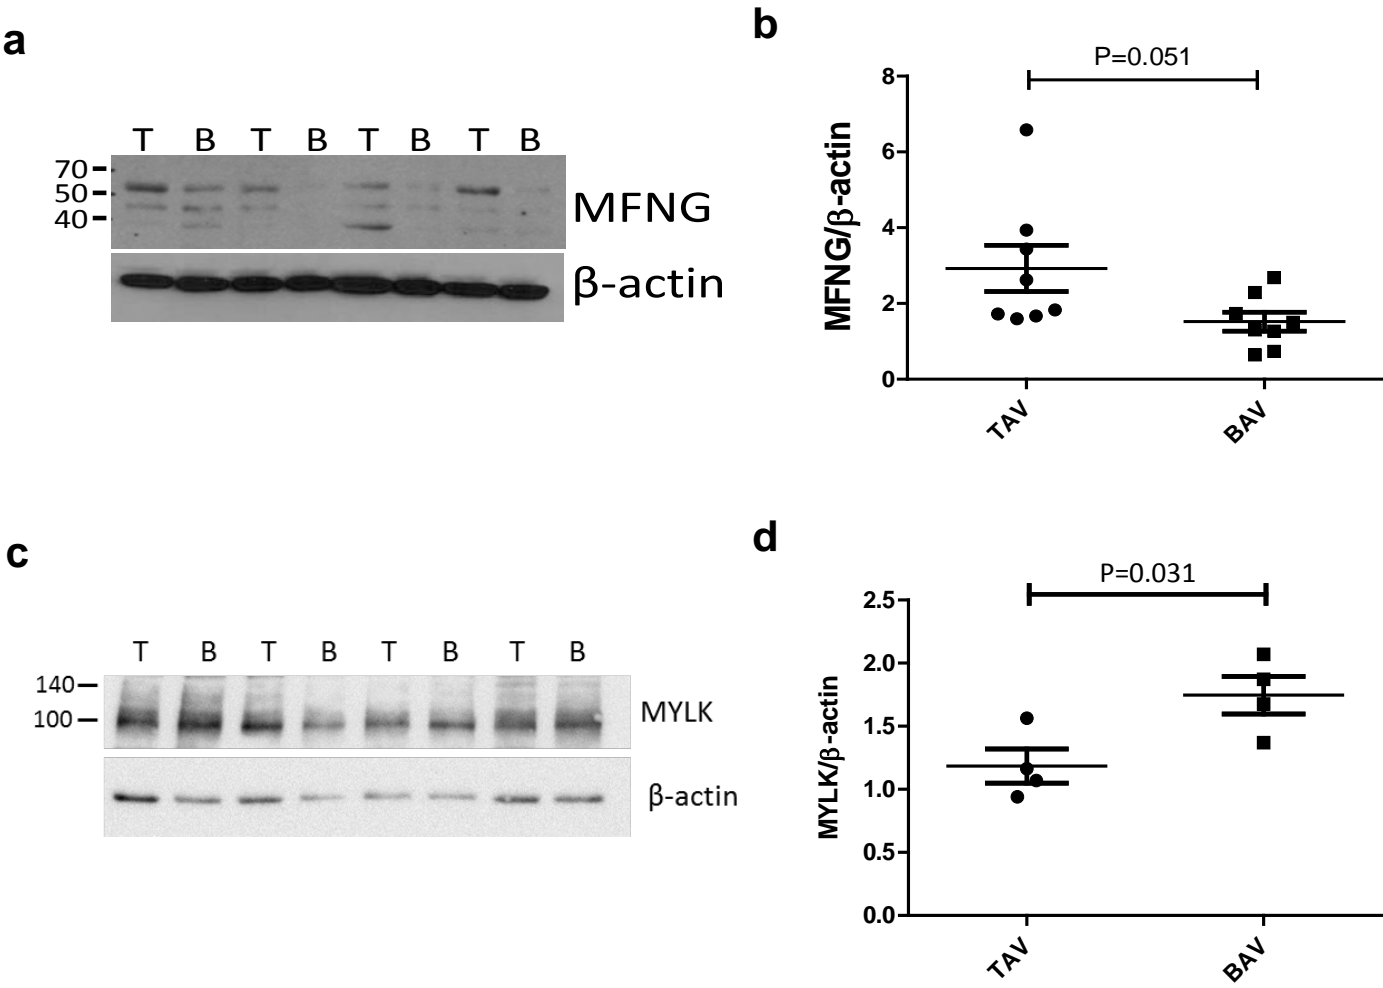



**Figure S9**

*Internal thoracic arteries stained with antibodies used for aorta.* Cell junction proteins, Scale bar= 50µm, Patients: N=7 in each group.

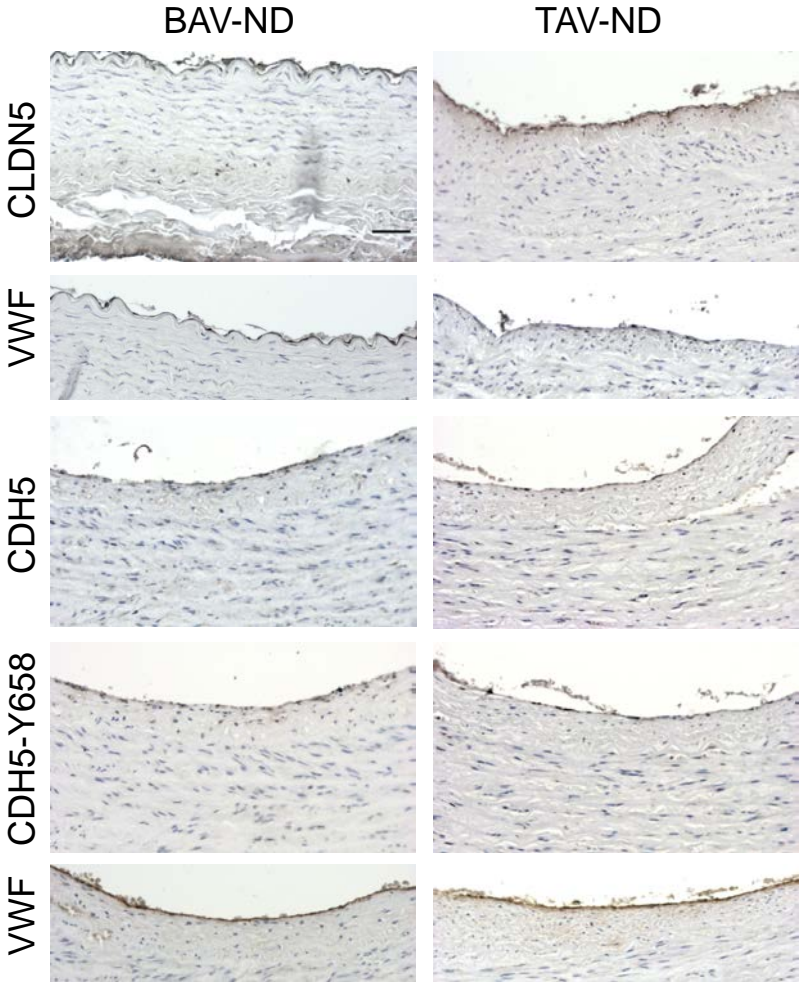

**Figure S10**

*Internal thoracic arteries stained with antibodies used for aorta. RHOA pathway kinases, Scale bar= 50µm, Patients: N=7 in each group.*

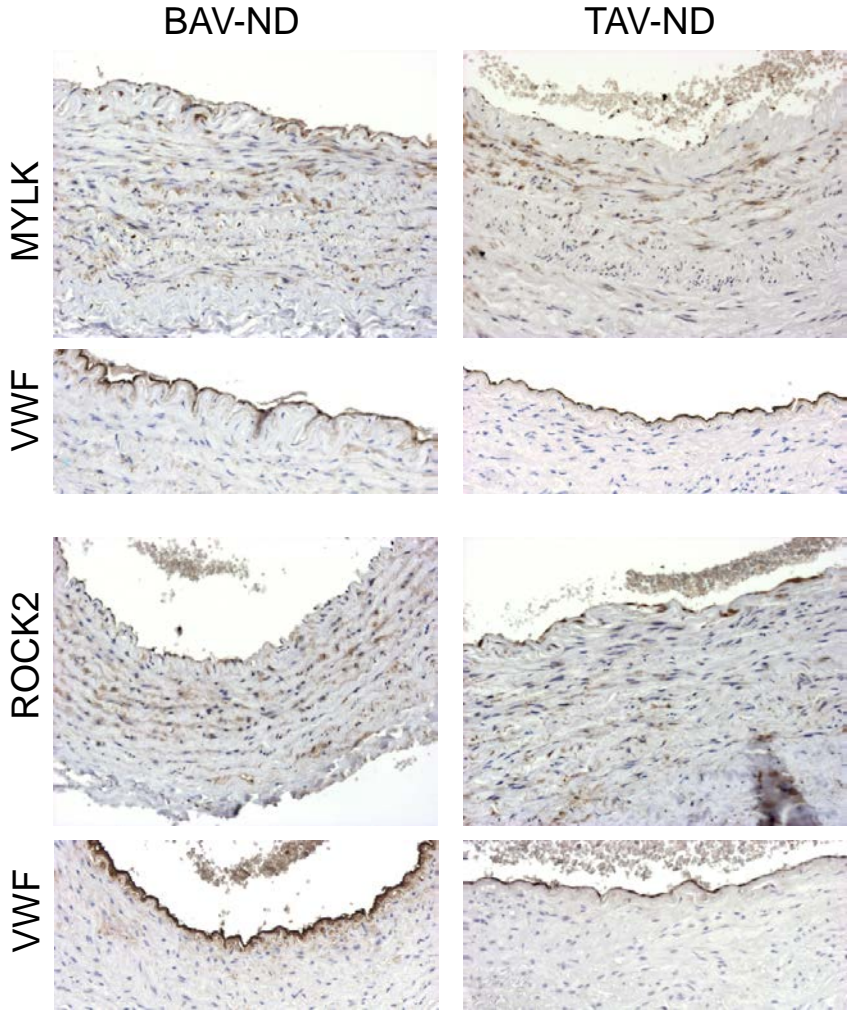

**Figure S11**

*Internal thoracic arteries stained with antibodies used for aorta.* RHOA pathway, Protein expression of Myosin II subunits MYL9, MYL9-P and MYL6, Scale bar= 50µm, Patients: N=7 in each group.

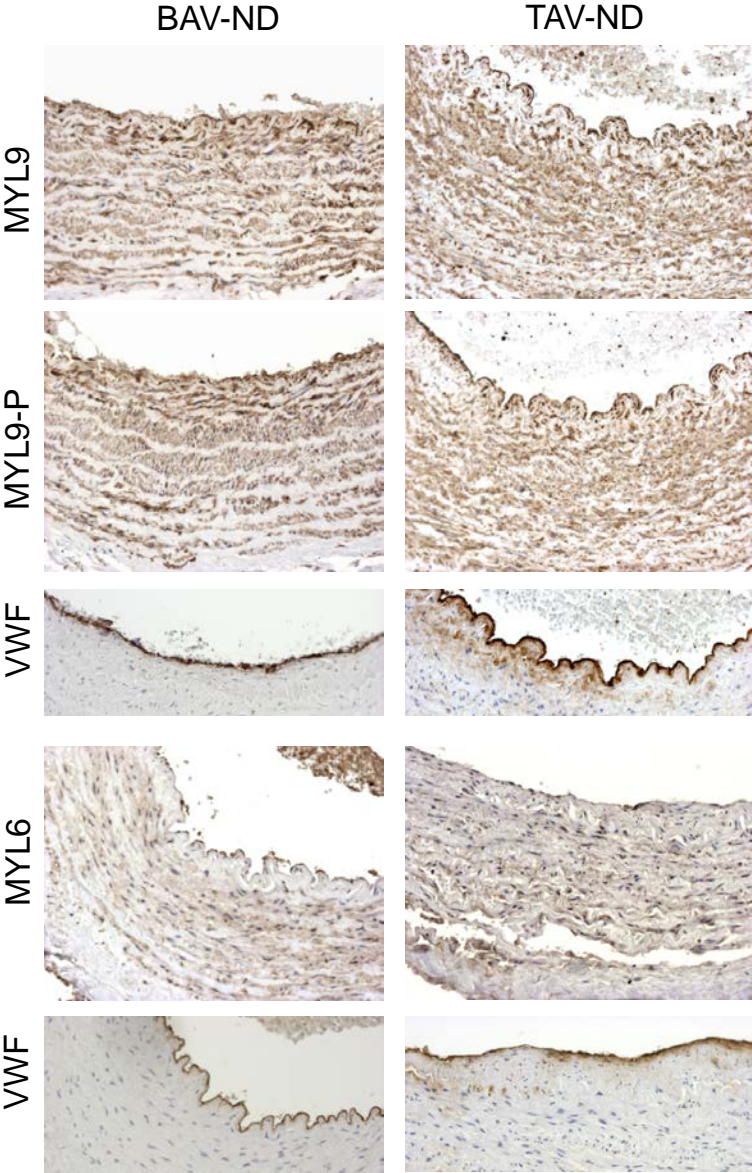

**Figure S12**

*Internal thoracic arteries stained with antibodies used for aorta. NOCH pathway, Scale bar= 50µm, Patients: N=7 in each group.*

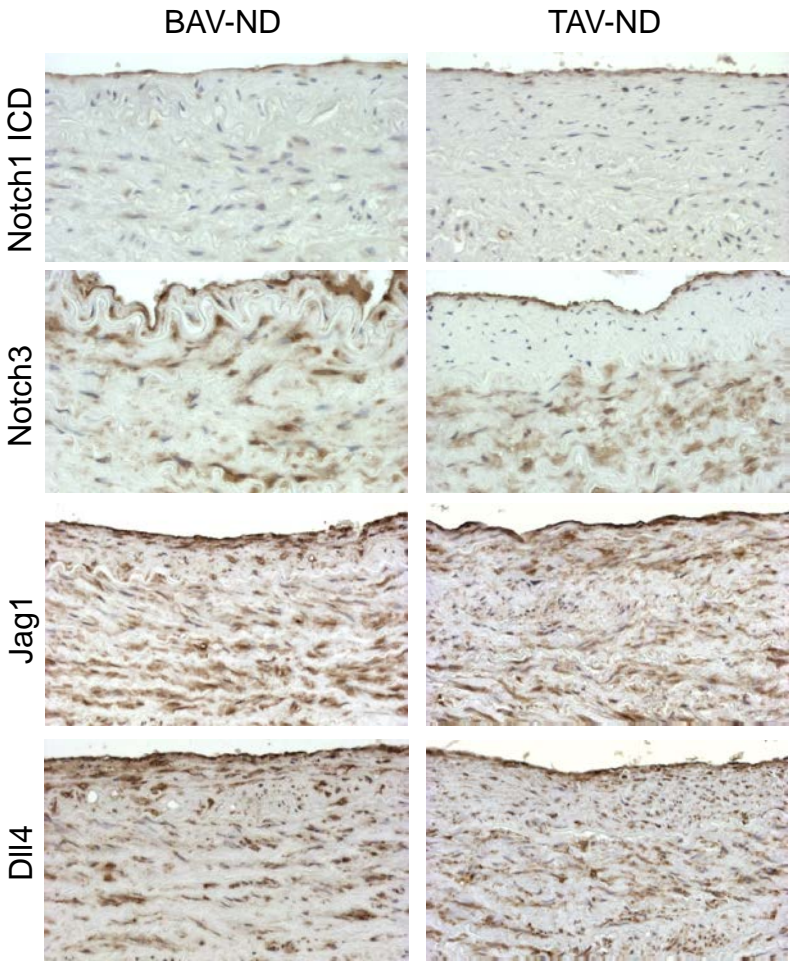

## References

- 1 Jackson, V. *et al.* Bicuspid aortic valve leaflet morphology in relation to aortic root morphology: a study of 300 patients undergoing open-heart surgery. *European journal of cardio-thoracic surgery : official journal of the European Association for Cardio-thoracic Surgery* **40**, e118-124, doi:10.1016/j.ejcts.2011.04.014 (2011).
- 2 Kjellqvist, S. *et al.* A combined proteomic and transcriptomic approach shows diverging molecular mechanisms in thoracic aortic aneurysm development in patients with tricuspid- and bicuspid aortic valve. *Molecular & cellular proteomics : MCP* **12**, 407-425, doi:10.1074/mcp.M112.021873 (2013).
- 3 Branca, R. M. *et al.* HiRIEF LC-MS enables deep proteome coverage and unbiased proteogenomics. *Nat Methods* **11**, 59-62, doi:10.1038/nmeth.2732 (2014).
- 4 Maleki, S. *et al.* Identification of a novel flow-mediated gene expression signature in patients with bicuspid aortic valve. *J Mol Med (Berl)* **91**, 129-139, doi:10.1007/s00109-012-0942-8 (2013).
- 5 Wagsater, D. *et al.* Impaired collagen biosynthesis and cross-linking in aorta of patients with bicuspid aortic valve. *Journal of the American Heart Association* **2**, e000034, doi:10.1161/JAHA.112.000034 (2013).
- 6 Braniste, V. *et al.* The gut microbiota influences blood-brain barrier permeability in mice. *Sci Transl Med* **6**, 263ra158, doi:10.1126/scitranslmed.3009759 (2014).
- 7 Jackson, J. E. *A User's Guide to Principal Components.* (Wiley, New York 1991).
- 8 Trygg, J. & Wold, S. Orthogonal projections to latent structures (O-PLS). *J Chemometr* **16**, 119-128, doi:DOI 10.1002/cem.695 (2002).
- 9 Martens, H., Hoy, M., Westad, F., Folkenberg, D. & Martens, M. Analysis of designed experiments by stabilised PLS Regression and jack-knifing. *Chemometr Intell Lab* **58**, 151-170, doi:Doi 10.1016/S0169-7439(01)00157-5 (2001).
- 10 Wold, S. Cross-Validatory Estimation of Number of Components in Factor and Principal Components Models. *Technometrics* **20**, 397-405, doi:Doi 10.2307/1267639 (1978).
- 11 Folkersen, L. *et al.* Unraveling divergent gene expression profiles in bicuspid and tricuspid aortic valve patients with thoracic aortic dilatation: the ASAP study. *Mol Med* **17**, 1365-1373, doi:10.2119/molmed.2011.00286 (2011).
- 12 Subramanian, A. *et al.* Gene set enrichment analysis: a knowledge-based approach for interpreting genome-wide expression profiles. *Proc Natl Acad Sci U S A* **102**, 15545-15550, doi:10.1073/pnas.0506580102 (2005).
- 13 Peri, S. *et al.* Human protein reference database as a discovery resource for proteomics. *Nucleic Acids Res* **32**, D497-501, doi:10.1093/nar/gkh070 (2004).
- 14 Corallino, S., Malabarba, M. G., Zobel, M., Di Fiore, P. P. & Scita, G. Epithelial-to-Mesenchymal Plasticity Harnesses Endocytic Circuitries. *Front Oncol* **5**, 45, doi:10.3389/fonc.2015.00045 (2015).
- 15 Mamidi, S., Hone, S. & Kirschfink, M. The complement system in cancer: Ambivalence between tumour destruction and promotion. *Immunobiology*, doi:10.1016/j.imbio.2015.11.008 (2015).
- 16 Holecek, M. Relation between glutamine, branched-chain amino acids, and protein metabolism. *Nutrition* **18**, 130-133 (2002).
- 17 Lee, B. Y., Timpson, P., Horvath, L. G. & Daly, R. J. FAK signaling in human cancer as a target for therapeutics. *Pharmacol Ther* **146**, 132-149, doi:10.1016/j.pharmthera.2014.10.001 (2015).
- 18 Twum-Ampofo, J., Fu, D. X., Passaniti, A., Hussain, A. & Siddiqui, M. M. Metabolic targets for potential prostate cancer therapeutics. *Curr Opin Oncol*, doi:10.1097/CCO.0000000000000276 (2016).

- 19 Lane, A. N. & Fan, T. W. Regulation of mammalian nucleotide metabolism and biosynthesis. *Nucleic Acids Res* **43**, 2466-2485, doi:10.1093/nar/gkv047 (2015).
- 20 Alanko, J. & Ivaska, J. Endosomes: Emerging Platforms for Integrin-Mediated FAK Signalling. *Trends Cell Biol*, doi:10.1016/j.tcb.2016.02.001 (2016).
- 21 Long, J. P., Li, X. N. & Zhang, F. Targeting metabolism in breast cancer: How far we can go? *World J Clin Oncol* **7**, 122-130, doi:10.5306/wjco.v7.i1.122 (2016).
- 22 Ramadan, S. *et al.* Use of in vivo two-dimensional MR spectroscopy to compare the biochemistry of the human brain to that of glioblastoma. *Radiology* **259**, 540-549, doi:10.1148/radiol.11101123 (2011).
- 23 Yang, Y. *et al.* Mitochondria and Mitochondrial ROS in Cancer: Novel Targets for Anticancer Therapy. *J Cell Physiol*, doi:10.1002/jcp.25349 (2016).
- 24 Aberg, M., Eriksson, O. & Siegbahn, A. Tissue Factor Noncoagulant Signaling: Mechanisms and Implications for Cell Migration and Apoptosis. *Semin Thromb Hemost* **41**, 691-699, doi:10.1055/s-0035-1564046 (2015).
- 25 Kao, S. H., Wu, K. J. & Lee, W. H. Hypoxia, Epithelial-Mesenchymal Transition, and TET-Mediated Epigenetic Changes. *J Clin Med* **5**, doi:10.3390/jcm5020024 (2016).
- 26 Baig, S. *et al.* Potential of apoptotic pathway-targeted cancer therapeutic research: Where do we stand? *Cell death & disease* **7**, e2058, doi:10.1038/cddis.2015.275 (2016).
- 27 Haissaguerre, M., Saucisse, N. & Cota, D. Influence of mTOR in energy and metabolic homeostasis. *Mol Cell Endocrinol* **397**, 67-77, doi:10.1016/j.mce.2014.07.015 (2014).
- 28 Morris, H. T. & Machesky, L. M. Actin cytoskeletal control during epithelial to mesenchymal transition: focus on the pancreas and intestinal tract. *Br J Cancer* **112**, 613-620, doi:10.1038/bjc.2014.658 (2015).
- 29 Reymond, N., d'Agua, B. B. & Ridley, A. J. Crossing the endothelial barrier during metastasis. *Nat Rev Cancer* **13**, 858-870, doi:10.1038/nrc3628 (2013).
- 30 Wojtuszkiewicz, A. *et al.* Pre-mRNA splicing in cancer: the relevance in oncogenesis, treatment and drug resistance. *Expert Opin Drug Metab Toxicol* **11**, 673-689, doi:10.1517/17425255.2015.993316 (2015).
- 31 Joshi, T., Butchar, J. P. & Tridandapani, S. Fcγ receptor signaling in phagocytes. *Int J Hematol* **84**, 210-216, doi:10.1532/IJH97.06140 (2006).
- 32 Zihni, C. & Terry, S. J. RhoGTPase signalling at epithelial tight junctions: Bridging the GAP between polarity and cancer. *Int J Biochem Cell Biol* **64**, 120-125, doi:10.1016/j.biocel.2015.02.020 (2015).
- 33 Cosenza, M. R. & Kramer, A. Centrosome amplification, chromosomal instability and cancer: mechanistic, clinical and therapeutic issues. *Chromosome Res* **24**, 105-126, doi:10.1007/s10577-015-9505-5 (2016).
- 34 Tai, S., Hu, X. Q., Peng, D. Q., Zhou, S. H. & Zheng, X. L. The roles of autophagy in vascular smooth muscle cells. *Int J Cardiol* **211**, 1-6, doi:10.1016/j.ijcard.2016.02.128 (2016).
- 35 Hsieh, A. L., Walton, Z. E., Altman, B. J., Stine, Z. E. & Dang, C. V. MYC and metabolism on the path to cancer. *Semin Cell Dev Biol* **43**, 11-21, doi:10.1016/j.semcdb.2015.08.003 (2015).
- 36 Jiang, J. *et al.* Multifunctional proteins bridge mitosis with motility and cancer with inflammation and arthritis. *ScientificWorldJournal* **10**, 1244-1257, doi:10.1100/tsw.2010.141 (2010).
- 37 Jimenez, G., Shvartsman, S. Y. & Paroush, Z. The Capicua repressor--a general sensor of RTK signaling in development and disease. *J Cell Sci* **125**, 1383-1391, doi:10.1242/jcs.092965 (2012).
- 38 Merlo, P. & Cecconi, F. XIAP: inhibitor of two worlds. *EMBO J* **32**, 2187-2188, doi:10.1038/emboj.2013.152 (2013).

- 39 Obexer, P. & Ausserlechner, M. J. X-linked inhibitor of apoptosis protein - a critical death resistance regulator and therapeutic target for personalized cancer therapy. *Front Oncol* **4**, 197, doi:10.3389/fonc.2014.00197 (2014).
- 40 Chamulitrat, W., Sattayakhom, A., Herold-Mende, C. & Stremmel, W. Human papillomavirus 16 E6/E7-immortalized human gingival keratinocytes with epithelial mesenchymal transition acquire increased expression of cIAP-1, Bclx and p27(Kip1). *Exp Dermatol* **18**, 1067-1069, doi:10.1111/j.1600-0625.2009.00888.x (2009).
- 41 Lee, J. & Kim, S. S. The function of p27 KIP1 during tumor development. *Exp Mol Med* **41**, 765-771, doi:10.3858/emm.2009.41.11.102 (2009).
- 42 Subramaniam, D., Thombre, R., Dhar, A. & Anant, S. DNA methyltransferases: a novel target for prevention and therapy. *Front Oncol* **4**, 80, doi:10.3389/fonc.2014.00080 (2014).
- 43 Jiang, Y. Z. *et al.* Hemodynamic disturbed flow induces differential DNA methylation of endothelial Kruppel-Like Factor 4 promoter in vitro and in vivo. *Circ Res* **115**, 32-43, doi:10.1161/CIRCRESAHA.115.303883 (2014).
- 44 Suzuki, N. *et al.* Calcium-dependent structural changes in human reticulocalbin-1. *J Biochem* **155**, 281-293, doi:10.1093/jb/mvu003 (2014).
- 45 Feighery, R., Maguire, P., Ryan, M. P. & McMorrow, T. A proteomic approach to immune-mediated epithelial-mesenchymal transition. *Proteomics Clin Appl* **2**, 1110-1117, doi:10.1002/prca.200780148 (2008).
- 46 Amatschek, S. *et al.* Tissue-wide expression profiling using cDNA subtraction and microarrays to identify tumor-specific genes. *Cancer Res* **64**, 844-856 (2004).
- 47 Gomes, A. V. Genetics of proteasome diseases. *Scientifica (Cairo)* **2013**, 637629, doi:10.1155/2013/637629 (2013).
- 48 Canal, F. *et al.* A kinome siRNA screen identifies HGS as a potential target for liver cancers with oncogenic mutations in CTNNB1. *BMC Cancer* **15**, 1020, doi:10.1186/s12885-015-2037-8 (2015).
- 49 Kojima, K. *et al.* ESCRT-0 protein hepatocyte growth factor-regulated tyrosine kinase substrate (Hrs) is targeted to endosomes independently of signal-transducing adaptor molecule (STAM) and the complex formation with STAM promotes its endosomal dissociation. *J Biol Chem* **289**, 33296-33310, doi:10.1074/jbc.M114.578245 (2014).
- 50 Miller-Delaney, S. F., Lieberam, I., Murphy, P. & Mitchell, K. J. Plxdc2 is a mitogen for neural progenitors. *PLoS one* **6**, e14565, doi:10.1371/journal.pone.0014565 (2011).
- 51 Carson-Walter, E. B. *et al.* Cell surface tumor endothelial markers are conserved in mice and humans. *Cancer Res* **61**, 6649-6655 (2001).
- 52 Iglesias-Gato, D. *et al.* OTUB1 de-ubiquitinating enzyme promotes prostate cancer cell invasion in vitro and tumorigenesis in vivo. *Mol Cancer* **14**, 8, doi:10.1186/s12943-014-0280-2 (2015).
- 53 Zhou, Y. *et al.* OTUB1 promotes metastasis and serves as a marker of poor prognosis in colorectal cancer. *Mol Cancer* **13**, 258, doi:10.1186/1476-4598-13-258 (2014).
- 54 Rozanov, D. V. *et al.* Molecular signature of MT1-MMP: transactivation of the downstream universal gene network in cancer. *Cancer Res* **68**, 4086-4096, doi:10.1158/0008-5472.CAN-07-6458 (2008).
- 55 Falsone, S. F., Gesslbauer, B., Tirk, F., Piccinini, A. M. & Kungl, A. J. A proteomic snapshot of the human heat shock protein 90 interactome. *FEBS Lett* **579**, 6350-6354, doi:10.1016/j.febslet.2005.10.020 (2005).
- 56 O'Rourke, S. M., Dorfman, M. D., Carter, J. C. & Bowerman, B. Dynein modifiers in *C. elegans*: light chains suppress conditional heavy chain mutants. *PLoS Genet* **3**, e128, doi:10.1371/journal.pgen.0030128 (2007).

- 57 Kimura, N., Okabayashi, S. & Ono, F. Dynein dysfunction disrupts beta-amyloid clearance in astrocytes through endocytic disturbances. *Neuroreport* **25**, 514-520, doi:10.1097/WNR.000000000000124 (2014).
- 58 Xu, M. *et al.* Regulation of autophagic flux by dynein-mediated autophagosomes trafficking in mouse coronary arterial myocytes. *Biochim Biophys Acta* **1833**, 3228-3236, doi:10.1016/j.bbamcr.2013.09.015 (2013).
- 59 Besse, A. *et al.* The GABA transaminase, ABAT, is essential for mitochondrial nucleoside metabolism. *Cell metabolism* **21**, 417-427, doi:10.1016/j.cmet.2015.02.008 (2015).
- 60 Mauxion, F., Preve, B. & Seraphin, B. C2ORF29/CNOT11 and CNOT10 form a new module of the CCR4-NOT complex. *RNA Biol* **10**, 267-276, doi:10.4161/rna.23065 (2013).
- 61 Lin, Y. F., Yang, J. & Rosen, B. P. ArsD: an As(III) metallochaperone for the ArsAB As(III)-translocating ATPase. *J Bioenerg Biomembr* **39**, 453-458, doi:10.1007/s10863-007-9113-y (2007).
- 62 Lehtinen, L. *et al.* High-throughput RNAi screening for novel modulators of vimentin expression identifies MTHFD2 as a regulator of breast cancer cell migration and invasion. *Oncotarget* **4**, 48-63 (2013).
- 63 Nilsson, R. *et al.* Metabolic enzyme expression highlights a key role for MTHFD2 and the mitochondrial folate pathway in cancer. *Nat Commun* **5**, 3128, doi:10.1038/ncomms4128 (2014).
- 64 Smith, M. A. *et al.* A zyxin-mediated mechanism for actin stress fiber maintenance and repair. *Dev Cell* **19**, 365-376, doi:10.1016/j.devcel.2010.08.008 (2010).
- 65 Smith, M. A., Hoffman, L. M. & Beckerle, M. C. LIM proteins in actin cytoskeleton mechanoresponse. *Trends Cell Biol* **24**, 575-583, doi:10.1016/j.tcb.2014.04.009 (2014).
- 66 Kim, D. H. & Wirtz, D. Predicting how cells spread and migrate: focal adhesion size does matter. *Cell Adh Migr* **7**, 293-296, doi:10.4161/cam.24804 (2013).
- 67 Mise, N. *et al.* Zyxin is a transforming growth factor-beta (TGF-beta)/Smad3 target gene that regulates lung cancer cell motility via integrin alpha5beta1. *J Biol Chem* **287**, 31393-31405, doi:10.1074/jbc.M112.357624 (2012).
- 68 Richmond, J., Tuzova, M., Cruikshank, W. & Center, D. Regulation of cellular processes by interleukin-16 in homeostasis and cancer. *J Cell Physiol* **229**, 139-147, doi:10.1002/jcp.24441 (2014).
- 69 Mertz, J. *et al.* Sequential Elution Interactome Analysis of the Mind Bomb 1 Ubiquitin Ligase Reveals a Novel Role in Dendritic Spine Outgrowth. *Molecular & cellular proteomics : MCP* **14**, 1898-1910, doi:10.1074/mcp.M114.045898 (2015).
- 70 Gan-Or, Z., Dion, P. A. & Rouleau, G. A. Genetic perspective on the role of the autophagy-lysosome pathway in Parkinson disease. *Autophagy* **11**, 1443-1457, doi:10.1080/15548627.2015.1067364 (2015).
- 71 Ohi, Y. *et al.* Incomplete DNA methylation underlies a transcriptional memory of somatic cells in human iPS cells. *Nat Cell Biol* **13**, 541-549, doi:10.1038/ncb2239 (2011).
- 72 Cai, L. Y. *et al.* Identification of PRTFDC1 silencing and aberrant promoter methylation of GPR150, ITGA8 and HOXD11 in ovarian cancers. *Life Sci* **80**, 1458-1465, doi:10.1016/j.lfs.2007.01.015 (2007).
- 73 Sweetser, D. A. *et al.* Delineation of the minimal commonly deleted segment and identification of candidate tumor-suppressor genes in del(9q) acute myeloid leukemia. *Genes Chromosomes Cancer* **44**, 279-291, doi:10.1002/gcc.20236 (2005).
- 74 Kaartokallio, T., Cervera, A., Kyllonen, A., Laivuori, K. & Group, F. C. I. Gene expression profiling of pre-eclamptic placentae by RNA sequencing. *Sci Rep* **5**, 14107, doi:10.1038/srep14107 (2015).



- 75 Jiang, P., Du, W., Mancuso, A., Wellen, K. E. & Yang, X. Reciprocal regulation of p53 and malic enzymes modulates metabolism and senescence. *Nature* **493**, 689-693, doi:10.1038/nature11776 (2013).
- 76 Zheng, F. J. *et al.* Repressing malic enzyme 1 redirects glucose metabolism, unbalances the redox state, and attenuates migratory and invasive abilities in nasopharyngeal carcinoma cell lines. *Chin J Cancer* **31**, 519-531, doi:10.5732/cjc.012.10088 (2012).
- 77 Rosenbluh, J. *et al.* beta-Catenin-driven cancers require a YAP1 transcriptional complex for survival and tumorigenesis. *Cell* **151**, 1457-1473, doi:10.1016/j.cell.2012.11.026 (2012).
- 78 Zhang, H. *et al.* Yap1 is required for endothelial to mesenchymal transition of the atrioventricular cushion. *J Biol Chem* **289**, 18681-18692, doi:10.1074/jbc.M114.554584 (2014).
- 79 Tschaharganeh, D. F. *et al.* Yes-associated protein up-regulates Jagged-1 and activates the Notch pathway in human hepatocellular carcinoma. *Gastroenterology* **144**, 1530-1542 e1512, doi:10.1053/j.gastro.2013.02.009 (2013).
- 80 Lamar, J. M. *et al.* The Hippo pathway target, YAP, promotes metastasis through its TEAD-interaction domain. *Proc Natl Acad Sci U S A* **109**, E2441-2450, doi:10.1073/pnas.1212021109 (2012).
- 81 Kato, K., Okuwaki, M. & Nagata, K. Role of Template Activating Factor-I as a chaperone in linker histone dynamics. *J Cell Sci* **124**, 3254-3265, doi:10.1242/jcs.083139 (2011).
- 82 Cervoni, N., Detich, N., Seo, S. B., Chakravarti, D. & Szyf, M. The oncoprotein Set/TAF-1beta, an inhibitor of histone acetyltransferase, inhibits active demethylation of DNA, integrating DNA methylation and transcriptional silencing. *J Biol Chem* **277**, 25026-25031, doi:10.1074/jbc.M202256200 (2002).
- 83 Chaineau, M., Ioannou, M. S. & McPherson, P. S. Rab35: GEFs, GAPs and effectors. *Traffic* **14**, 1109-1117, doi:10.1111/tra.12096 (2013).
- 84 Iwamura, A., Fukami, T., Higuchi, R., Nakajima, M. & Yokoi, T. Human alpha/beta hydrolase domain containing 10 (ABHD10) is responsible enzyme for deglucuronidation of mycophenolic acid acyl-glucuronide in liver. *J Biol Chem* **287**, 9240-9249, doi:10.1074/jbc.M111.271288 (2012).
- 85 Bailey, M. J. & Dickinson, R. G. Acyl glucuronide reactivity in perspective: biological consequences. *Chem Biol Interact* **145**, 117-137 (2003).
- 86 Vaccari, T. & Bilder, D. The Drosophila tumor suppressor vps25 prevents nonautonomous overproliferation by regulating notch trafficking. *Dev Cell* **9**, 687-698, doi:10.1016/j.devcel.2005.09.019 (2005).
- 87 Le Borgne, R. Regulation of Notch signalling by endocytosis and endosomal sorting. *Curr Opin Cell Biol* **18**, 213-222, doi:10.1016/j.ceb.2006.02.011 (2006).
- 88 Rusten, T. E. *et al.* ESCRTs and Fab1 regulate distinct steps of autophagy. *Curr Biol* **17**, 1817-1825, doi:10.1016/j.cub.2007.09.032 (2007).
- 89 Fedorova, O. A. *et al.* Proteomic analysis of the 20S proteasome (PSMA3)-interacting proteins reveals a functional link between the proteasome and mRNA metabolism. *Biochem Biophys Res Commun* **416**, 258-265, doi:10.1016/j.bbrc.2011.10.126 (2011).
- 90 Head, R. A. *et al.* Clinical and genetic spectrum of pyruvate dehydrogenase deficiency: dihydrolipoamide acetyltransferase (E2) deficiency. *Ann Neurol* **58**, 234-241, doi:10.1002/ana.20550 (2005).
- 91 Sepe, M. *et al.* A regulatory mechanism involving TBP-1/Tat-Binding Protein 1 and Akt/PKB in the control of cell proliferation. *PLoS one* **6**, e22800, doi:10.1371/journal.pone.0022800 (2011).
- 92 Pollice, A. *et al.* TBP-1 protects the human oncosuppressor p14ARF from proteasomal degradation. *Oncogene* **26**, 5154-5162, doi:10.1038/sj.onc.1210313 (2007).
- 93 Park, B. W. *et al.* Induction of the Tat-binding protein 1 gene accompanies the disabling of oncogenic erbB receptor tyrosine kinases. *Proc Natl Acad Sci U S A* **96**, 6434-6438 (1999).

- 94 Frey, C. R. *et al.* Mutations in adenosine deaminase-like (ADAL) protein confer resistance to the antiproliferative agents N6-cyclopropyl-PMEDAP and GS-9219. *Anticancer research* **33**, 1899-1912 (2013).
- 95 Jovov, B. *et al.* Differential gene expression between African American and European American colorectal cancer patients. *PLoS one* **7**, e30168, doi:10.1371/journal.pone.0030168 (2012).
- 96 Kondo, A. *et al.* A new paxillin-binding protein, PAG3/Papalpha/KIAA0400, bearing an ADP-ribosylation factor GTPase-activating protein activity, is involved in paxillin recruitment to focal adhesions and cell migration. *Mol Biol Cell* **11**, 1315-1327 (2000).
- 97 Uchida, H., Kondo, A., Yoshimura, Y., Mazaki, Y. & Sabe, H. PAG3/Papalpha/KIAA0400, a GTPase-activating protein for ADP-ribosylation factor (ARF), regulates ARF6 in Fcγ receptor-mediated phagocytosis of macrophages. *J Exp Med* **193**, 955-966 (2001).
- 98 Gotoh, M. *et al.* Comprehensive exploration of novel chimeric transcripts in clear cell renal cell carcinomas using whole transcriptome analysis. *Genes Chromosomes Cancer* **53**, 1018-1032, doi:10.1002/gcc.22211 (2014).
- 99 Cai, T. *et al.* Identification of differentially coexpressed genes in gonadotrope tumors and normal pituitary using bioinformatics methods. *Pathol Oncol Res* **20**, 375-380, doi:10.1007/s12253-013-9706-1 (2014).
- 100 Mou, Z., Tapper, A. R. & Gardner, P. D. The armadillo repeat-containing protein, ARMCX3, physically and functionally interacts with the developmental regulatory factor Sox10. *J Biol Chem* **284**, 13629-13640, doi:10.1074/jbc.M901177200 (2009).
- 101 Serrat, R. *et al.* The non-canonical Wnt/PKC pathway regulates mitochondrial dynamics through degradation of the arm-like domain-containing protein Alex3. *PLoS one* **8**, e67773, doi:10.1371/journal.pone.0067773 (2013).
- 102 Grochola, L. F. *et al.* Recent natural selection identifies a genetic variant in a regulatory subunit of protein phosphatase 2A that associates with altered cancer risk and survival. *Clin Cancer Res* **15**, 6301-6308, doi:10.1158/1078-0432.CCR-09-0797 (2009).
- 103 Liu, X. *et al.* Downregulation of PPP2R5E expression by miR-23a suppresses apoptosis to facilitate the growth of gastric cancer cells. *FEBS Lett* **588**, 3160-3169, doi:10.1016/j.febslet.2014.05.068 (2014).
- 104 Cristobal, I. *et al.* Downregulation of PPP2R5E is a common event in acute myeloid leukemia that affects the oncogenic potential of leukemic cells. *Haematologica* **98**, e103-104, doi:10.3324/haematol.2013.084731 (2013).
- 105 Yang, R. *et al.* Functional genetic polymorphisms in PP2A subunit genes confer increased risks of lung cancer in southern and eastern Chinese. *PLoS one* **8**, e77285, doi:10.1371/journal.pone.0077285 (2013).
- 106 Cristobal, I. *et al.* PP2A inhibition is a common event in colorectal cancer and its restoration using FTY720 shows promising therapeutic potential. *Mol Cancer Ther* **13**, 938-947, doi:10.1158/1535-7163.MCT-13-0150 (2014).
- 107 Offenhauser, N. *et al.* The eps8 family of proteins links growth factor stimulation to actin reorganization generating functional redundancy in the Ras/Rac pathway. *Mol Biol Cell* **15**, 91-98, doi:10.1091/mbc.E03-06-0427 (2004).
- 108 Colas, E. *et al.* Molecular markers of endometrial carcinoma detected in uterine aspirates. *Int J Cancer* **129**, 2435-2444, doi:10.1002/ijc.25901 (2011).
- 109 Yoshida, M. *et al.* RPAP3 splicing variant isoform 1 interacts with PIH1D1 to compose R2TP complex for cell survival. *Biochem Biophys Res Commun* **430**, 320-324, doi:10.1016/j.bbrc.2012.11.017 (2013).
- 110 Ni, L. *et al.* RPAP3 interacts with Reptin to regulate UV-induced phosphorylation of H2AX and DNA damage. *J Cell Biochem* **106**, 920-928, doi:10.1002/jcb.22073 (2009).

- 111 von Morgen, P., Horejsi, Z. & Macurek, L. Substrate recognition and function of the R2TP complex in response to cellular stress. *Front Genet* **6**, 69, doi:10.3389/fgene.2015.00069 (2015).
- 112 Bartke, T., Pohl, C., Pyrowolakis, G. & Jentsch, S. Dual role of BRUCE as an antiapoptotic IAP and a chimeric E2/E3 ubiquitin ligase. *Mol Cell* **14**, 801-811, doi:10.1016/j.molcel.2004.05.018 (2004).
- 113 Tang, W. *et al.* BIRC6 promotes hepatocellular carcinogenesis: interaction of BIRC6 with p53 facilitating p53 degradation. *Int J Cancer* **136**, E475-487, doi:10.1002/ijc.29194 (2015).
- 114 Luk, S. U. *et al.* The BIRC6 gene as a novel target for therapy of prostate cancer: dual targeting of inhibitors of apoptosis. *Oncotarget* **5**, 6896-6908 (2014).
- 115 Wang, L. *et al.* Expression and clinical significance of BIRC6 in human epithelial ovarian cancer. *Tumour Biol* **35**, 4891-4896, doi:10.1007/s13277-014-1641-6 (2014).
- 116 Dong, X. *et al.* Elevated expression of BIRC6 protein in non-small-cell lung cancers is associated with cancer recurrence and chemoresistance. *J Thorac Oncol* **8**, 161-170, doi:10.1097/JTO.0b013e31827d5237 (2013).
- 117 Goldenstein, H., Levy, N. S. & Levy, A. P. Haptoglobin genotype and its role in determining heme-iron mediated vascular disease. *Pharmacol Res* **66**, 1-6, doi:10.1016/j.phrs.2012.02.011 (2012).
- 118 Costacou, T. & Levy, A. P. Haptoglobin genotype and its role in diabetic cardiovascular disease. *J Cardiovasc Transl Res* **5**, 423-435, doi:10.1007/s12265-012-9361-z (2012).
- 119 Buttari, B. *et al.* Oxidized haemoglobin-driven endothelial dysfunction and immune cell activation: novel therapeutic targets for atherosclerosis. *Curr Med Chem* **20**, 4806-4814 (2013).
- 120 Schaer, C. A. *et al.* Mechanisms of haptoglobin protection against hemoglobin peroxidation triggered endothelial damage. *Cell Death Differ* **20**, 1569-1579, doi:10.1038/cdd.2013.113 (2013).
- 121 Park, D. S., Seo, J. H., Hong, M. & Choi, S. C. Role of the Rap2/TNIK kinase pathway in regulation of LRP6 stability for Wnt signaling. *Biochem Biophys Res Commun* **436**, 338-343, doi:10.1016/j.bbrc.2013.05.104 (2013).
- 122 Wu, J. X., Zhang, D. G., Zheng, J. N. & Pei, D. S. Rap2a is a novel target gene of p53 and regulates cancer cell migration and invasion. *Cell Signal* **27**, 1198-1207, doi:10.1016/j.cellsig.2015.02.026 (2015).
- 123 Wang, L. *et al.* Over-expression of Rap2a inhibits glioma migration and invasion by down-regulating p-AKT. *Cell Biol Int* **38**, 326-334, doi:10.1002/cbin.10213 (2014).
- 124 Dib, K., Axelsson, L. & Andersson, T. Beta2 integrins target Rap GTPases to the plasma membrane by means of degranulation. *Biochem Biophys Res Commun* **376**, 642-646, doi:10.1016/j.bbrc.2008.08.160 (2008).
- 125 Stratikos, E., Stamogiannos, A., Zervoudi, E. & Fruci, D. A role for naturally occurring alleles of endoplasmic reticulum aminopeptidases in tumor immunity and cancer pre-disposition. *Front Oncol* **4**, 363, doi:10.3389/fonc.2014.00363 (2014).
- 126 Gadalla, S. E. *et al.* EpCAM associates with endoplasmic reticulum aminopeptidase 2 (ERAP2) in breast cancer cells. *Biochem Biophys Res Commun* **439**, 203-208, doi:10.1016/j.bbrc.2013.08.059 (2013).
- 127 Castello, A. *et al.* Insights into RNA biology from an atlas of mammalian mRNA-binding proteins. *Cell* **149**, 1393-1406, doi:10.1016/j.cell.2012.04.031 (2012).
- 128 Lee, O. H. *et al.* Genome-wide YFP fluorescence complementation screen identifies new regulators for telomere signaling in human cells. *Molecular & cellular proteomics : MCP* **10**, M110 001628, doi:10.1074/mcp.M110.001628 (2011).
- 129 Powell, A. G., Horgan, P. G. & Edwards, J. The bodies fight against cancer: is human leucocyte antigen (HLA) class 1 the key? *J Cancer Res Clin Oncol* **138**, 723-728, doi:10.1007/s00432-012-1192-4 (2012).

- 130 Nehme, A., Zibara, K., Cerutti, C. & Bricca, G. 8d.07: Gene Expression Analysis and Bioinformatics Revealed Potential Transcription Factors Associated with Renin-Angiotensin-Aldosterone System in Atheroma. *J Hypertens* **33 Suppl 1**, e115, doi:10.1097/01.hjh.0000467661.76779.b2 (2015).
- 131 Schmidt, M., Micke, P., Gehrmann, M. & Hengstler, J. G. Immunoglobulin kappa chain as an immunologic biomarker of prognosis and chemotherapy response in solid tumors. *Oncoimmunology* **1**, 1156-1158, doi:10.4161/onci.21653 (2012).
- 132 Michel, M. A. *et al.* Assembly and specific recognition of k29- and k33-linked polyubiquitin. *Mol Cell* **58**, 95-109, doi:10.1016/j.molcel.2015.01.042 (2015).
- 133 Jiang, J. H. *et al.* Clinical significance of the ubiquitin ligase UBE3C in hepatocellular carcinoma revealed by exome sequencing. *Hepatology* **59**, 2216-2227, doi:10.1002/hep.27012 (2014).
- 134 Chu, B. W. *et al.* The E3 ubiquitin ligase UBE3C enhances proteasome processivity by ubiquitinating partially proteolyzed substrates. *J Biol Chem* **288**, 34575-34587, doi:10.1074/jbc.M113.499350 (2013).
- 135 Zollmann, T., Bock, C., Graab, P. & Abele, R. Team work at its best - TAPL and its two domains. *Biol Chem* **396**, 967-974, doi:10.1515/hsz-2014-0319 (2015).
- 136 Hassan, M., Watari, H., AbuAlmaaty, A., Ohba, Y. & Sakuragi, N. Apoptosis and molecular targeting therapy in cancer. *Biomed Res Int* **2014**, 150845, doi:10.1155/2014/150845 (2014).
- 137 Mukhopadhyay, S., Panda, P. K., Sinha, N., Das, D. N. & Bhutia, S. K. Autophagy and apoptosis: where do they meet? *Apoptosis* **19**, 555-566, doi:10.1007/s10495-014-0967-2 (2014).
- 138 Tian, G. & Cowan, N. J. Tubulin-specific chaperones: components of a molecular machine that assembles the alpha/beta heterodimer. *Methods Cell Biol* **115**, 155-171, doi:10.1016/B978-0-12-407757-7.00011-6 (2013).
- 139 Voloshin, O. *et al.* Tubulin chaperone E binds microtubules and proteasomes and protects against misfolded protein stress. *Cell Mol Life Sci* **67**, 2025-2038, doi:10.1007/s00018-010-0308-8 (2010).
- 140 Stolz, A., Besser, S., Hottmann, H. & Wolf, D. H. Previously unknown role for the ubiquitin ligase Ubr1 in endoplasmic reticulum-associated protein degradation. *Proc Natl Acad Sci U S A* **110**, 15271-15276, doi:10.1073/pnas.1304928110 (2013).
- 141 Summers, D. W., Wolfe, K. J., Ren, H. Y. & Cyr, D. M. The Type II Hsp40 Sis1 cooperates with Hsp70 and the E3 ligase Ubr1 to promote degradation of terminally misfolded cytosolic protein. *PloS one* **8**, e52099, doi:10.1371/journal.pone.0052099 (2013).
- 142 Matsui, T. & Fukuda, M. Rab12 regulates mTORC1 activity and autophagy through controlling the degradation of amino-acid transporter PAT4. *EMBO Rep* **14**, 450-457, doi:10.1038/embor.2013.32 (2013).
- 143 Matsui, T., Itoh, T. & Fukuda, M. Small GTPase Rab12 regulates constitutive degradation of transferrin receptor. *Traffic* **12**, 1432-1443, doi:10.1111/j.1600-0854.2011.01240.x (2011).
- 144 Jiang, H. *et al.* A microtubule-associated zinc finger protein, BuGZ, regulates mitotic chromosome alignment by ensuring Bub3 stability and kinetochore targeting. *Dev Cell* **28**, 268-281, doi:10.1016/j.devcel.2013.12.013 (2014).
- 145 Toledo, C. M. *et al.* BuGZ is required for Bub3 stability, Bub1 kinetochore function, and chromosome alignment. *Dev Cell* **28**, 282-294, doi:10.1016/j.devcel.2013.12.014 (2014).
